# Supplementary material for: Solvent free l-proline-catalysed domino Knoevenagel/6π-electrocyclization for the synthesis of highly functionalised 2H-pyrans
Source: Royal Society of Chemistry journal article supplement (doi:10.1039/c2ra21306k), 2012-01-01
Supplement: c2ra21306k.pdf [file c2ra21306k.pdf]

TUE'Cf xcpegu

## *Electronic Supplementary Information*

# **Solvent free L-Proline-catalysed domino Knoevenagel/ $6\pi$ -electrocyclization for the synthesis of highly functionalised 2H-pyrans**

**Javier Peña<sup>a</sup>, Rosalina F. Moro<sup>a</sup>, P. Basabe, Isidro S. Marcos<sup>a</sup> and David Díez<sup>a\*</sup>**

<sup>a</sup> Departamento Química Orgánica, Facultad de Ciencias Químicas, Universidad de Salamanca, Salamanca, Spain. Fax: 0034923294574; Tel: 0034923294474; E-mail: [ddm@usal.es](mailto:ddm@usal.es)

| Table of contents                                                                | Page |
|----------------------------------------------------------------------------------|------|
| 1. General.....                                                                  | S1   |
| 2. Synthesis of Nazarov reagents, 1b–1d.....                                     | S1   |
| 3. General procedure for the synthesis of 2H-pyrans, 3a–3c.....                  | S3   |
| 4. General procedure for the synthesis of 2H-pyrans and Knoevenagel adducts..... | S4   |
| 5. Spectra of the most representative compounds.....                             | S7   |

## 1. General

Unless otherwise stated, all chemicals were purchased as the highest purity commercially available and were used without further purification, except for **1a**,<sup>1</sup> 10-hydroxycitral **15**,<sup>2</sup> farnesal,<sup>3</sup> **18**<sup>4</sup> and **20**<sup>5</sup> which were synthesised according to the literature procedures. IR spectra were recorded on a BOMEM 100 FT-IR or an AVATAR 370 FT-IR Thermo Nicolet spectrophotometers. <sup>1</sup>H and <sup>13</sup>C NMR spectra were performed in CDCl<sub>3</sub> and referenced to the residual peak of CHCl<sub>3</sub> at δ 7.26 ppm and δ 77.0 ppm, for <sup>1</sup>H and <sup>13</sup>C, respectively, using Varian 200 VX and Bruker DRX 400 instruments. Chemical shifts are reported in δ ppm and coupling constants (*J*) are given in hertz. MS were performed at a VG-TS 250 spectrometer at 70 eV ionising voltage. Mass spectra are presented as *m/z* (% rel int.). HRMS were recorded on a VG Platform (Fisons) spectrometer using chemical ionisation (ammonia as gas) or Fast Atom Bombardment (FAB) technique. For some of the samples, QSTAR XL spectrometer was employed for electrospray ionisation (ESI). Optical rotations were determined on a Perkin-Elmer 241 polarimeter in 1 dm cell. HPLC analysis were carried out on a CHIRALCEL™ AD-H column [cellulose tris(3,5-dimethylphenylcarbamate)] on silica gel using *n*-hexane/isopropyl alcohol. Column chromatography was performed using silica gel 60 (230-400 mesh), with solvent systems indicated in the relevant experimental procedures. Dichloromethane was distilled from calcium hydride; tetrahydrofuran and diethyl ether were distilled from sodium/benzophenone ketyl under argon atmosphere prior to use. Hexane was distilled prior to use.

## 2. Synthesis of the Nazarov reagents, 1b-1d.

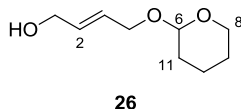

### 2.1 Monoprotection of (*E*)-1,4-butanediol with DHP: (*E*)-4-(((tetrahydro-2*H*-pyran-2-yl)oxy)but-2-en-1-ol, **26**.

(*E*)-1,4-butanediol (4 ml, 48.66 mmol) was dissolved in 194 ml of DCM under Ar at r.t. 3,4-Dihydro-2*H*-pyran (97%, 4.22g, 48.66 mmol) and *p*-toluenesulfonic acid monohydrate (93 mg, 0.486 mmol) were added and left to stir for 3 h. The reaction was quenched with a NaHCO<sub>3</sub> saturated solution, and extracted with DCM. The combined organics were washed with H<sub>2</sub>O, brine, dried (Na<sub>2</sub>SO<sub>4</sub>), filtered and concentrated *in vacuo* to afford **26** (8.01 g, 96%). *v*<sub>max</sub> (liquid film) 3417, 2943, 2870, 1454, 1352, 1261, 1134; δ<sub>H</sub> (200 MHz; CDCl<sub>3</sub>) 5.88-5.33 (2H, m, H2 and H3), 4.67-4.60 (1H, m, H6), 4.32-3.99 (4H, m, H1 and H4), 3.92-3.71 (1H, m, H8<sub>a</sub>), 3.57-3.40 (1H, m, H8<sub>b</sub>), 1.91-1.36 (6H, m, H9, H10, and H11); δ<sub>C</sub> (50 MHz; CDCl<sub>3</sub>) 132.6, 127.3, 97.6, 62.6, 62.0, 57.9, 30.5, 25.4, 19.3; EIHRMS: Calcd for C<sub>9</sub>H<sub>16</sub>O<sub>3</sub> (M+Na): 195.0592; found: 195.0991 (M+Na).

<sup>1</sup> J. Peña, A. B. Antón, R. F. Moro, I. S. Marcos, N. M. Garrido and D. Díez, *Tetrahedron* 2011, **67**, 8331.

<sup>2</sup> S. Xie, S. Uesato, T. Fujita and H. Inouye, *J. Nat. Prod.* 1989, **52**, 701.

<sup>3</sup> K. Ishihara, H. Ishibashi and H. Yamamoto, *J. Am. Chem. Soc.* 2002, **124**, 3647.

<sup>4</sup> J. G. Urones, J. De Pascual Teresa, I. S. Marcos, D. Díez, N. M. Garrido and R. A. Guerra, *Phytochemistry* 1987, **26**, 1077.

<sup>5</sup> P. Basabe, M. de Román, D. Díez, I. S. Marcos, O. Boderó, A. Blanco, F. Mollinedo and J. G. Urones, *Synlett* 2008, **8**, 1149.

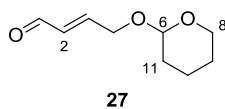

## 2.2. Oxidation of 26 with PDC: (E)-4-((tetrahydro-2H-pyran-2-yl)oxy)but-2-enal, 27.

A mixture of monoprotected diol **26** (8.01 g, 46.5 mmol) and molecular sieves were dissolved in 232 ml of DCM under Ar and stirred at room temperature for 5 min. PDC (34.9 g, 93.02 mmol) was added and left to stir for 5 h. The mixture was filtered through a pad of Celite®/Silica/Celite®, and then extracted with EtOAc to afford **27** (7.19 g, 91%).  $\nu_{\max}$  (liquid film) 2945, 2870, 2853, 2727, 1693, 1454, 1352, 1261, 1201, 1120;  $\delta_{\text{H}}$  (200 MHz; CDCl<sub>3</sub>) 9.54 (1H, d,  $J$  = 8.0 Hz, CHO), 6.85 (1H, dt,  $J$  = 15.7, 4.0 Hz, H<sub>3</sub>), 6.34 (1H, ddt,  $J$  = 15.7, 8.0, 2.0 Hz, H<sub>2</sub>), 4.68-4.61 (1H, m, H<sub>6</sub>), 4.49 (1H, ddd,  $J$  = 17.3, 4.0, 2.0 Hz, H<sub>4a</sub>), 4.21 (1H, ddd,  $J$  = 17.3, 4.0, 2.0 Hz, H<sub>4b</sub>), 3.86-3.72 (1H, m, H<sub>8a</sub>), 3.56-3.42 (1H, m, H<sub>8b</sub>), 1.86-1.43 (6H, m, H<sub>9</sub>, H<sub>10</sub>, and H<sub>11</sub>);  $\delta_{\text{C}}$  (50 MHz; CDCl<sub>3</sub>) 193.5, 153.7, 131.5, 98.4, 65.6, 62.2, 30.4, 25.4, 19.2; EIHRMS: Calcd for C<sub>9</sub>H<sub>14</sub>O<sub>3</sub> (M+Na): 193.0835; found: 193.0835 (M+Na).

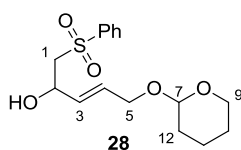

## 2.3. Addition of methylphenylsulfone to 27: (E)-1-(phenylsulfonyl)-5-((tetrahydro-2H-pyran-2-yl)oxy)pent-3-en-2-ol, 28.

Methylphenylsulfone (3.64 g, 23.29 mmol) was dissolved in 100 ml of THF under Ar at -78 °C. *n*-BuLi (1.6 M in hexanes, 14.9 ml, 23.29 mmol) was added and the mixture was stirred 15 min. Separately, **27** (4.40 g, 25.88 mmol) was dissolved in 30 ml of THF under Ar at r.t. This solution was added *via cannula* to the former one and the mixture was stirred at -78 °C under Ar for 2h. Then the reaction was quenched with a NH<sub>4</sub>Cl saturated solution and left to warm at room temperature. Then it was extracted with EtOAc and the combined organics were washed with H<sub>2</sub>O, brine, dried (Na<sub>2</sub>SO<sub>4</sub>), filtered and concentrated in vacuo to leave a crude yellow oil. Flash chromatography (hexane:EtOAc, 6:4) afforded **28** (4.63 g, 61%).  $\nu_{\max}$  (liquid film) 3444, 2953, 2872, 2250, 1732, 1446, 1288, 1138  $\delta_{\text{H}}$  (200 MHz; CDCl<sub>3</sub>) 7.97-7.83 (2H, m, ArH<sub>ortho</sub>), 7.71-7.46 (3H, m, ArH<sub>meta</sub>, ArH<sub>para</sub>), 5.83 (1H, dt,  $J$  = 15.5, 5.2 Hz, H<sub>4</sub>), 5.62 (1H, dd,  $J$  = 15.5, 5.2 Hz, H<sub>3</sub>), 4.76-4.59 (1H, m, H<sub>7</sub>), 4.59-4.49 (1H, m, H<sub>2</sub>), 4.15 (1H, dd,  $J$  = 13.3, 4.6 Hz, H<sub>5a</sub>), 3.95-3.69 (2H, m, H<sub>1a</sub> and H<sub>5b</sub>), 3.55-3.41 (2H, m, H<sub>9</sub>), 3.30-3.19 (2H, m, H<sub>1b</sub> and H<sub>5c</sub>), 1.84-1.37 (6H, m, H<sub>10</sub>, H<sub>11</sub>, and H<sub>12</sub>);  $\delta_{\text{C}}$  (50 MHz; CDCl<sub>3</sub>) 139.7, 134.1, 131.4, 129.5 (2C), 128.8, 128.1 (2C), 98.1, 66.6, 66.5, 62.2, 62.1, 30.6, 25.5, 19.5; EIHRMS: Calcd for C<sub>16</sub>H<sub>22</sub>O<sub>5</sub>S (M+Na): 349.1080; found: 349.1080 (M+Na).

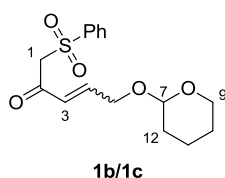

## 2.4. Oxidation of 28 with PDC: (E)-1-(phenylsulfonyl)-5-((tetrahydro-2H-pyran-2-yl)oxy)pent-3-en-2-one, 1b and 1c.

A mixture of **28** (537 g, 1.65 mmol) and molecular sieves were dissolved in 8 ml of DCM under Ar and stirred at r.t. for 5 min. PDC (1.24 g, 3.30 mmol) was added and left to stir for 4 h. The mixture was filtered through a pad of Celite®/Silica/Celite®, and then extracted with EtOAc to afford a crude brown oil. Flash chromatography (hexane:EtOAc, 6:4) afforded **1b** (304 mg, 57%) and **1c** (5 mg, 1%). **1b**:  $\nu_{\max}$  (liquid film) 2943, 2870, 2852, 1693, 1666, 1633, 1446, 1384, 1325, 1153;  $\delta_{\text{H}}$  (200 MHz; CDCl<sub>3</sub>) 7.89 (2H, d,  $J$  = 7.0 Hz, ArH<sub>ortho</sub>), 7.74-7.50 (3H, m, ArH<sub>meta</sub> and ArH<sub>para</sub>), 6.98 (1H, dt,  $J$  = 15.8, 3.9 Hz, H<sub>4</sub>), 6.54 (1H, dt,  $J$  = 15.8, 1.9 Hz, H<sub>3</sub>), 4.65 (1H, t,  $J$  = 3.1 Hz, H<sub>7</sub>), 4.46 (1H, ddd,  $J$  = 17.6, 3.9, 1.9 Hz, H<sub>5a</sub>), 4.32 (2H, s, H<sub>1</sub>), 4.18 (1H, ddd,  $J$  = 17.6, 3.9, 2.0 Hz, H<sub>5b</sub>), 3.89-3.74 (1H, m, H<sub>9a</sub>), 3.59-3.42 (1H, m, H<sub>9b</sub>), 1.90-1.40 (6H, m, H<sub>10</sub>, H<sub>11</sub>, and H<sub>12</sub>);  $\delta_{\text{C}}$  (50 MHz; CDCl<sub>3</sub>) 187.3, 147.7, 138.9, 134.4, 129.4 (2C), 128.6 (2C), 128.0, 98.4, 65.6, 65.3, 62.2, 30.5, 25.5, 19.3; EIHRMS: Calcd for C<sub>16</sub>H<sub>20</sub>O<sub>5</sub>S (M+Na): 347.0924; found: 347.0924 (M+Na). **1c**:  $\nu_{\max}$  (liquid film) 2943, 2872, 2852, 1693, 1666, 1614, 1448, 1377, 1323, 1155;  $\delta_{\text{H}}$  (200 MHz; CDCl<sub>3</sub>) 8.01-7.80 (2H, m, ArH<sub>ortho</sub>), 7.79-7.50 (3H, m, ArH<sub>meta</sub> and ArH<sub>para</sub>), 6.65-6.37 (2H, m, H<sub>3</sub> and H<sub>4</sub>), 4.75-4.39 (3H, m, H<sub>5</sub> and H<sub>7</sub>), 4.21 (2H, s, H<sub>1</sub>), 3.92-3.71 (1H, m, H<sub>9a</sub>), 3.58-3.38 (1H, m, H<sub>9b</sub>), 1.95-1.36 (6H, m, H<sub>10</sub>, H<sub>11</sub>, and H<sub>12</sub>);  $\delta_{\text{C}}$  (50

MHz; CDCl<sub>3</sub>) 187.4, 152.4, 138.8, 134.5, 129.6 (2C), 128.5 (2C), 124.7, 99.2, 68.1, 67.2, 62.8, 30.8, 25.6, 19.8; EIHRMS: Calcd for C<sub>16</sub>H<sub>20</sub>O<sub>5</sub>S (M+Na): 347.0924; found: 347.0924 (M+Na).

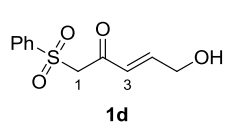

### 2.5. Deprotection of **1b** with *p*TsOH: (*E*)-5-hydroxy-1-(phenylsulfonyl)pent-3-en-2-one, **1d**.

**1b** (203 mg, 0.62 mmol) and *p*-toluenesulfonic acid monohydrate (12 mg, 0.06 mmol) were dissolved in 6 ml of a 1/1 mixture of THF/H<sub>2</sub>O, and the whole mixture was stirred for 5 days. The reaction was quenched with H<sub>2</sub>O, extracted with EtOAc and the combined organics were washed with NaHCO<sub>3</sub> (5%), H<sub>2</sub>O, brine, dried (Na<sub>2</sub>SO<sub>4</sub>), filtered and concentrated in vacuo to afford **1d** (130.2 mg, 88%).  $\nu_{\max}$  (liquid film) 3504, 2931, 1691, 1664, 1627, 1448, 1309, 1151;  $\delta_{\text{H}}$  (200 MHz; CDCl<sub>3</sub>) 7.93-7.82 (2H, m, ArH<sub>ortho</sub>), 7.72-7.50 (3H, m, ArH<sub>meta</sub> and ArH<sub>para</sub>), 7.04 (1H, dt,  $J$  = 15.8, 3.6 Hz, H4), 6.58 (1H, dt,  $J$  = 15.8, 2.0 Hz, H3), 4.38 (2H, m, H5), 4.33 (2H, s, H1);  $\delta_{\text{C}}$  (50 MHz; CDCl<sub>3</sub>) 187.2, 150.4, 138.8, 134.6, 129.6 (2C), 128.6 (2C), 127.1, 65.8, 62.0; EIHRMS: Calcd for C<sub>11</sub>H<sub>12</sub>O<sub>4</sub>S (M+Na): 263.0349; found: 263.0349 (M+Na).

### 3. General procedure for the synthesis of 2*H*-pyrans, **3a**-**3c**.

$\beta$ -oxosulfone (**1a**-**1d**) (17.6 mmol) and *E/Z*-citral (8.7 mmol) were dissolved in 1 ml of the isopropyl alcohol. Next, *L*-Proline (20 mol%), and additive (20 mol%) if needed, was added and left stirring for the appropriate time. All products were purified by flash chromatography on silica gel using different mixtures of hexane/EtOAc.

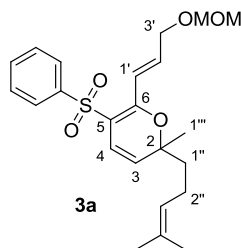

#### 3.1 (*E*)-6-(3-(methoxymethoxy)prop-1-en-1-yl)-2-methyl-2-(4-methylpent-3-en-1-yl)-5-(phenylsulfonyl)-2*H*-pyran, **3a**.

$\nu_{\max}$  (liquid film) 2926, 1674, 1539, 1446, 1377, 1321, 1151;  $\delta_{\text{H}}$  (400 MHz; CDCl<sub>3</sub>) 7.84 (2H, d,  $J$  = 8.3 Hz, ArH<sub>ortho</sub>), 7.59-7.41 (3H, m, ArH<sub>meta</sub>, ArH<sub>para</sub>), 7.42 (1H, dt,  $J$  = 15.4, 1.8 Hz, H1'), 6.56 (1H, dt,  $J$  = 15.4, 5.2 Hz, H2'), 6.36 (1H, d,  $J$  = 10.0 Hz, H4), 5.34 (1H, d,  $J$  = 10.0 Hz, H3), 5.05-4.93 (1H, m, H3'), 4.67 (2H, s, O-CH<sub>2</sub>-O), 4.25 (2H, dd,  $J$  = 5.2, 1.8 Hz, H3'), 3.39 (3H, s, O-CH<sub>3</sub>), 2.06-1.86 (2H, m, H2'), 1.63 (6H, s, (CH<sub>3</sub>)<sub>2</sub>-C4'), 1.40 (2H, m, H1'), 1.27 (3H, s, CH<sub>3</sub>-C2);  $\delta_{\text{C}}$  (101 MHz; CDCl<sub>3</sub>) 156.0, 143.0, 136.1, 132.6, 132.0, 129.0 (2C), 126.4 (2C), 124.2, 123.4, 121.5, 119.1, 114.3, 96.0, 80.6, 66.9, 55.4, 40.8, 25.7, 22.2, 17.7 (2C); EIHRMS: Calcd for C<sub>23</sub>H<sub>30</sub>O<sub>5</sub>S (M+Na): 441.1712; found: 441.1706 (M+Na).

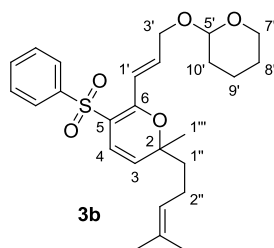

#### 3.2 (*E*)-2-methyl-2-(4-methylpent-3-en-1-yl)-5-(phenylsulfonyl)-6-(3-((tetrahydro-2*H*-pyran-2-yl)oxy)prop-1-en-1-yl)-2*H*-pyran, **3b**.

$\nu_{\max}$  (liquid film) 2926, 1647, 1537, 1446, 1377, 1321, 1153;  $\delta_{\text{H}}$  (200 MHz; CDCl<sub>3</sub>) 7.94-7.77 (2H, m, ArH<sub>ortho</sub>), 7.60-7.45 (3H, m, ArH<sub>meta</sub>, ArH<sub>para</sub>), 7.45-7.32 (1H, m, H1'), 6.58 (1H, dt,  $J$  = 15.3, 5.0 Hz, H2'), 6.38 (1H, d,  $J$  = 10.0 Hz, H4), 5.33 (1H, d,  $J$  = 10.0 Hz, H3), 5.05-4.92 (1H, m, H3'), 4.67 (1H, t,  $J$  = 3.2 Hz, O-CH-O), 4.50-4.33 (1H, m, H3'), 4.27-4.07 (1H, m, H3'), 3.94-3.76 (1H, m, H7'), 3.60-3.45 (1H, m, H7'), 2.06-1.86 (2H, m, H2'), 1.64 (6H, s, (CH<sub>3</sub>)<sub>2</sub>-C4'), 1.60-1.53 (4H, m, H10' and H1'), 1.53-1.44 (4H, m, H8' and H9'), 1.27 (3H, s, CH<sub>3</sub>-C2);  $\delta_{\text{C}}$  (50 MHz; CDCl<sub>3</sub>) 156.5, 143.4, 136.8, 132.8, 132.3, 129.2 (2C), 126.7 (2C), 124.3, 123.7, 121.3, 119.5, 114.3,

98.4, 80.8, 66.8, 62.3, 40.8, 30.7, 25.9, 25.8, 25.7, 22.5, 19.5, 17.8; EIHRMS: Calcd for  $C_{26}H_{34}O_5S$  (M+Na): 481.2025; found: 481.2019 (M+Na).

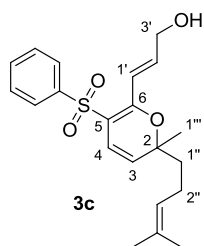

**3.3 (E)-3-(2-methyl-2-(4-methylpent-3-en-1-yl)-5-(phenylsulfonyl)-2H-pyran-6-yl)prop-2-en-1-ol, 3c.**

$\nu_{max}$  (liquid film) 3493, 2968, 2916, 2850, 1645, 1621, 1537, 1446, 1317, 1155, ;  $\delta_H$  (200 MHz;  $CDCl_3$ ) 7.91-7.78 (2H, m,  $ArH_{ortho}$ ), 7.60-7.47 (3H, m,  $ArH_{meta}$ ,  $ArH_{para}$ ), 7.41 (1H, dt,  $J = 15.3, 1.8$  Hz,  $H1'$ ), 6.64 (1H, dt,  $J = 15.3, 4.9$  Hz,  $H2'$ ), 6.36 (1H, d,  $J = 10.0$  Hz,  $H4$ ), 5.34 (1H, d,  $J = 10.0$  Hz,  $H3$ ), 5.07-4.94 (1H, m,  $H3''$ ), 4.43-4.30 (2H, m,  $H3'$ ), 2.02-1.88 (2H, m,  $H2''$ ), 1.76-1.51 (8H, m,  $H1''$  and  $(CH_3)_2-C4'$ ), 1.27 (3H, s,  $CH_3-C2$ );  $\delta_C$  (50 MHz;  $CDCl_3$ ) 156.3, 143.2, 139.2, 132.9, 132.3, 129.3 (2C), 126.7 (2C), 124.4, 123.6, 120.6, 119.4, 114.5, 80.9, 63.2, 40.8, 25.9, 25.8, 22.5, 17.8; EIHRMS: Calcd for  $C_{21}H_{26}O_4S$  (M+Na): 397.1444; found: 397.1444 (M+Na).

**4. General procedure for the synthesis of 2H-pyrans and Knoevenagel adducts.**

$\beta$ -oxosulfone **1a** (50 mg, 17.6 mmol) and the corresponding aldehyde (8.7 mmol) were dissolved in 1 ml of isopropyl alcohol. Next, *L*-Proline (20 mol%), and additive (20 mol%) if needed was added and left stirring for the appropriate time. All products were purified by flash chromatography on silica gel using different mixtures of hexane:EtOAc.

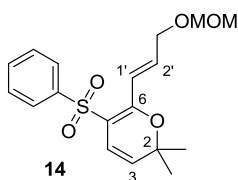

**4.1 (E)-6-(3-(methoxymethoxy)prop-1-en-1-yl)-2,2-dimethyl-5-(phenylsulfonyl)-2H-pyran, 14.**

$\nu_{max}$  (liquid film) 2935, 1647, 1537, 1446, 1379, 1319, 1153;  $\delta_H$  (200 MHz;  $CDCl_3$ ) 7.85 (2H, dd,  $J = 7.9, 1.7$  Hz,  $ArH_{ortho}$ ), 7.59-7.41 (3H, m,  $ArH_{meta}$ ,  $ArH_{para}$ ), 7.39 (1H, dt,  $J = 15.4, 1.7$  Hz,  $H1'$ ), 6.57 (1H, dt,  $J = 15.4, 5.2$  Hz,  $H2'$ ), 6.33 (1H, d,  $J = 9.9$  Hz,  $H4$ ), 5.38 (1H, d,  $J = 9.9$  Hz,  $H3$ ), 4.68 (2H, s,  $O-CH_2-O$ ), 4.25 (2H, dd,  $J = 5.2, 1.7$  Hz,  $H3'$ ), 3.39 (3H, s,  $O-CH_3$ ), 1.31 (6H, s,  $(CH_3)_2-C2$ );  $\delta_C$  (50 MHz;  $CDCl_3$ ) 156.2, 143.3, 137.1, 132.9, 129.3 (2C), 126.7 (2C), 125.5, 121.9, 119.1, 114.9, 96.3, 78.3, 67.2, 55.6, 27.4 (2C); EIHRMS: Calcd for  $C_{18}H_{22}O_5S$  (M+Na): 373.1086; found: 373.1080 (M+Na).

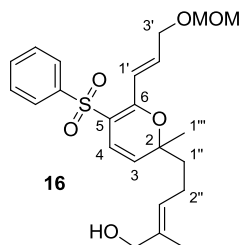

**4.2 (E)-5-(6-((E)-3-(methoxymethoxy)prop-1-en-1-yl)-2-methyl-5-(phenylsulfonyl)-2H-pyran-2-yl)-2-methylpent-2-en-1-ol, 16.**

$\nu_{max}$  (liquid film) 3469, 2934, 2889, 1649, 1537, 1446, 1307, 1213, 1151;  $\delta_H$  (200 MHz;  $CDCl_3$ ) 7.84 (2H, d,  $J = 7.9$  Hz,  $ArH_{ortho}$ ), 7.62-7.35 (4H, m,  $ArH_{meta}$ ,  $ArH_{para}$  and  $H1'$ ), 6.56 (1H, dt,  $J = 15.3, 5.4$  Hz,  $H2'$ ), 6.37 (1H, d,  $J = 10.1$  Hz,  $H4$ ), 5.39-5.22 (2H, m,  $H3$  and  $H3''$ ), 4.67 (2H, s,  $O-CH_2-O$ ), 4.25 (2H, d,  $J = 4.7$  Hz,  $H3'$ ), 3.94 (2H, s,  $CH_2-OH$ ), 3.39 (3H, s,  $O-CH_3$ ), 2.12-1.95 (2H, m,  $H2''$ ), 1.80-1.58 (2H, m,  $H1''$ ), 1.55 (3H, s,  $CH_3-C4'$ ), 1.25 (3H, s,  $CH_3-C2$ );  $\delta_C$  (50 MHz;  $CDCl_3$ ) 156.2, 143.2, 136.4, 135.5, 132.9, 129.3 (2C), 126.7 (2C), 125.0, 124.3, 121.8, 119.6, 114.5, 96.3, 80.9, 68.8, 67.2, 55.6, 40.5, 26.1, 22.2, 13.8; EIHRMS: Calcd for  $C_{23}H_{30}O_6S$  (M+Na): 457.1655; found: 457.1655 (M+Na).

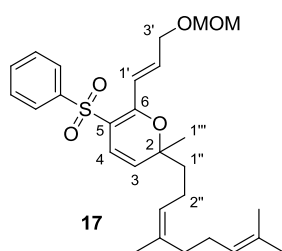

**4.3 2-((E)-4,8-dimethylnona-3,7-dien-1-yl)-6-((E)-3-(methoxymethoxy)prop-1-en-1-yl)-2-methyl-5-(phenylsulfonyl)-2H-pyran, 17.**

$v_{max}$  (liquid film) 2926, 1649, 1539, 1446, 1379, 1321, 1151;  $\delta_H$  (200 MHz;  $CDCl_3$ ) 7.85 (2H, dd,  $J = 7.9, 1.7$  Hz,  $ArH_{ortho}$ ), 7.59-7.44 (3H, m,  $ArH_{meta}$ ,  $ArH_{para}$ ), 7.40 (1H, dt,  $J = 15.3, 1.7$  Hz,  $H1'$ ), 6.57 (1H, dt,  $J = 15.3, 5.2$  Hz,  $H2'$ ), 6.36 (1H, d,  $J = 10.0$  Hz,  $H4$ ), 5.35 (1H, d,  $J = 10.0$  Hz,  $H3$ ), 5.13-4.91 (2H, m,  $H3''$  and  $H7''$ ), 4.68 (2H, s, O-CH<sub>2</sub>-O), 4.25 (2H, dd,  $J = 5.2, 1.7$  Hz,  $H3'$ ), 3.40 (3H, s, O-CH<sub>3</sub>), 2.11-1.85 (8H, m,  $H1''$ ,  $H2''$ ,  $H5''$  and  $H6''$ ), 1.67 (3H, s, CH<sub>3</sub>-C4'), 1.59 (3H, s, CH<sub>3a</sub>-C8'), 1.50 (3H, s, CH<sub>3b</sub>-C8'), 1.28 (3H, s, CH<sub>3</sub>-C2);  $\delta_C$  (50 MHz;  $CDCl_3$ ) 156.3, 143.3, 136.4, 136.0, 132.8, 131.6, 129.5 (2C), 126.7 (2C), 124.5, 124.4, 123.5, 121.9, 119.4, 114.6, 96.3, 80.9, 67.2, 55.6, 40.8, 39.8, 26.8, 26.0 (2C), 22.4, 17.9, 16.1; EIHRMS: Calcd for C<sub>28</sub>H<sub>38</sub>O<sub>5</sub>S (M+Na): 509.2338; found: 509.2332 (M+Na).

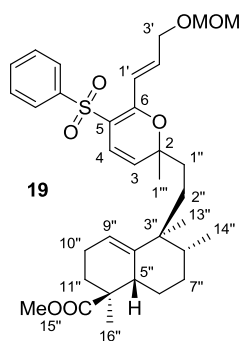

**4.4 (1S,5S,6R,8aS)-methyl 5-(3-(6-((E)-3-(methoxymethoxy)prop-1-en-1-yl)-2-methyl-5-phenylsulfonyl)-2H-pyran-2-yl)propyl)-1,5,6-trimethyl-1,2,3,5,6,7,8,8a-octahydronaphthalene-1-carboxylate, 19.**

*Caution: the name does not correspond to the numeration used.*

$[\alpha]_D^{25} = +35.4$  (c 1.07,  $CHCl_3$ );  $v_{max}$  (liquid film) 2932, 2874, 1726, 1539, 1446, 1321, 1157;  $\delta_H$  (400 MHz;  $CDCl_3$ ) 7.86 (2H, d,  $J = 7.3$  Hz,  $ArH_{ortho}$ ), 7.59-7.41 (3H, m,  $ArH_{meta}$ ,  $ArH_{para}$ ), 7.41 (1H, m,  $H1'$ ), 6.59 (1H, m,  $H2'$ ), 6.37 (1H, dd,  $J = 9.8, 3.0$  Hz,  $H4$ ), 5.33 (1H, d,  $J = 9.8$  Hz,  $H3$ ), 5.29-5.17 (1H, m,  $H9''$ ), 4.68 (2H, s, O-CH<sub>2</sub>-O), 4.26 (2H, d,  $J = 5.2$  Hz,  $H3'$ ), 3.61 (3H, s, COO-CH<sub>3</sub>), 3.40 (3H, s, O-CH<sub>3</sub>), 2.65-2.50 (1H, m,  $H5''$ ), 1.97-0.65 (25H, m,  $H1''$ ,  $H2''$ ,  $H6''$ ,  $H7''$ ,  $H8''$ ,  $H10''$ ,  $H11''$ ,  $H13''$ ,  $H14''$ ,  $H16''$ ,  $H1''$ );  $\delta_C$  (101 MHz;  $CDCl_3$ ) 178.3, 156.3, 143.1, 141.1, 135.9, 132.5, 129.0 (2C), 126.4 (2C), 124.8, 121.5, 119.8, 119.1, 114.3, 96.0, 80.9, 67.1, 55.3, 51.6, 44.8, 42.7, 38.3 (2C), 34.6, 31.4, 30.6, 28.6, 26.2, 22.9, 22.8, 22.3, 19.9, 15.4; EIHRMS: Calcd for C<sub>34</sub>H<sub>46</sub>O<sub>7</sub>S (M+Na): 621.2856; found: 621.2856 (M+Na).

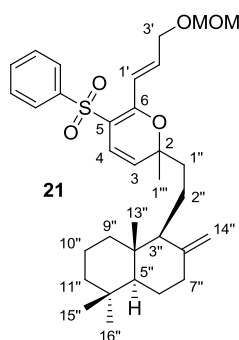

**4.5 6-((E)-3-(methoxymethoxy)prop-1-en-1-yl)-2-methyl-5-(phenylsulfonyl)-2-((1S,4aS,8aS)-5,5,8a-trimethyl-2-methylenedecahydronaphthalen-1-yl)ethyl)-2H-pyran, 21.**

*Caution: the name does not correspond to the numeration used.*

$[\alpha]_D^{25} = +4.58$  (c 0.3,  $CHCl_3$ );  $v_{max}$  (liquid film) 2918, 2848, 1539, 1446, 1321, 1153;  $\delta_H$  (200 MHz;  $CDCl_3$ ) 7.85 (2H, dd,  $J = 7.6, 1.6$  Hz,  $ArH_{ortho}$ ), 7.60-7.47 (3H, m,  $ArH_{meta}$ ,  $ArH_{para}$ ), 7.40 (1H, m,  $H1'$ ), 6.56 (1H, dt,  $J = 10.1, 5.4$  Hz,  $H2'$ ), 6.36 (1H, dd,  $J = 10.1, 1.3$  Hz,  $H4$ ), 5.34 (1H, d,  $J = 10.1$  Hz,  $H3$ ), 4.74 (1H, s,  $H29''_a$ ), 4.68 (2H, s, O-CH<sub>2</sub>-O), 4.38 (1H, s,  $H29''_b$ ), 4.25 (2H, d,  $J = 5.4$  Hz,  $H3'$ ), 3.40 (3H, s, O-CH<sub>3</sub>), 2.44-0.87 (28H, m,  $H1''$ ,  $H2''$ ,  $H3''$ ,  $H5''$ ,  $H6''$ ,  $H7''$ ,  $H9''$ ,  $H10''$ ,  $H11''$ ,  $H13''$ ,  $H15''$ ,  $H16''$ ,  $H1''$ );  $\delta_C$  (50 MHz;  $CDCl_3$ ) 156.3, 148.5, 143.4, 136.4, 132.8, 129.3 (2C), 126.7 (2C), 124.6, 121.8, 119.5, 114.5, 106.6, 96.2, 81.3, 67.2, 57.3, 55.7, 55.6, 42.4, 40.1, 40.0, 39.1, 38.5, 33.8, 33.5, 26.2, 24.6, 21.9, 19.6, 19.2, 14.6; EIHRMS: Calcd for C<sub>33</sub>H<sub>46</sub>O<sub>5</sub>S (M+Na): 577.2958; found: 577.2958 (M+Na).

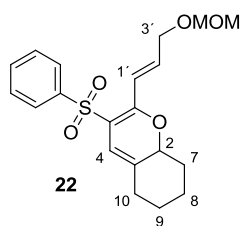

**4.6 (E)-2-(3-(methoxymethoxy)prop-1-en-1-yl)-3-(phenylsulfonyl)-6,7,8a-tetrahydro-5H-chromene, 22.**

$\nu_{\max}$  (liquid film) 2933, 1722, 1446, 1321, 1151;  $\delta_{\text{H}}$  (200 MHz;  $\text{CDCl}_3$ ) 7.86 (2H, dd,  $J = 7.8, 1.7$  Hz,  $\text{ArH}_{\text{ortho}}$ ), 7.64-7.44 (3H, m,  $\text{ArH}_{\text{meta}}$  and  $\text{ArH}_{\text{para}}$ ), 7.36 (1H, dd,  $J = 14.9, 1.7$  Hz,  $\text{H1}'$ ), 6.48 (1H, dt,  $J = 14.9, 5.4$  Hz,  $\text{H2}'$ ), 5.98 (1H, s,  $\text{H4}$ ), 4.91-4.73 (1H, m,  $\text{H2}$ ), 4.66 (2H, s,  $\text{O-CH}_2\text{-O}$ ), 4.23 (2H, d,  $J = 5.4$  Hz,  $\text{H3}'$ ), 3.39 (3H, s,  $\text{O-CH}_3$ ), 2.45-1.18 (8H, m,  $\text{H7}$ ,  $\text{H8}$ ,  $\text{H9}$ , and  $\text{H10}$ );  $\delta_{\text{C}}$  (50 MHz;  $\text{CDCl}_3$ ) 155.0, 145.3, 134.7, 133.5, 132.8, 129.3 (2C), 126.8 (2C), 121.5, 116.9, 112.2, 96.2, 77.4, 67.2, 55.6, 34.5, 32.5, 26.3, 24.1; EIHRMS: Calcd for  $\text{C}_{20}\text{H}_{24}\text{O}_5\text{S}$  ( $\text{M}+\text{Na}$ ): 399.1237; found: 399.1237 ( $\text{M}+\text{Na}$ ).

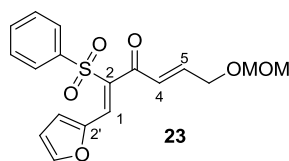

**4.7 (1Z,4E)-1-(furan-2-yl)-6-(methoxymethoxy)-2-(phenylsulfonyl)hexa-1,4-dien-3-one, 23.**

$\nu_{\max}$  (liquid film) 2947, 2889, 1659, 1622, 1446, 1319, 1197, 1149;  $\delta_{\text{H}}$  (400 MHz;  $\text{CDCl}_3$ ) 7.86 (2H, dd,  $J = 8.4, 1.3$  Hz,  $\text{ArH}_{\text{ortho}}$ ), 7.64-7.57 (2H, m,  $\text{H1}$  and  $\text{ArH}_{\text{para}}$ ), 7.57-7.49 (2H, m,  $\text{ArH}_{\text{meta}}$ ), 7.49-7.43 (1H, m,  $\text{H5}'$ ), 6.84 (1H, dt,  $J = 16.0, 4.1$  Hz,  $\text{H5}$ ), 6.78 (1H, d,  $J = 3.5$  Hz,  $\text{H3}'$ ), 6.54 (1H, dt,  $J = 16.0, 2.0$  Hz,  $\text{H4}$ ), 6.46 (1H, dd,  $J = 3.5, 1.8$  Hz,  $\text{H4}'$ ), 4.60 (2H, s,  $\text{O-CH}_2\text{-O}$ ), 4.21 (2H, dd,  $J = 4.1, 2.0$  Hz,  $\text{H6}$ ), 3.33 (3H, s,  $\text{O-CH}_3$ );  $\delta_{\text{C}}$  (101 MHz;  $\text{CDCl}_3$ ) 190.1, 147.9, 147.5, 146.9, 139.8, 135.7, 133.6, 129.8, 129.1 (2C), 128.3 (2C), 126.9, 119.3, 112.8, 96.0, 65.7, 55.4; EIHRMS: Calcd for  $\text{C}_{18}\text{H}_{18}\text{O}_6\text{S}$  ( $\text{M}+\text{Na}$ ): 385.0716; found: 385.0716 ( $\text{M}+\text{Na}$ ).

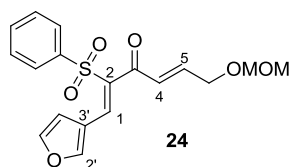

**4.8 (1Z,4E)-1-(furan-3-yl)-6-(methoxymethoxy)-2-(phenylsulfonyl)hexa-1,4-dien-3-one, 24.**

$\nu_{\max}$  (liquid film) 2949, 2889, 1654, 1622, 1446, 1309, 1205, 1149;  $\delta_{\text{H}}$  (400 MHz;  $\text{CDCl}_3$ ) 7.85 (2H, dd,  $J = 8.5, 1.3$  Hz,  $\text{ArH}_{\text{ortho}}$ ), 7.74 (1H, dd,  $J = 1.1, 0.5$  Hz,  $\text{H1}$ ), 7.72-7.71 (1H, m,  $\text{H2}'$ ), 7.63-7.58 (1H, m,  $\text{ArH}_{\text{para}}$ ), 7.55-7.49 (2H, m,  $\text{ArH}_{\text{meta}}$ ), 7.40-7.35 (1H, m,  $\text{H5}'$ ), 6.92 (1H, dt,  $J = 15.9, 4.0$  Hz,  $\text{H5}$ ), 6.55 (1H, dt,  $J = 15.9, 2.1$  Hz,  $\text{H4}$ ), 6.29 (1H, dtd,  $J = 1.4, 0.9, 0.4$  Hz,  $\text{H4}'$ ), 4.60 (2H, s,  $\text{O-CH}_2\text{-O}$ ), 4.22 (2H, dd,  $J = 4.0, 2.1$  Hz,  $\text{H6}$ ), 3.33 (3H, s,  $\text{O-CH}_3$ );  $\delta_{\text{C}}$  (101 MHz;  $\text{CDCl}_3$ ) 191.2, 149.5, 147.3, 144.7, 139.7, 138.1, 136.6, 131.6, 129.1 (2C), 129.0, 128.3 (2C), 119.0, 109.3, 96.0, 65.7, 55.4; EIHRMS: Calcd for  $\text{C}_{18}\text{H}_{18}\text{O}_6\text{S}$  ( $\text{M}+\text{Na}$ ): 385.0716; found: 385.0716 ( $\text{M}+\text{Na}$ ).

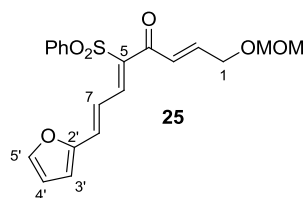

**4.9 (2E,5Z,7E)-8-(furan-2-yl)-1-(methoxymethoxy)-5-(phenylsulfonyl)octa-2,5,7-trien-4-one, 25.**

$\nu_{\max}$  (liquid film) 2933, 2889, 1647, 1616, 1583, 1463, 1446, 1307, 1147;  $\delta_{\text{H}}$  (400 MHz;  $\text{CDCl}_3$ ) 7.88 (2H, d,  $J = 7.9$  Hz,  $\text{ArH}_{\text{ortho}}$ ), 7.72-7.43 (5H, m,  $\text{H6}$ ,  $\text{ArH}_{\text{meta}}$ ,  $\text{ArH}_{\text{para}}$  and  $\text{H5}'$ ), 7.00-6.80 (3H, m,  $\text{H2}$ ,  $\text{H7}$  and  $\text{H8}$ ), 6.71 (1H, d,  $J = 15.7$  Hz,  $\text{H3}$ ), 6.60 (1H, m,  $\text{H3}'$ ), 6.48 (1H, m,  $\text{H4}'$ ), 4.65 (2H, s,  $\text{O-CH}_2\text{-O}$ ), 4.33-4.22 (2H, m,  $\text{H1}$ ), 3.37 (3H, s,  $\text{O-CH}_3$ );  $\delta_{\text{C}}$  (101 MHz;  $\text{CDCl}_3$ ) 188.5, 151.5, 148.0, 145.1, 143.5, 140.5, 138.6, 133.4, 132.2, 129.0 (3C), 128.1 (2C), 119.9, 114.9, 112.6, 96.1, 65.9, 55.4; EIHRMS: Calcd for  $\text{C}_{20}\text{H}_{20}\text{O}_6\text{S}$  ( $\text{M}+\text{Na}$ ): 411.0873; found: 411.0873 ( $\text{M}+\text{Na}$ ).

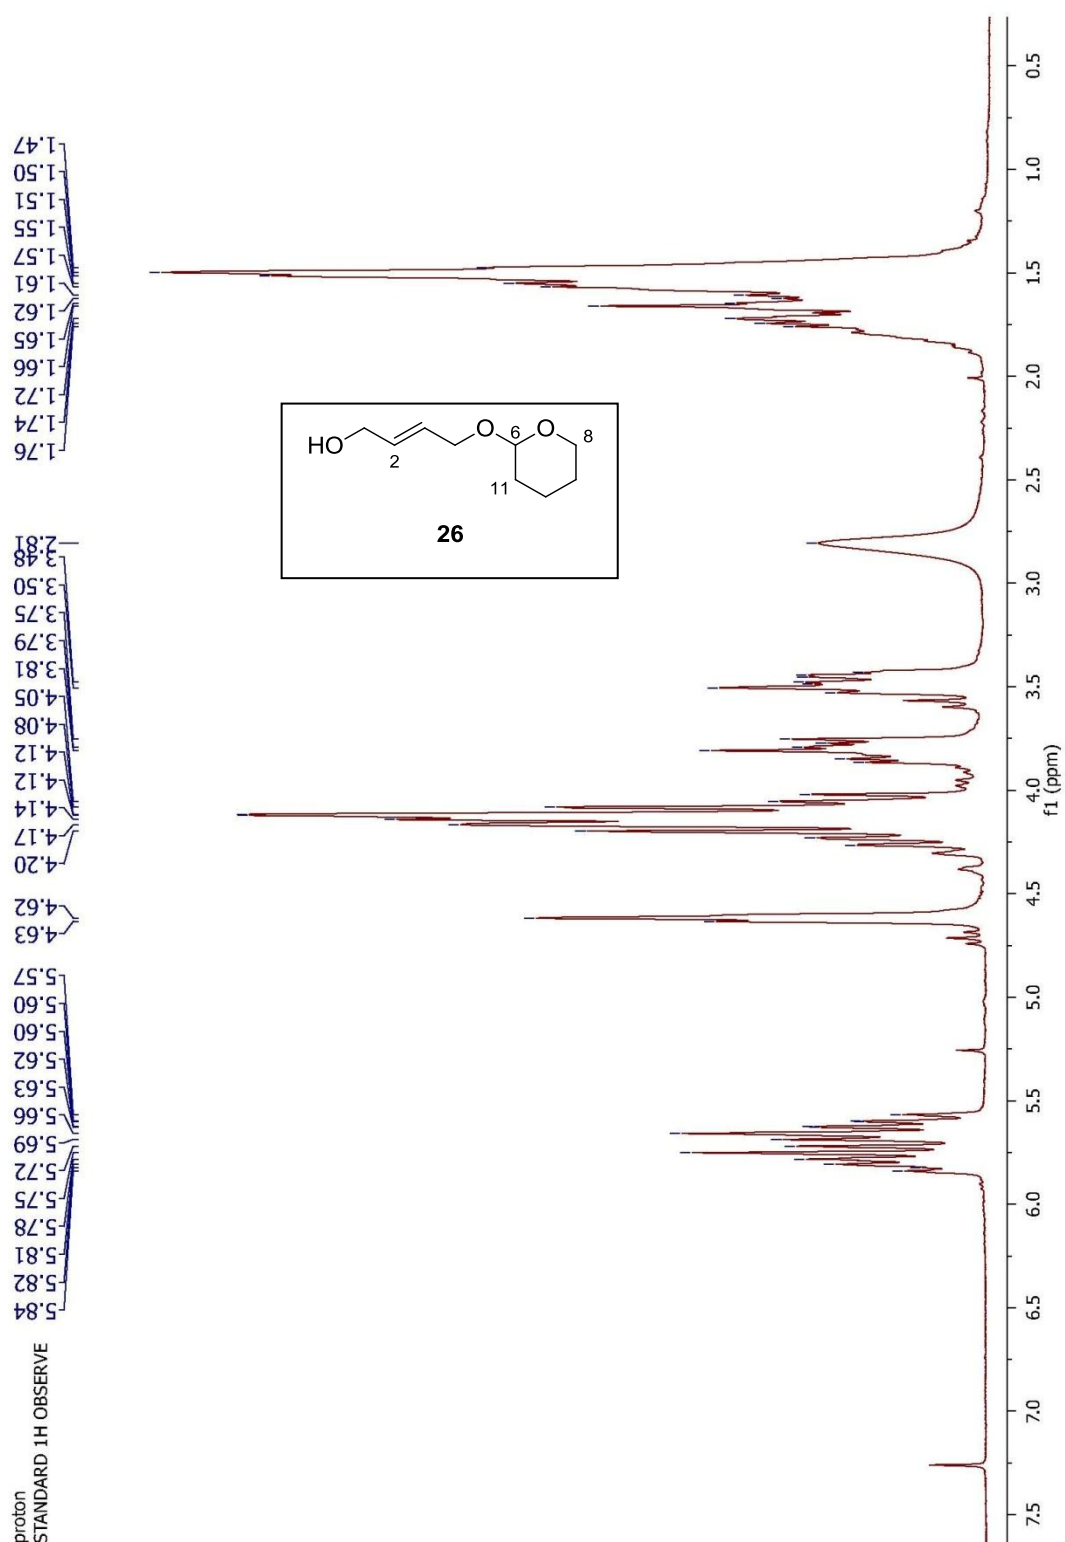



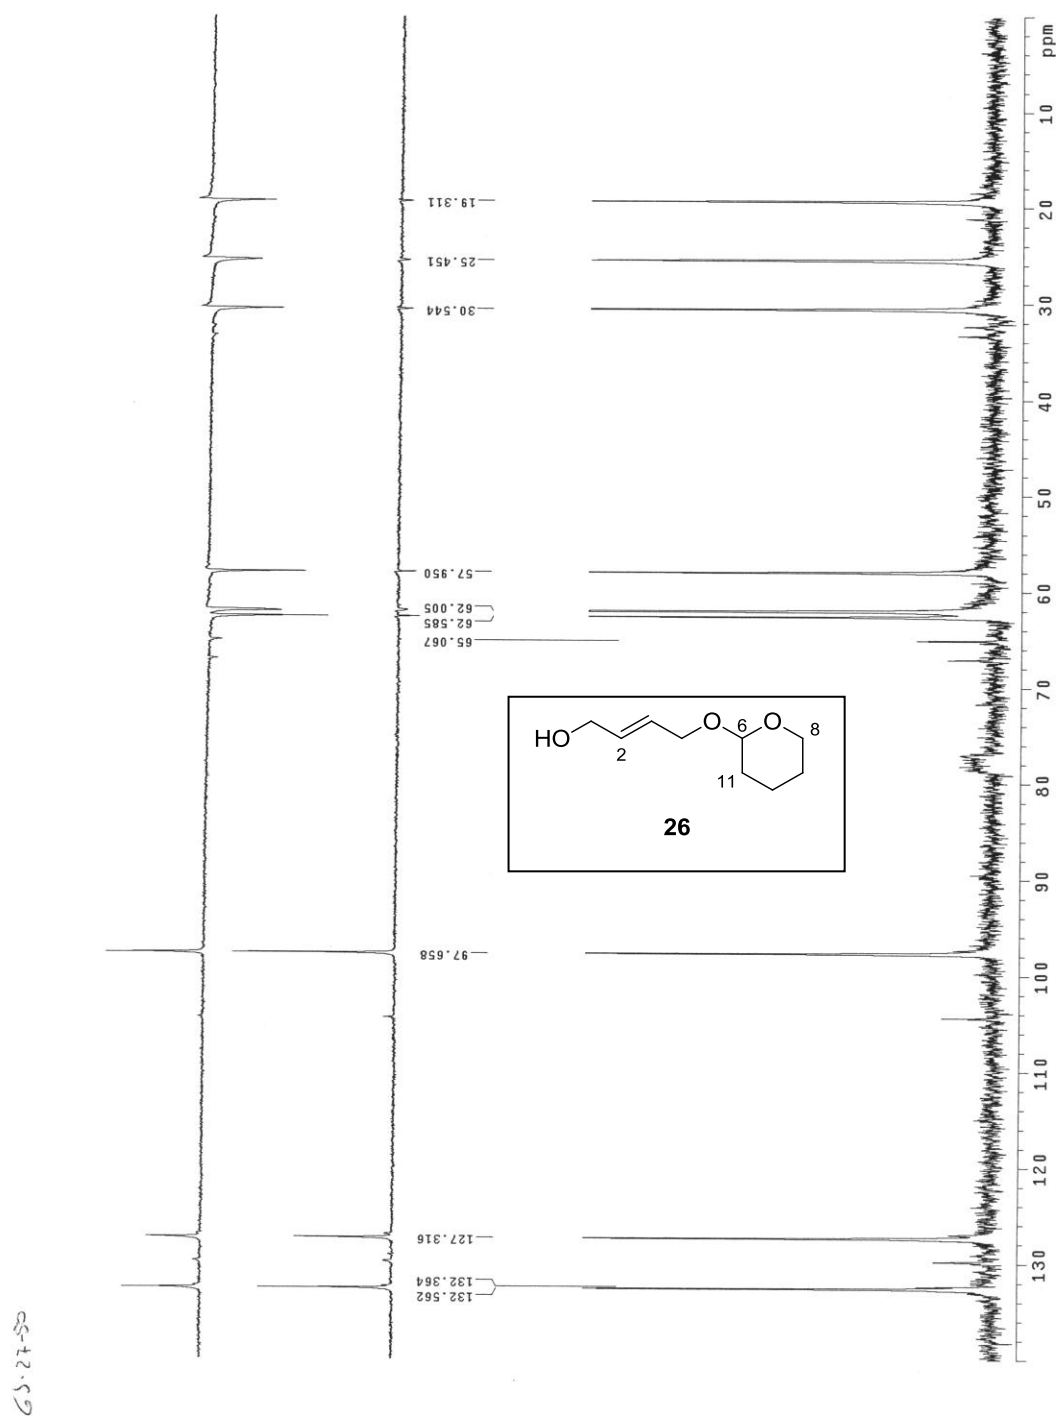

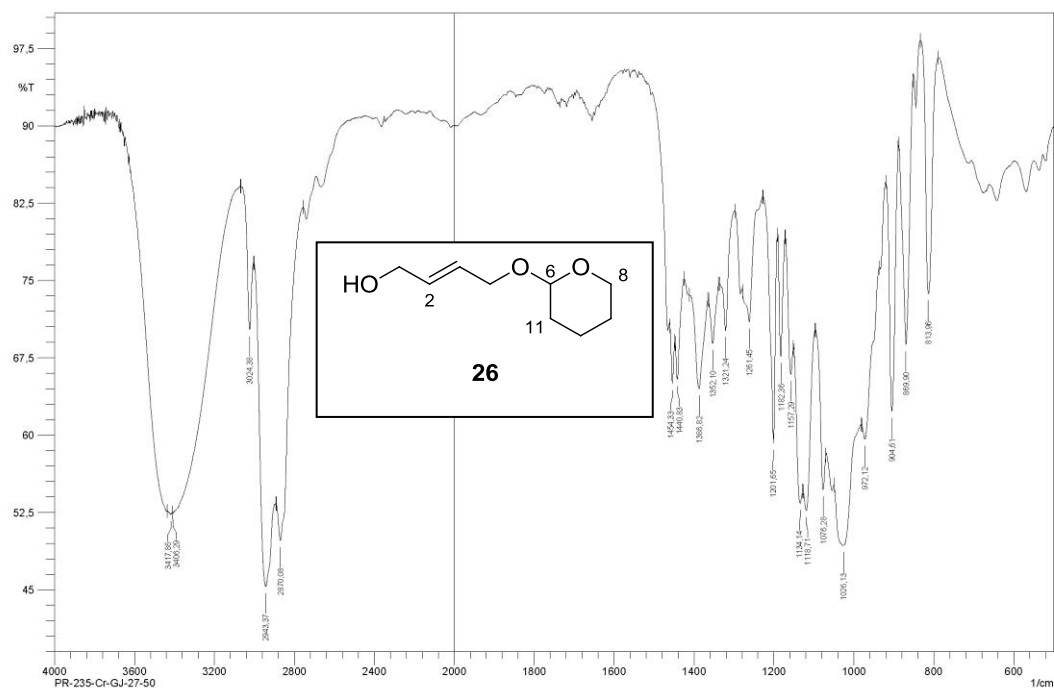

S. G. Espectrometría de Masas

Plaza de los Caídos 1-5

página 1 de 1

Emitido por: César Raposo

37008 Salamanca

10/11/2011

(Responsable SGEM)

Masa exacta

+TOF MS: 0.934 min from Sample 5 (Cr-GJ-27-50) of oct1011113.wiff

Max. 2005.0 counts.

a=3.56671390090838620e-004, t0=3.50372002432777660e+001 R;

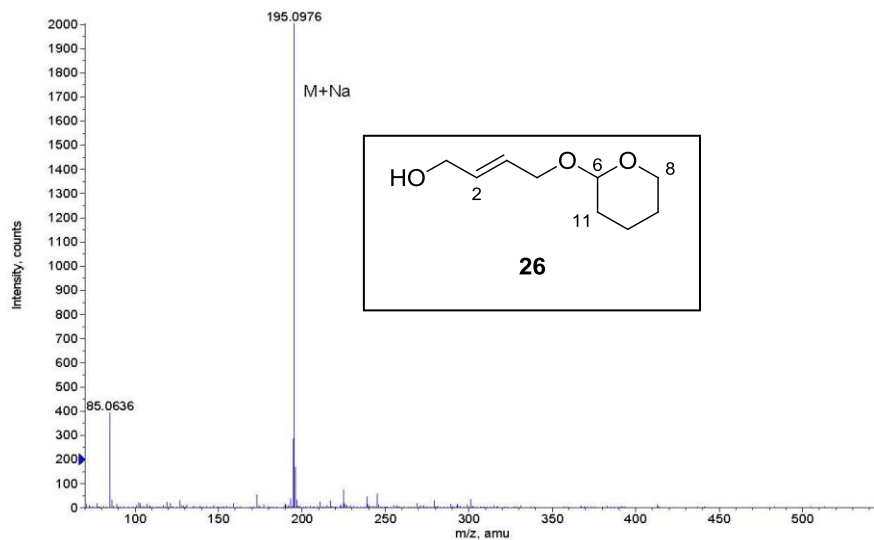

| Formula        | CalculatedMass | mDaError  | ppmError  | RDB |
|----------------|----------------|-----------|-----------|-----|
| C6 H15 N2 O5   | 195.097548     | 0.051764  | 0.265323  | 0.5 |
| C5 H12 N6 O Na | 195.09648      | 1.119712  | 5.739224  | 2.5 |
| C7 H11 N6 O    | 195.098886     | -1.285548 | -6.589237 | 5.5 |
| C9 H16 O3 Na   | 195.099166     | -1.56568  | -8.025089 | 1.5 |

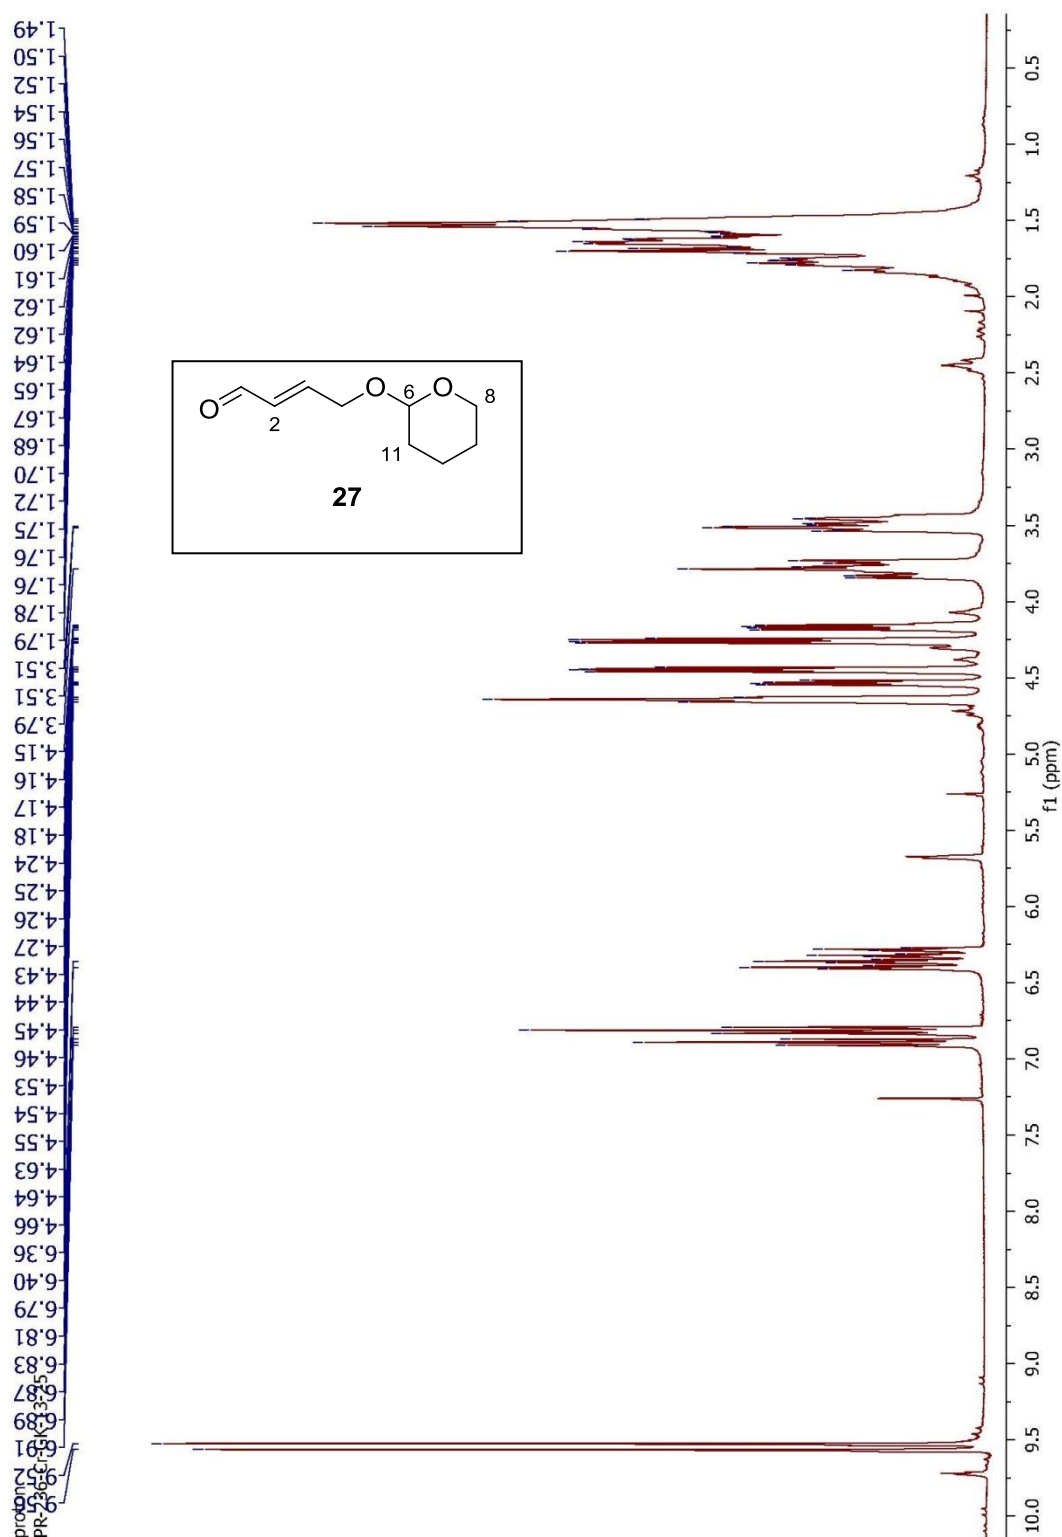

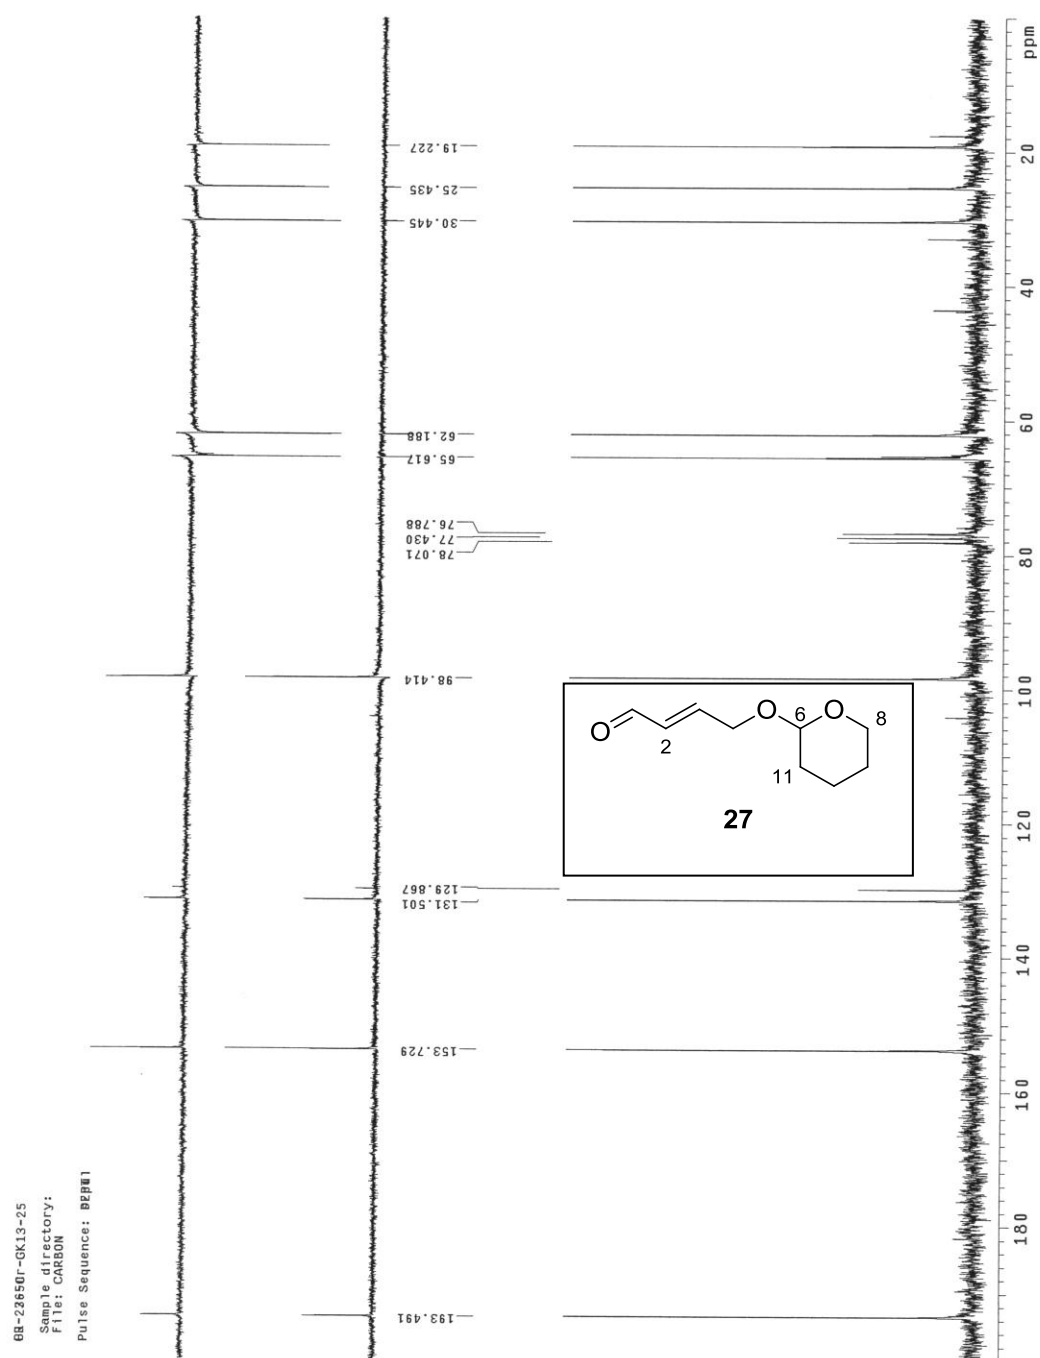

RSC Advances

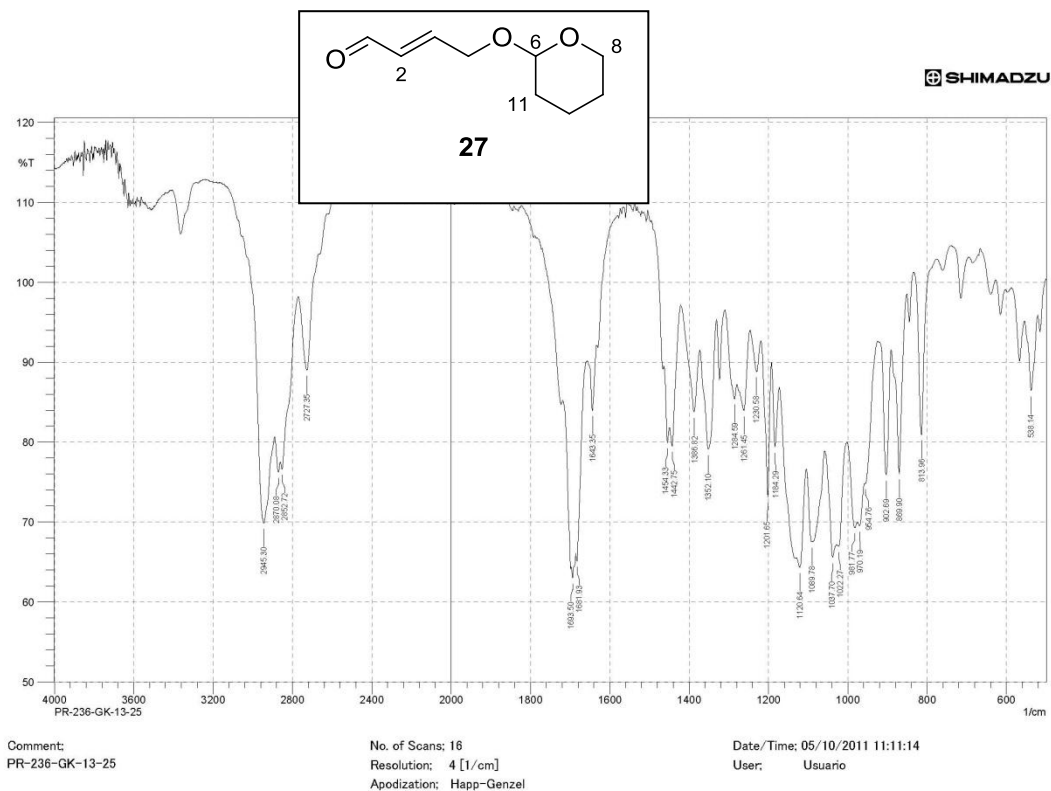

S. G. Espectrometria de Masas  
Emitido por: César Raposo  
(Responsable SGEM)

Plaza de los Caídos 1-5  
37008 Salamanca

página 1 de 1  
10/11/2011

+TOF MS: 0.301 min from Sample 2 (Cr-GK-13-25) of oct1011114.wiff  
a=3.56671390090838620e-004, t0=3.50372002432777660e+001 R., subtracted (0.034 to ...)

Masa exacta  
Max. 1320.7 counts.

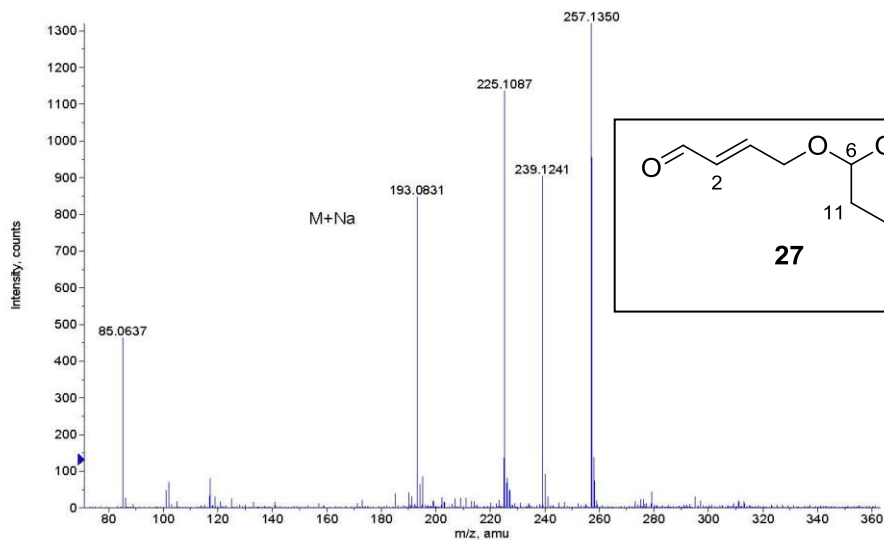

| Formula      | CalculatedMass | mDaError  | ppmError  | RDB |
|--------------|----------------|-----------|-----------|-----|
| C7 H9 N6 O   | 193.083235     | -0.135468 | -0.701603 | 6.5 |
| C9 H14 O3 Na | 193.083516     | -0.4156   | -2.152435 | 2.5 |
| C6 H13 N2 O5 | 193.081898     | 1.201844  | 6.224473  | 1.5 |

RSC Advances

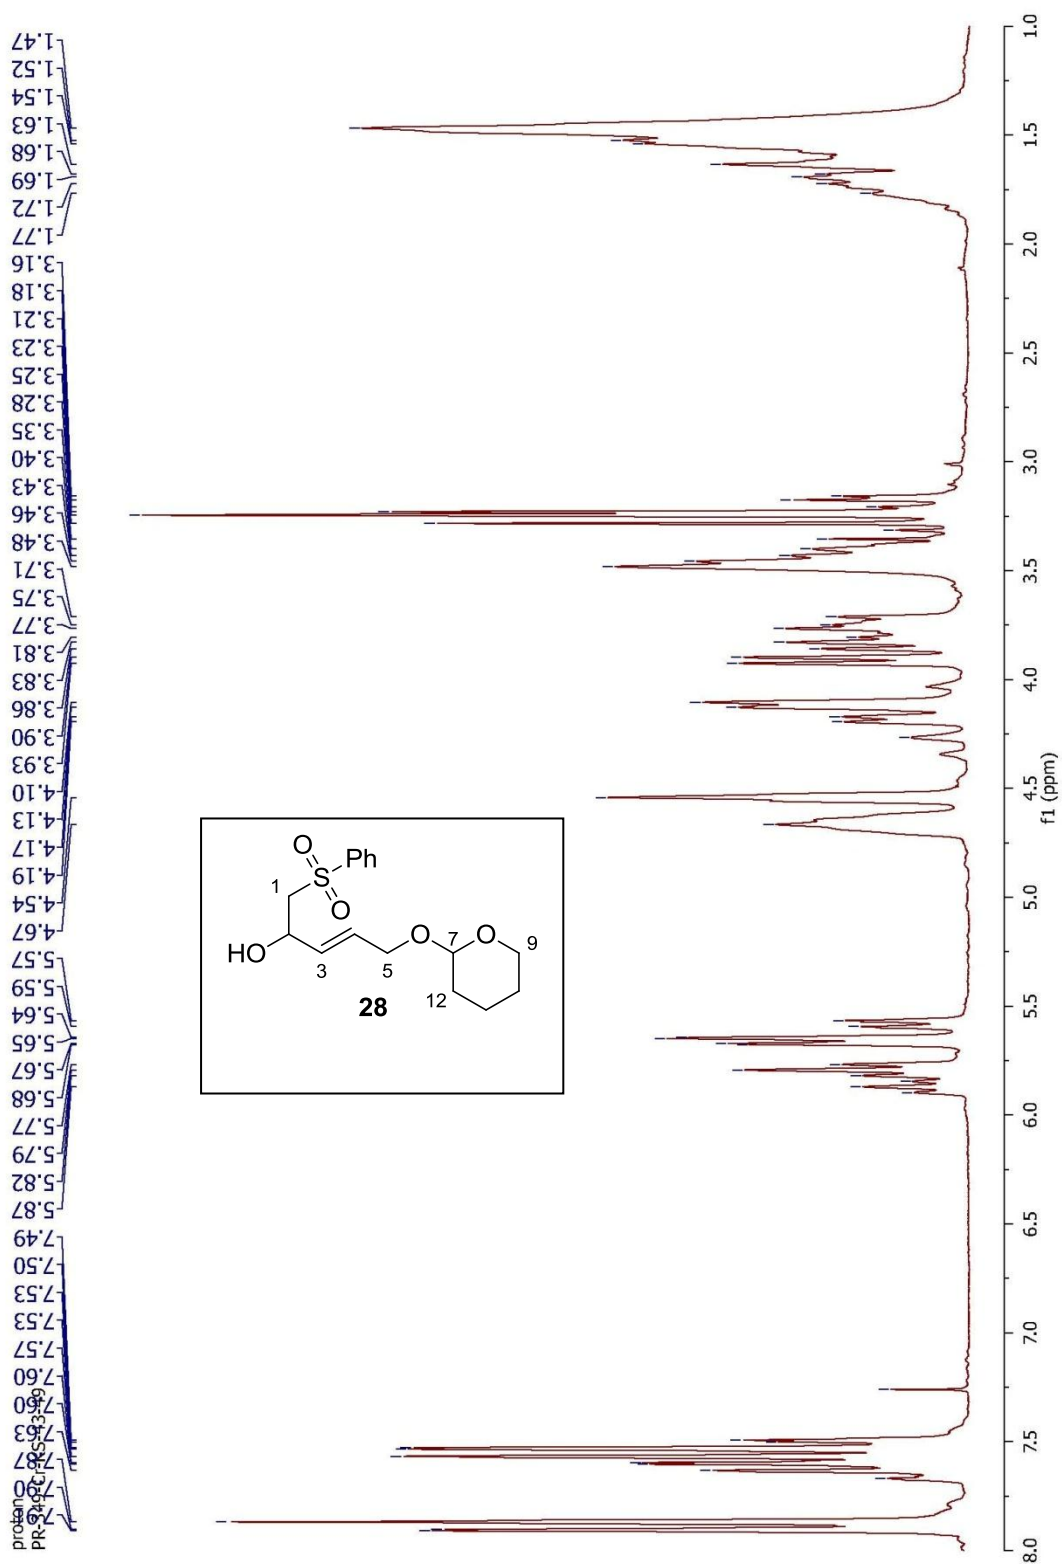

RSC Advances

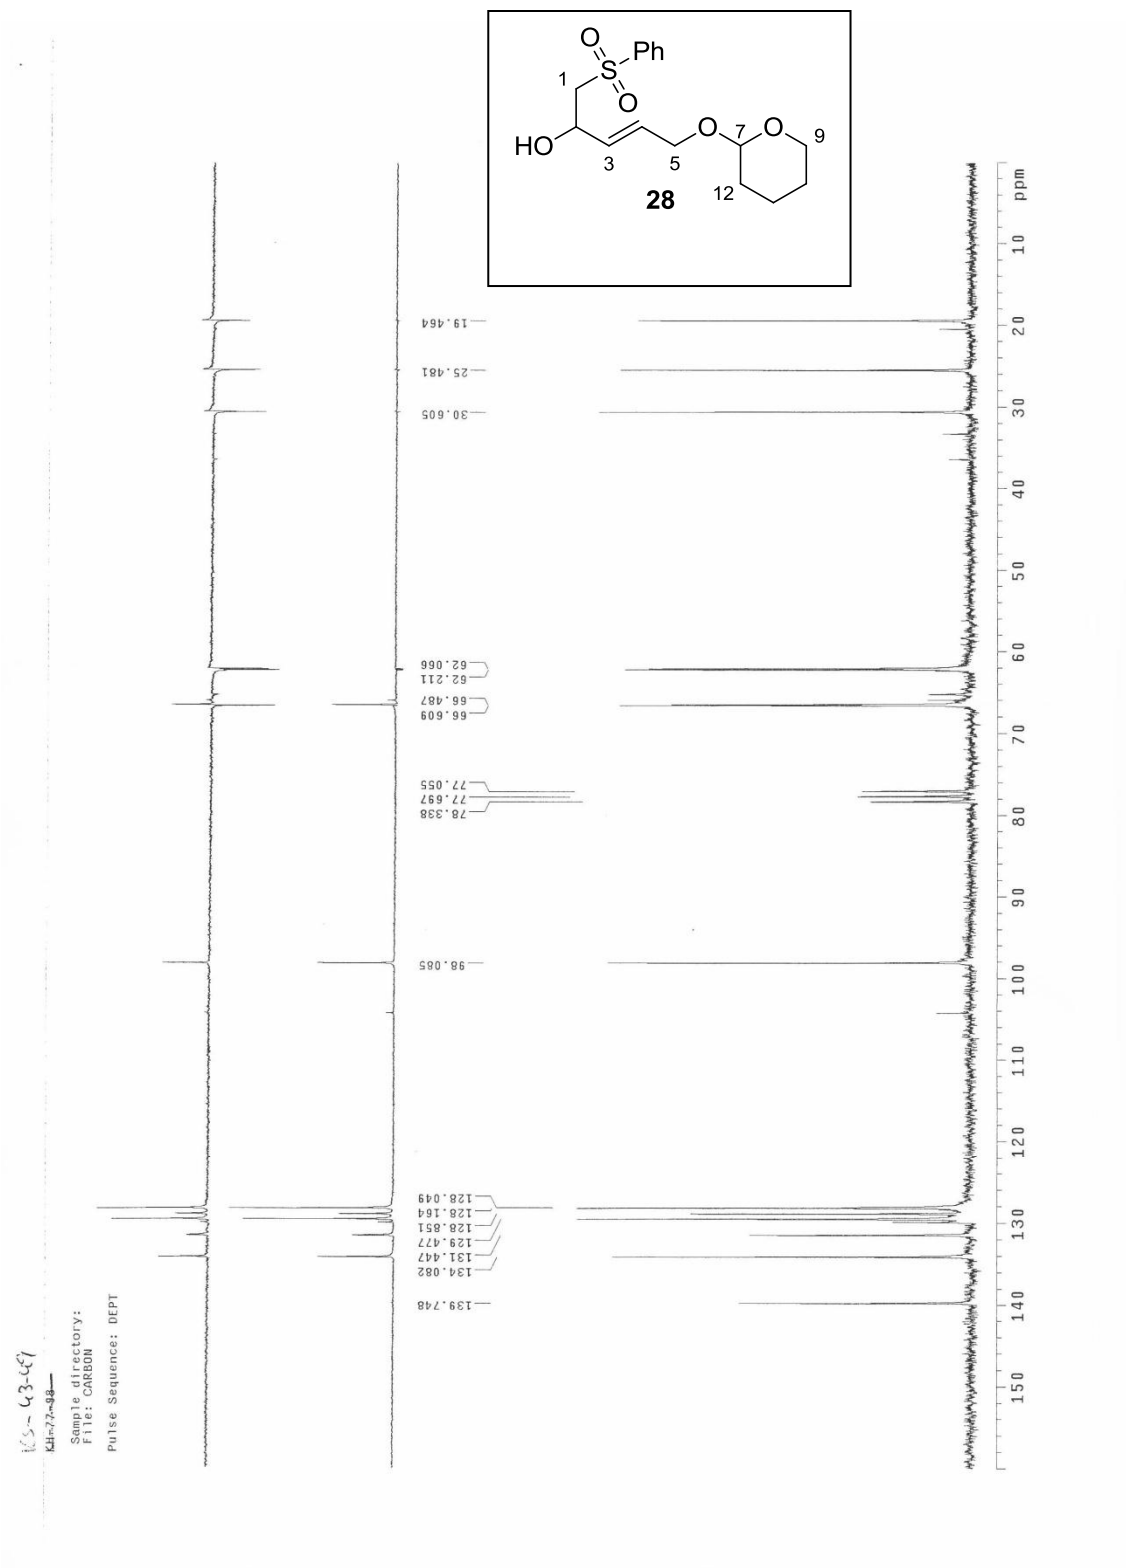

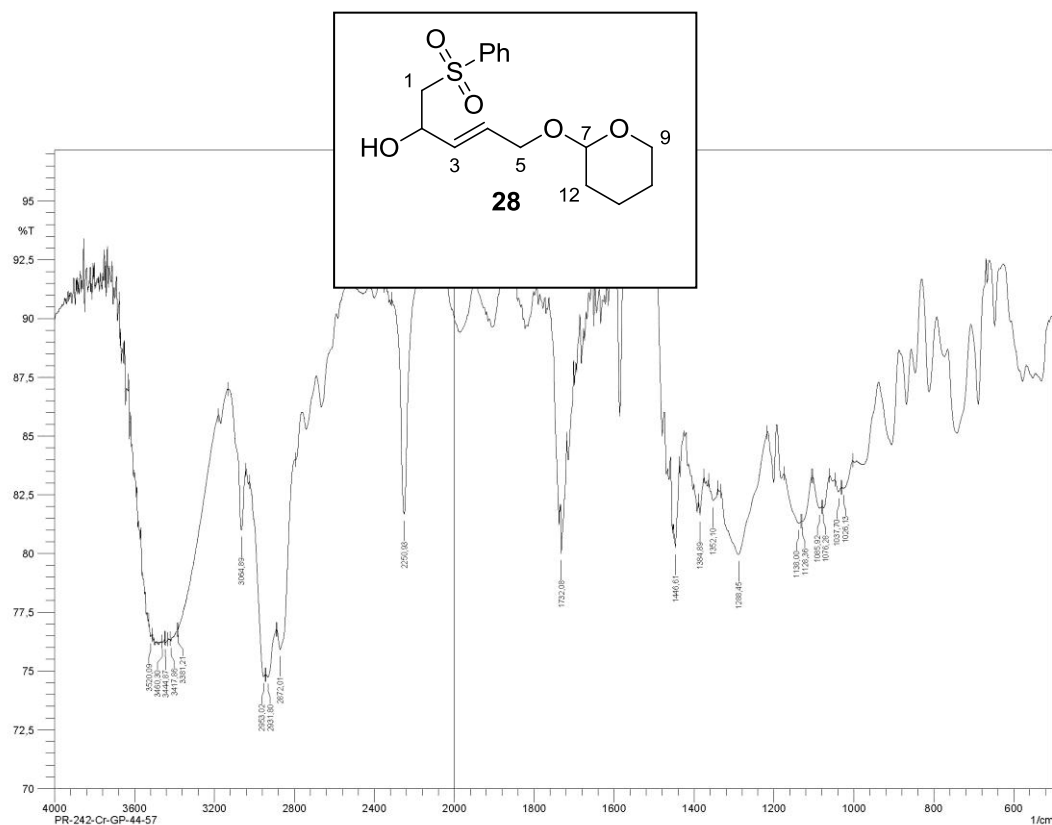

S. G. Espectrometria de Masas

Plaza de los Caídos 1-5

página 1 de 1

Emitido por: César Raposo

37008 Salamanca

10/18/2011

(Responsable SGEM)

Masa exacta

+TOF MS: 0.750 min from Sample 3 (Cr-GP-44-57) of oct181111.wiff

Max: 721.0 counts.

a=3.56675914938910860e-004, t0=-3.50739020320907000e+001 R., subtracted (0.034 to 0...

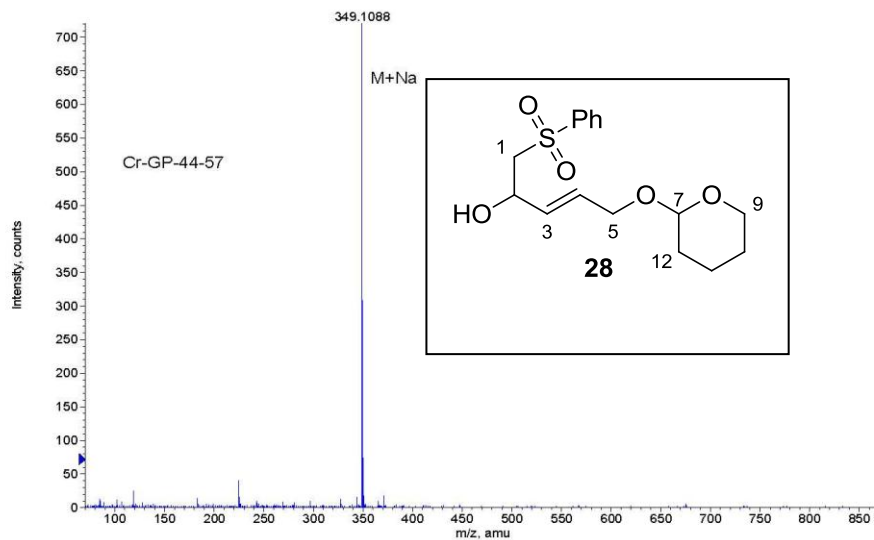

| Formula            | CalculatedMass | mDaError  | ppmError  | RDB  |
|--------------------|----------------|-----------|-----------|------|
| C17 H18 N4 O Na S  | 349.109354     | -0.554312 | -1.587789 | 10.5 |
| C16 H22 O5 Na S    | 349.108017     | 0.783     | 2.24285   | 5.5  |
| C14 H17 N6 O3 S    | 349.107737     | 1.063132  | 3.045269  | 9.5  |
| C18 H21 O5 S       | 349.110422     | -1.62226  | -4.646854 | 8.5  |
| C3 H17 N12 O6 S    | 349.110925     | -2.124836 | -6.086448 | 1.5  |
| C13 H21 N2 O7 S    | 349.1064       | 2.400444  | 6.875909  | 4.5  |
| C19 H17 N4 O S     | 349.11176      | -2.959572 | -8.477493 | 13.5 |
| C12 H18 N6 O3 Na S | 349.105332     | 3.468392  | 9.934973  | 6.5  |



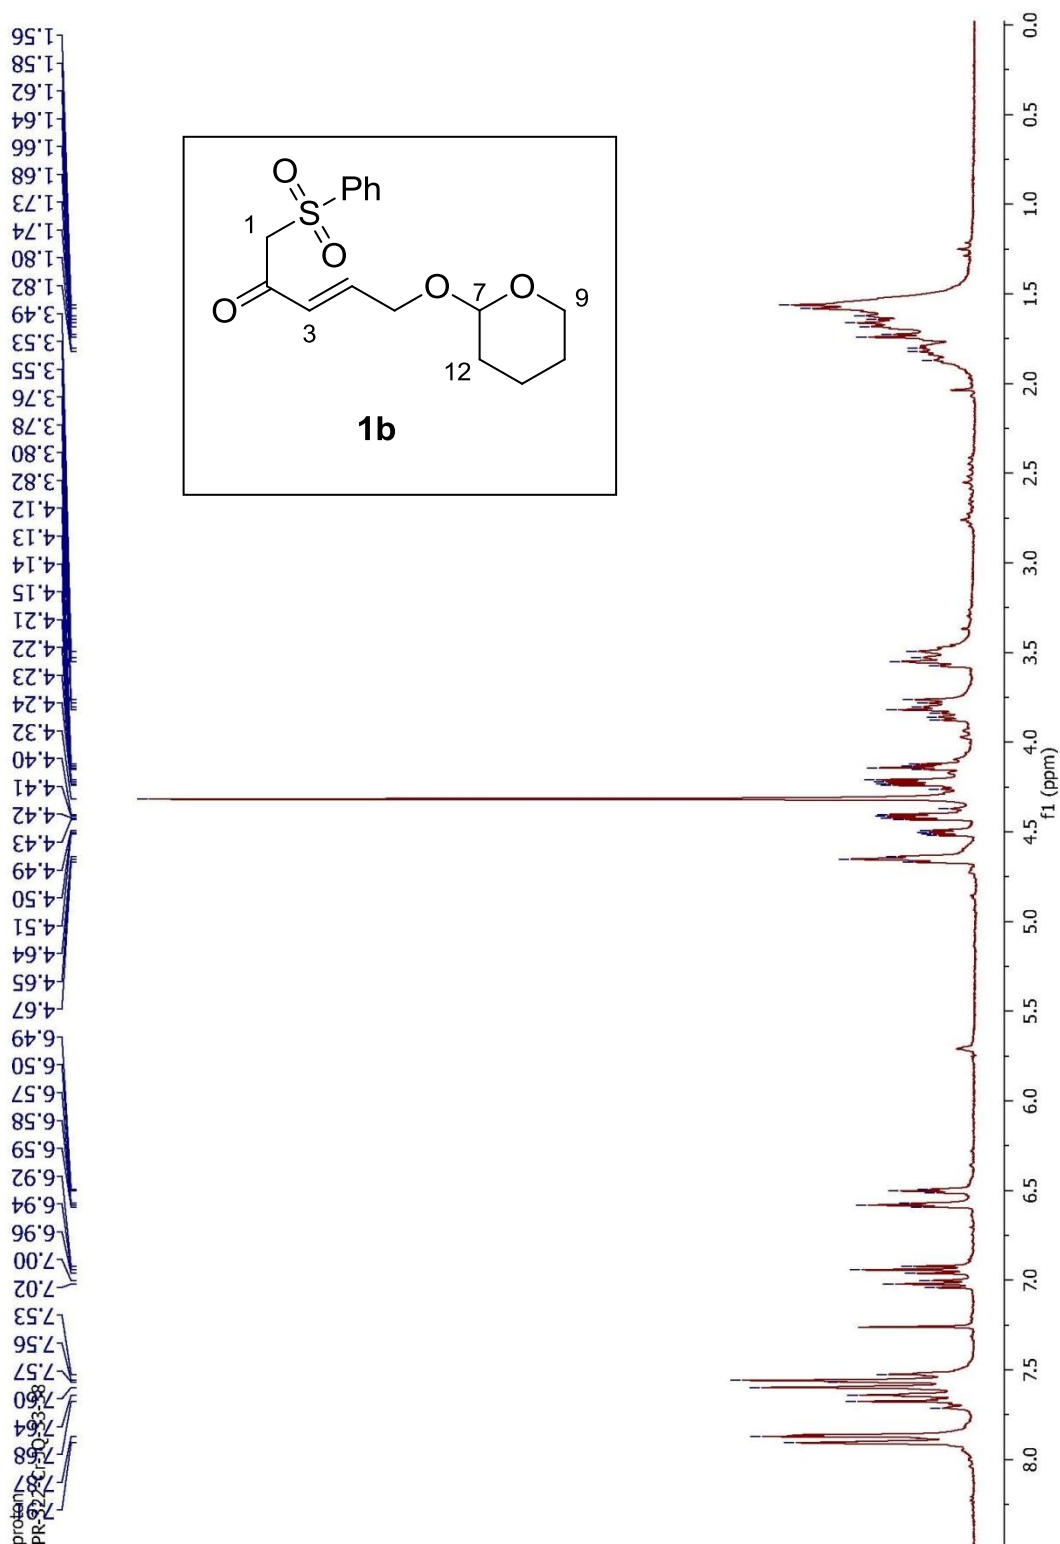

RSC Advances

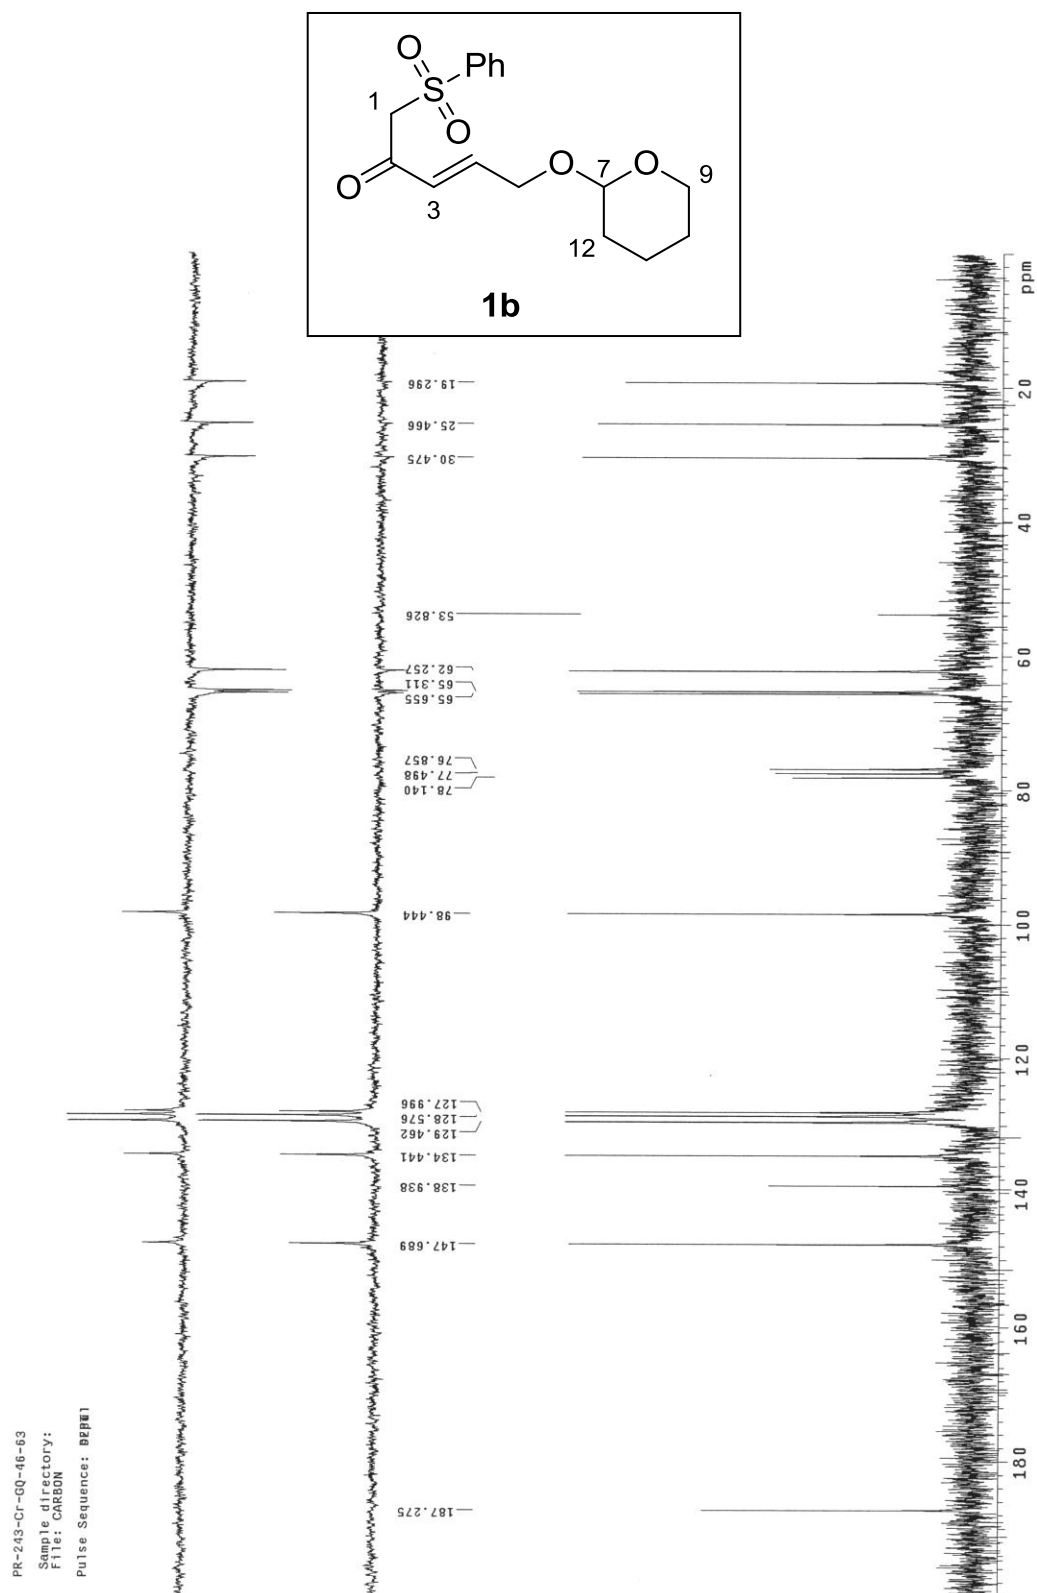

RSC Advances

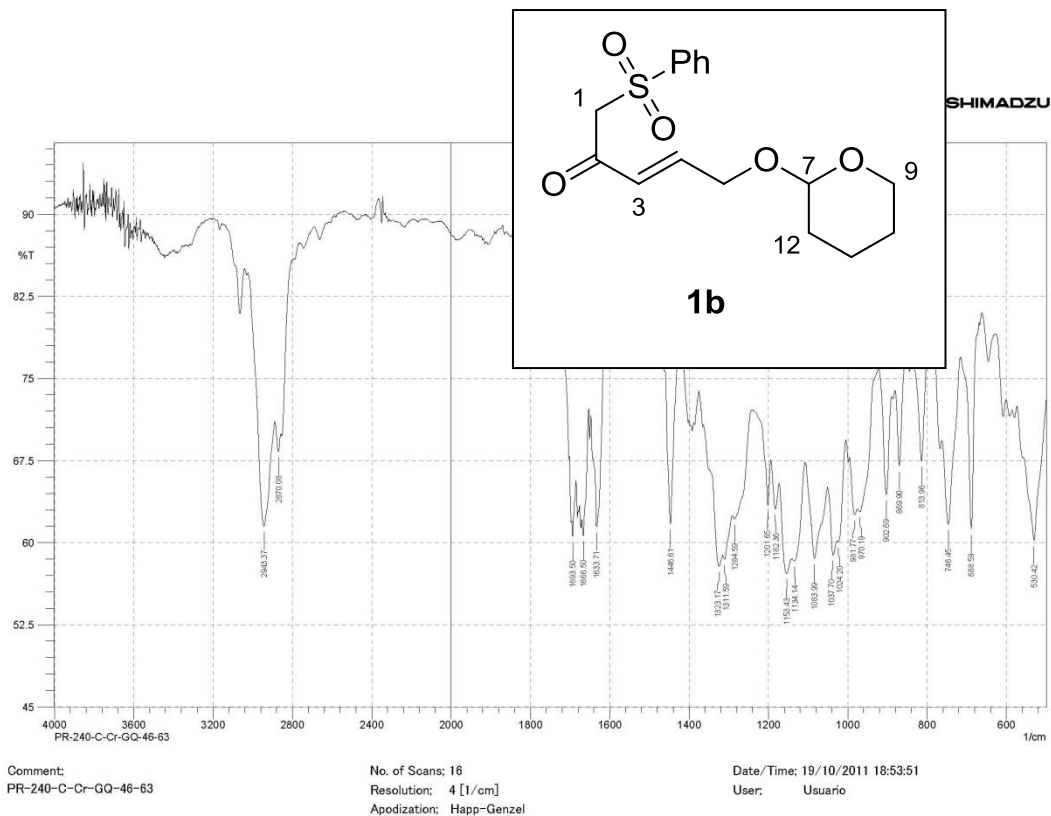

S. G. Espectrometría de Masas  
Emitido por: César Raposo  
(Responsable SGEM)

Plaza de los Caídos 1-5  
37008 Salamanca

página 1 de 1

10/19/2011

Masa exacta

Max. 501.0 counts.

+TOF MS: 0.484 min from Sample 3 (Cr-GQ-46-63) of oct191115.wiff  
a=3.56674090569709410e-004, t0=-3.52006356429701550e+001 R., subtracted (0.034 to 0...

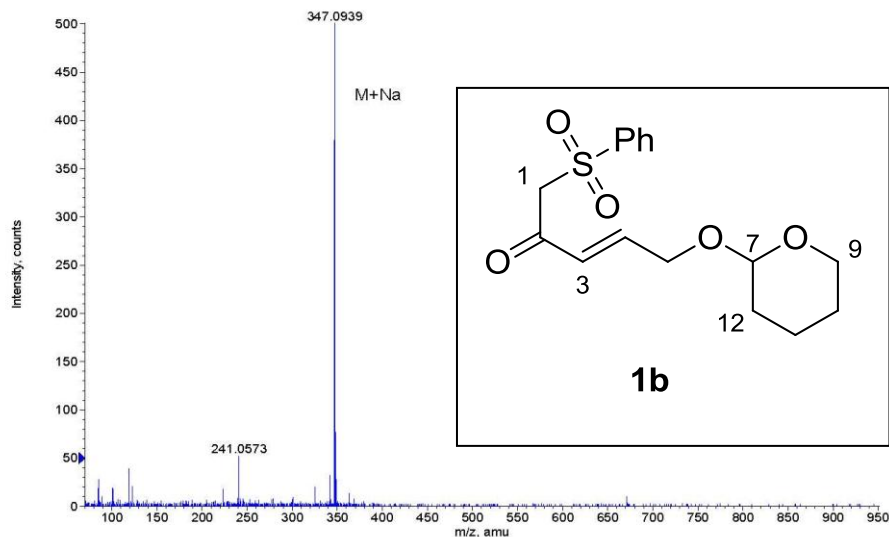

| Formula           | CalculatedMass | mDaError  | ppmError  | RDB  |
|-------------------|----------------|-----------|-----------|------|
| C17 H16 N4 O Na S | 347.093704     | 0.195768  | 0.564019  | 11.5 |
| C9 H12 N10 O4 Na  | 347.09352      | 0.37976   | 1.094111  | 8.5  |
| C9 H19 N2 O12     | 347.093251     | 0.649124  | 1.870165  | 1.5  |
| C10 H15 N6 O8     | 347.094588     | -0.688188 | -1.982711 | 6.5  |
| C18 H19 O5 S      | 347.094772     | -0.87218  | -2.512803 | 9.5  |
| C10 H8 N14 Na     | 347.094858     | -0.957552 | -2.758765 | 13.5 |
| C12 H20 O10 Na    | 347.094868     | -0.96832  | -2.789788 | 2.5  |
| C H16 N12 O6 Na S | 347.092869     | 1.030504  | 2.968944  | -0.5 |
| C22 H11 N4 O      | 347.092738     | 1.162468  | 3.34914   | 19.5 |
| C3 H15 N12 O6 S   | 347.095275     | -1.374756 | -3.960755 | 2.5  |
| C16 H20 O5 Na S   | 347.092367     | 1.53308   | 4.416896  | 6.5  |

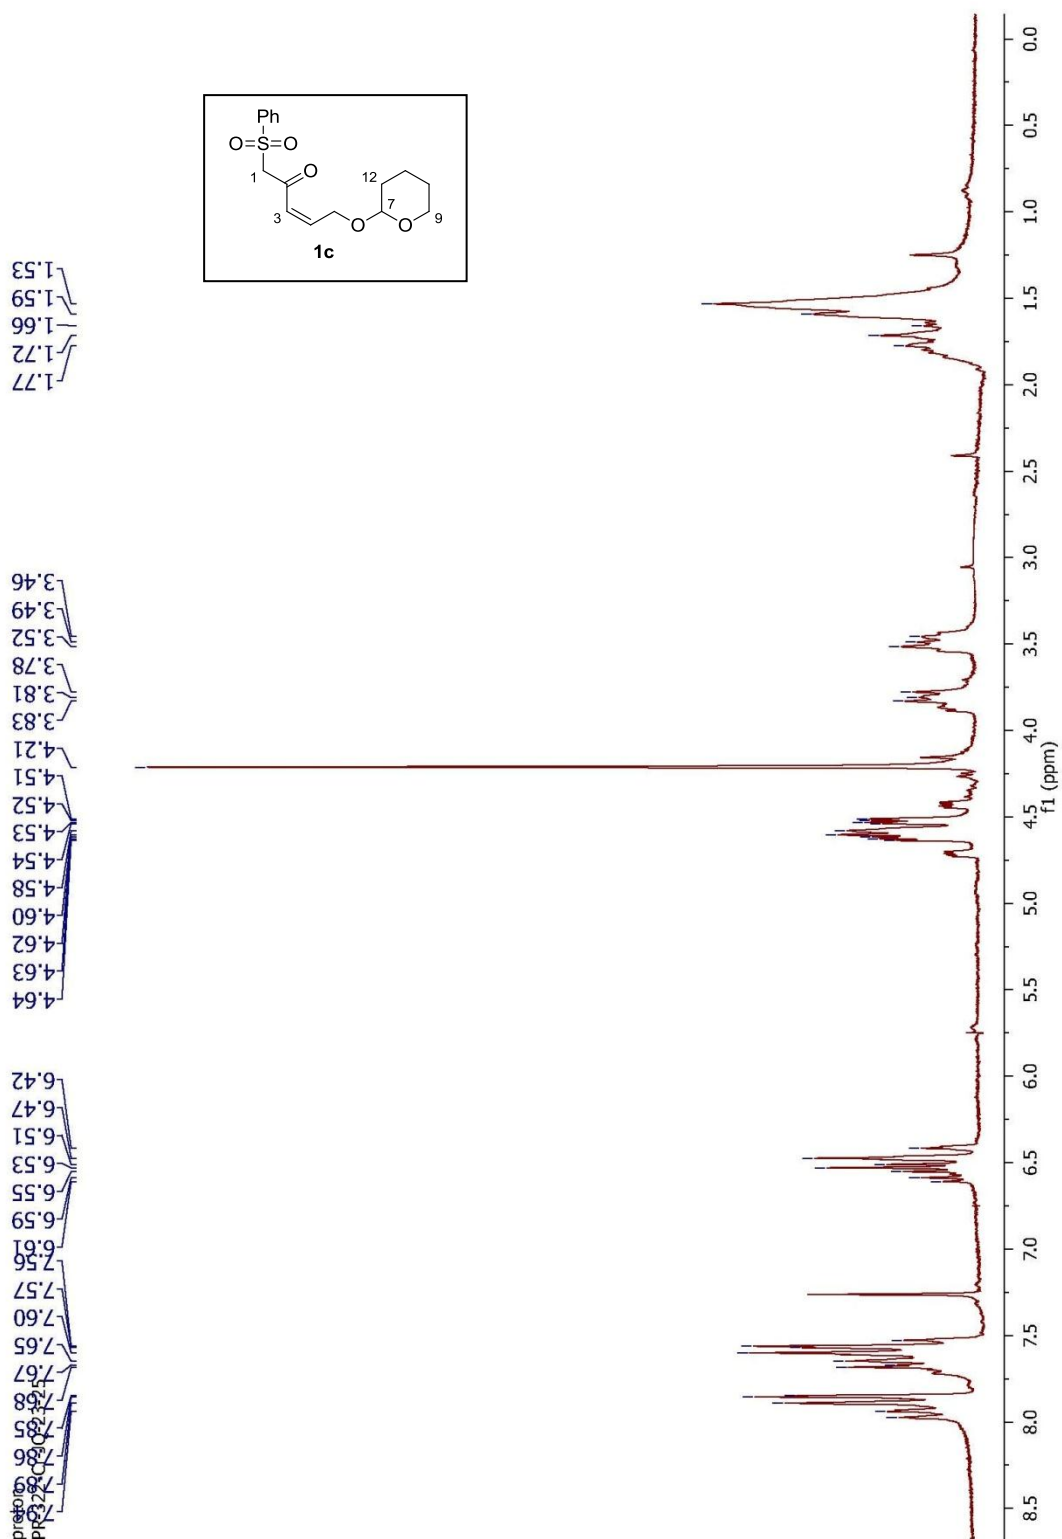

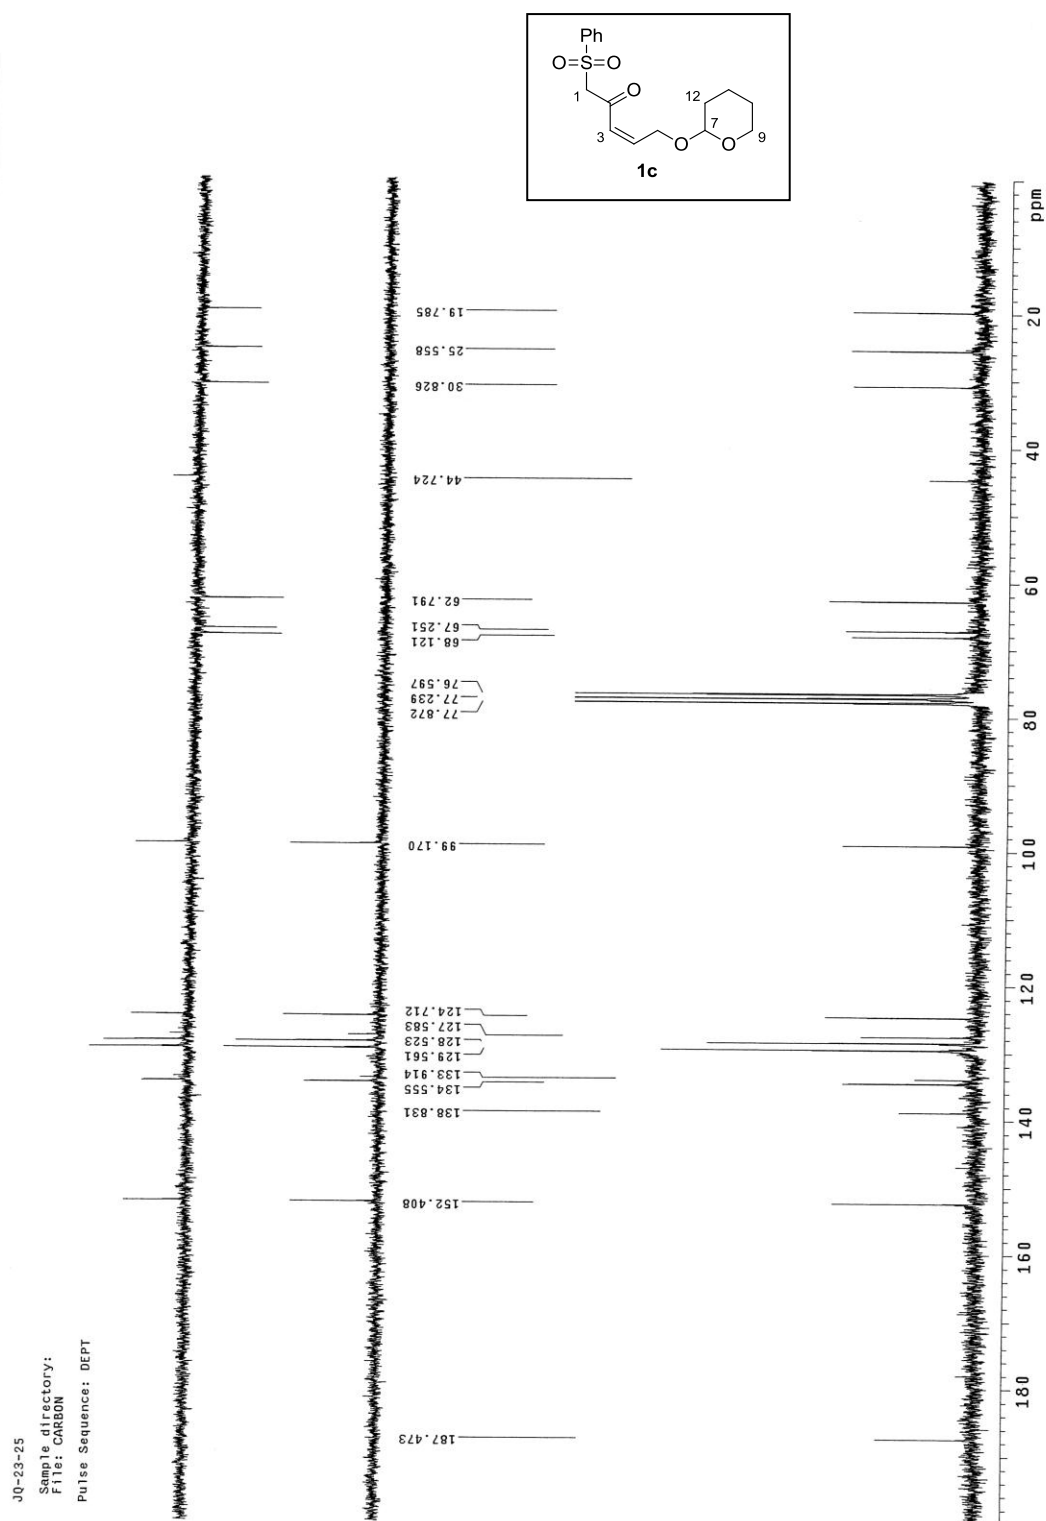

RSC Advances

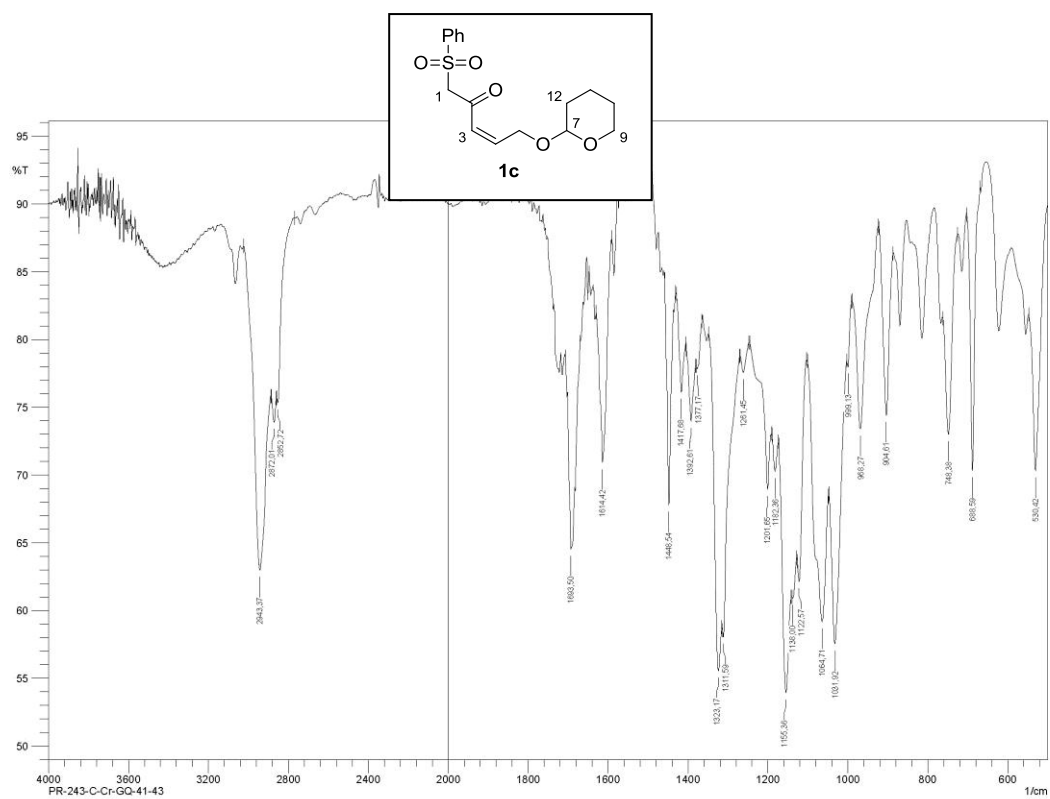

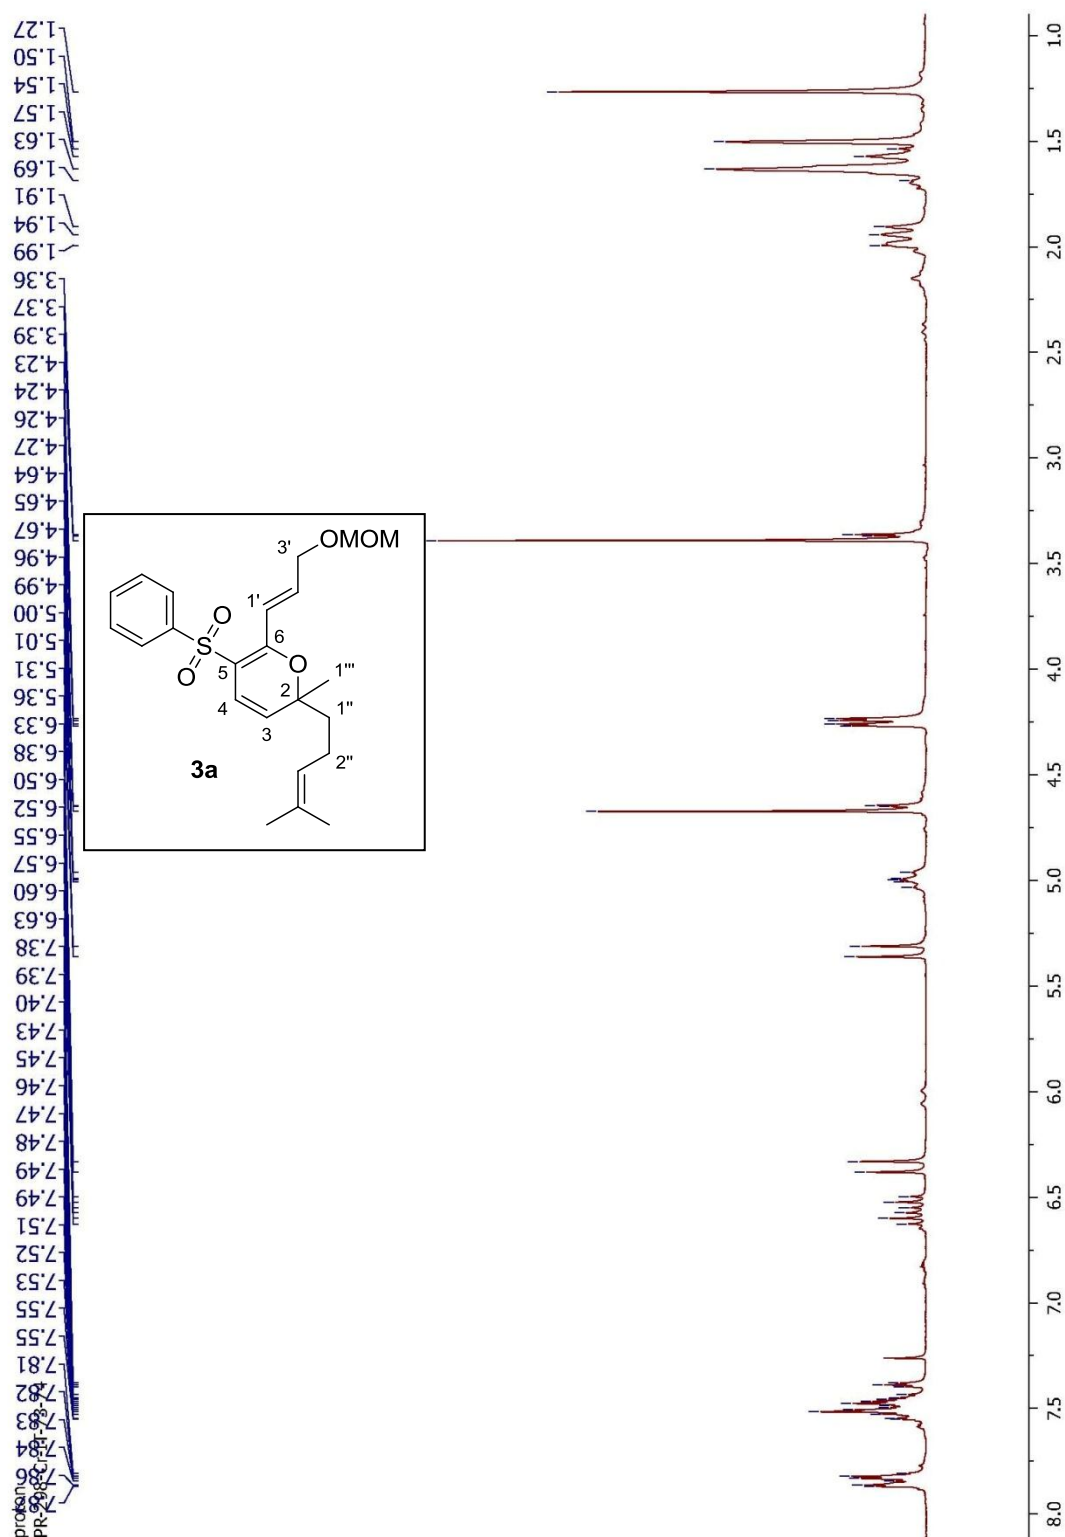

11rmn-0257 Jav1 G1 71-75  
13C CDC13 Tubo Shigem1

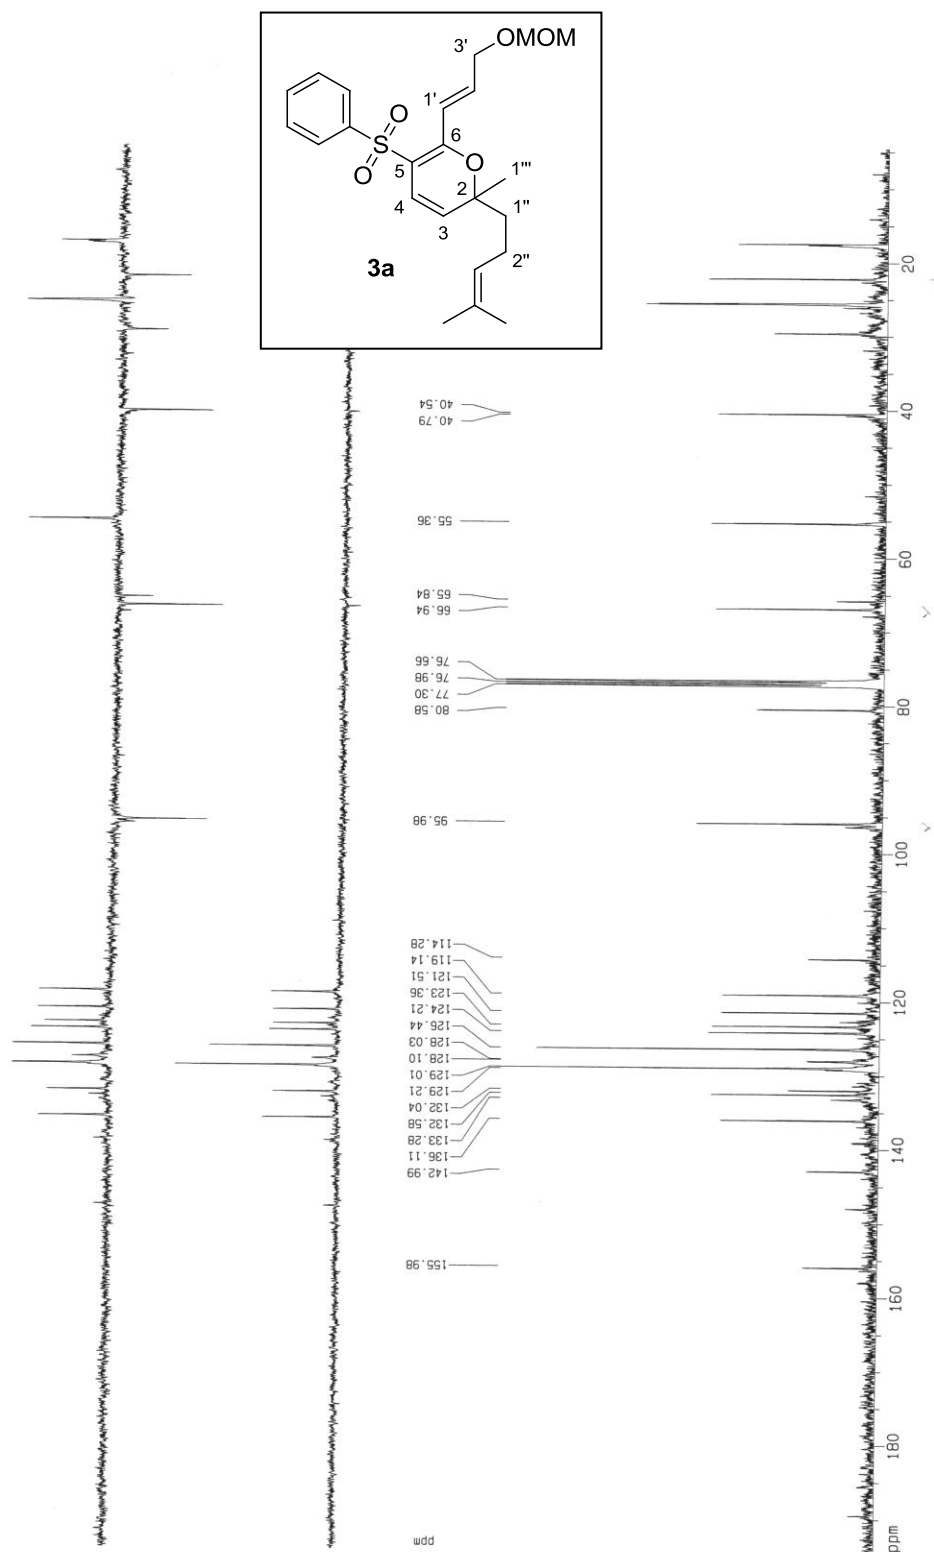



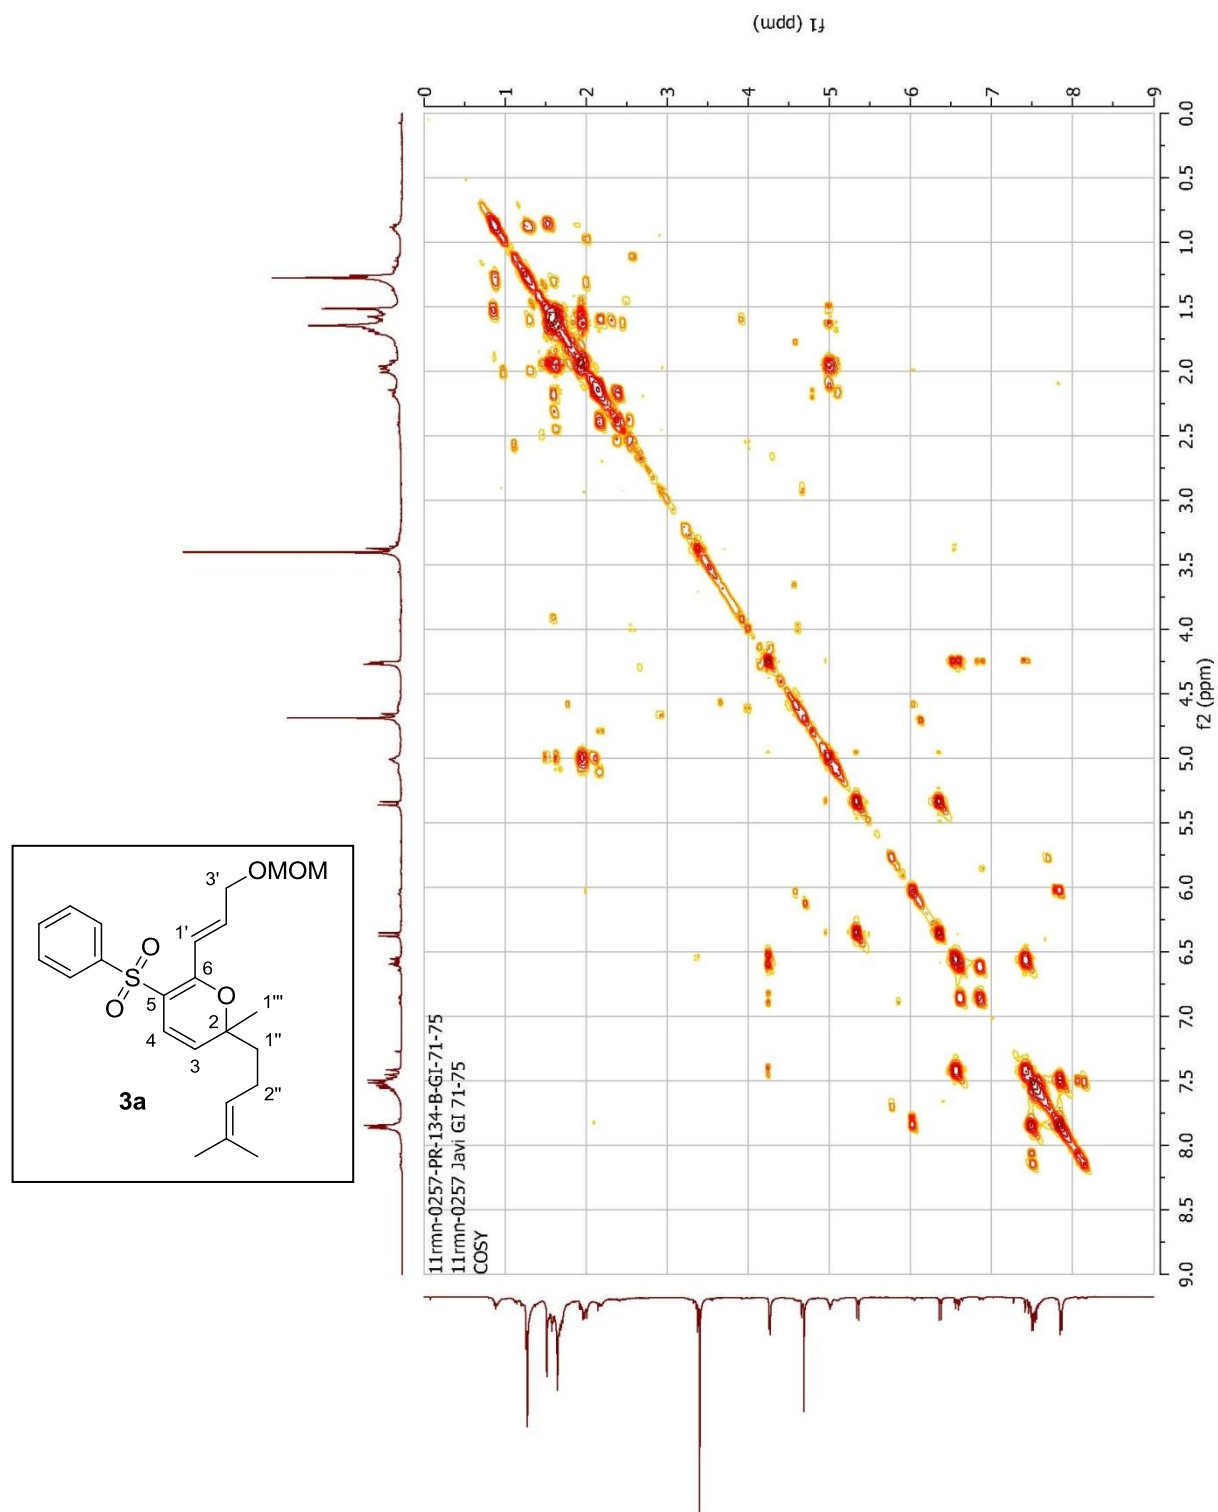

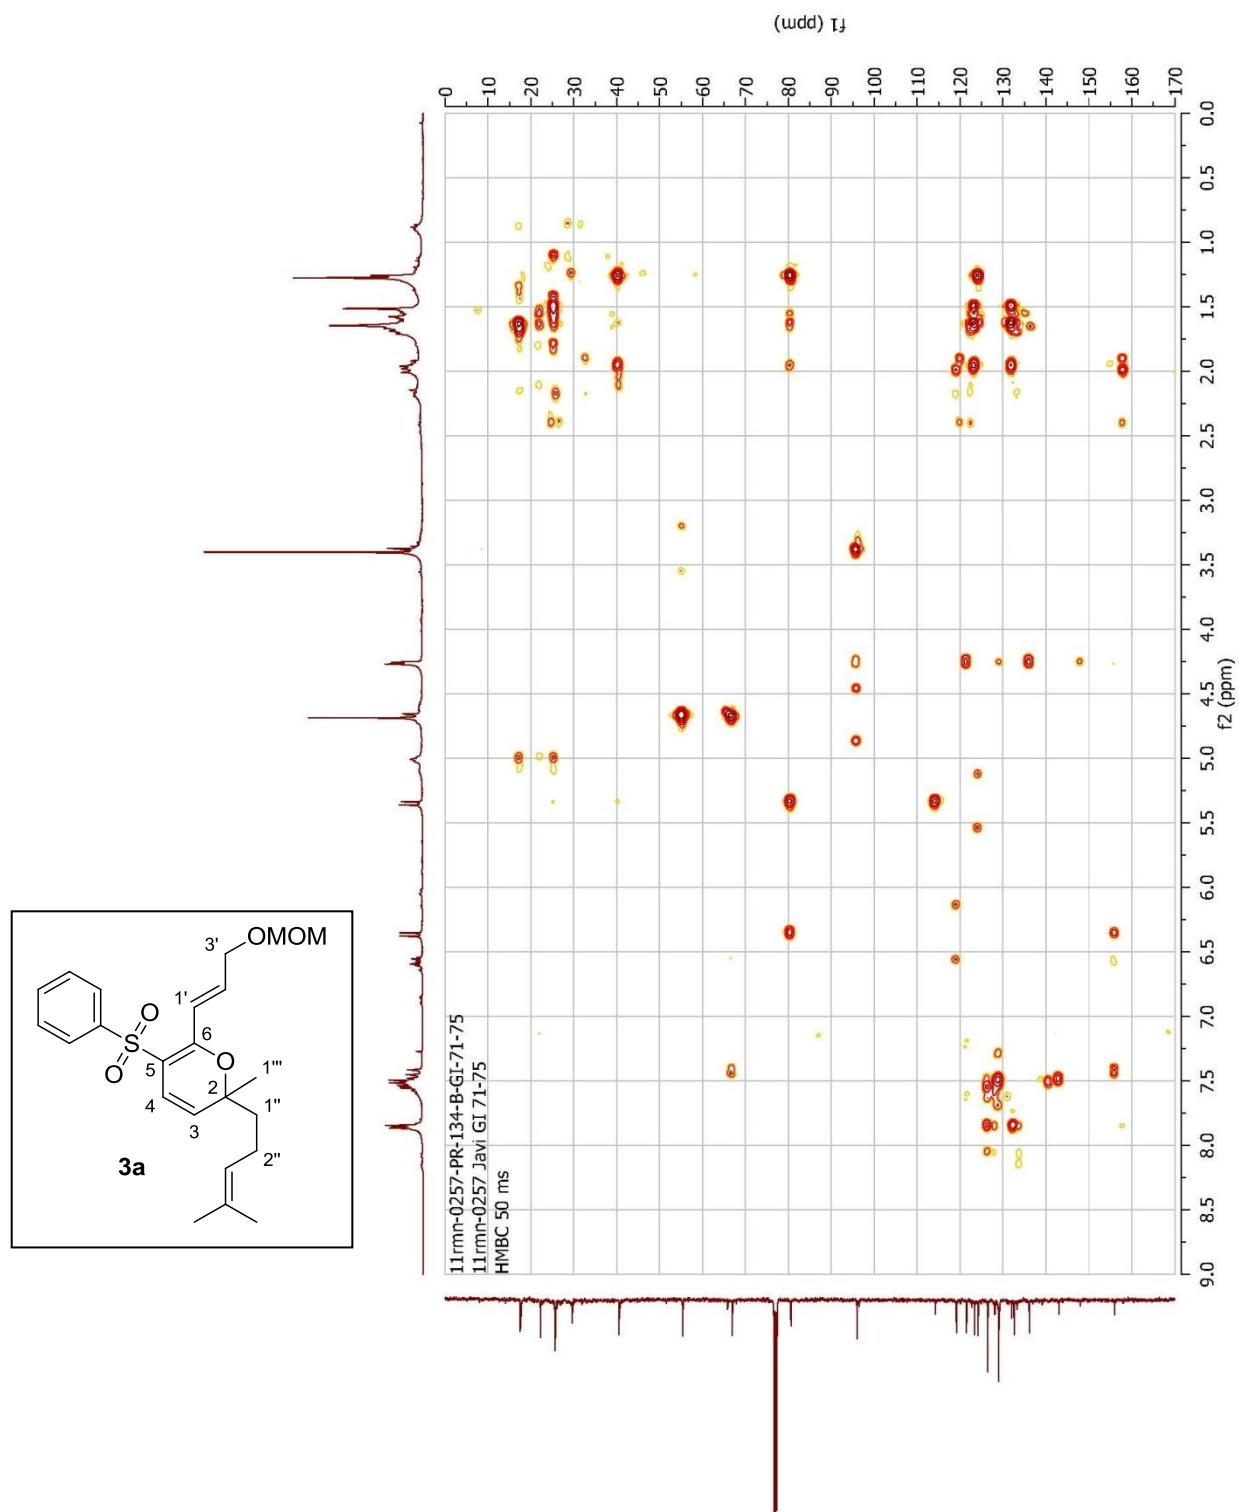

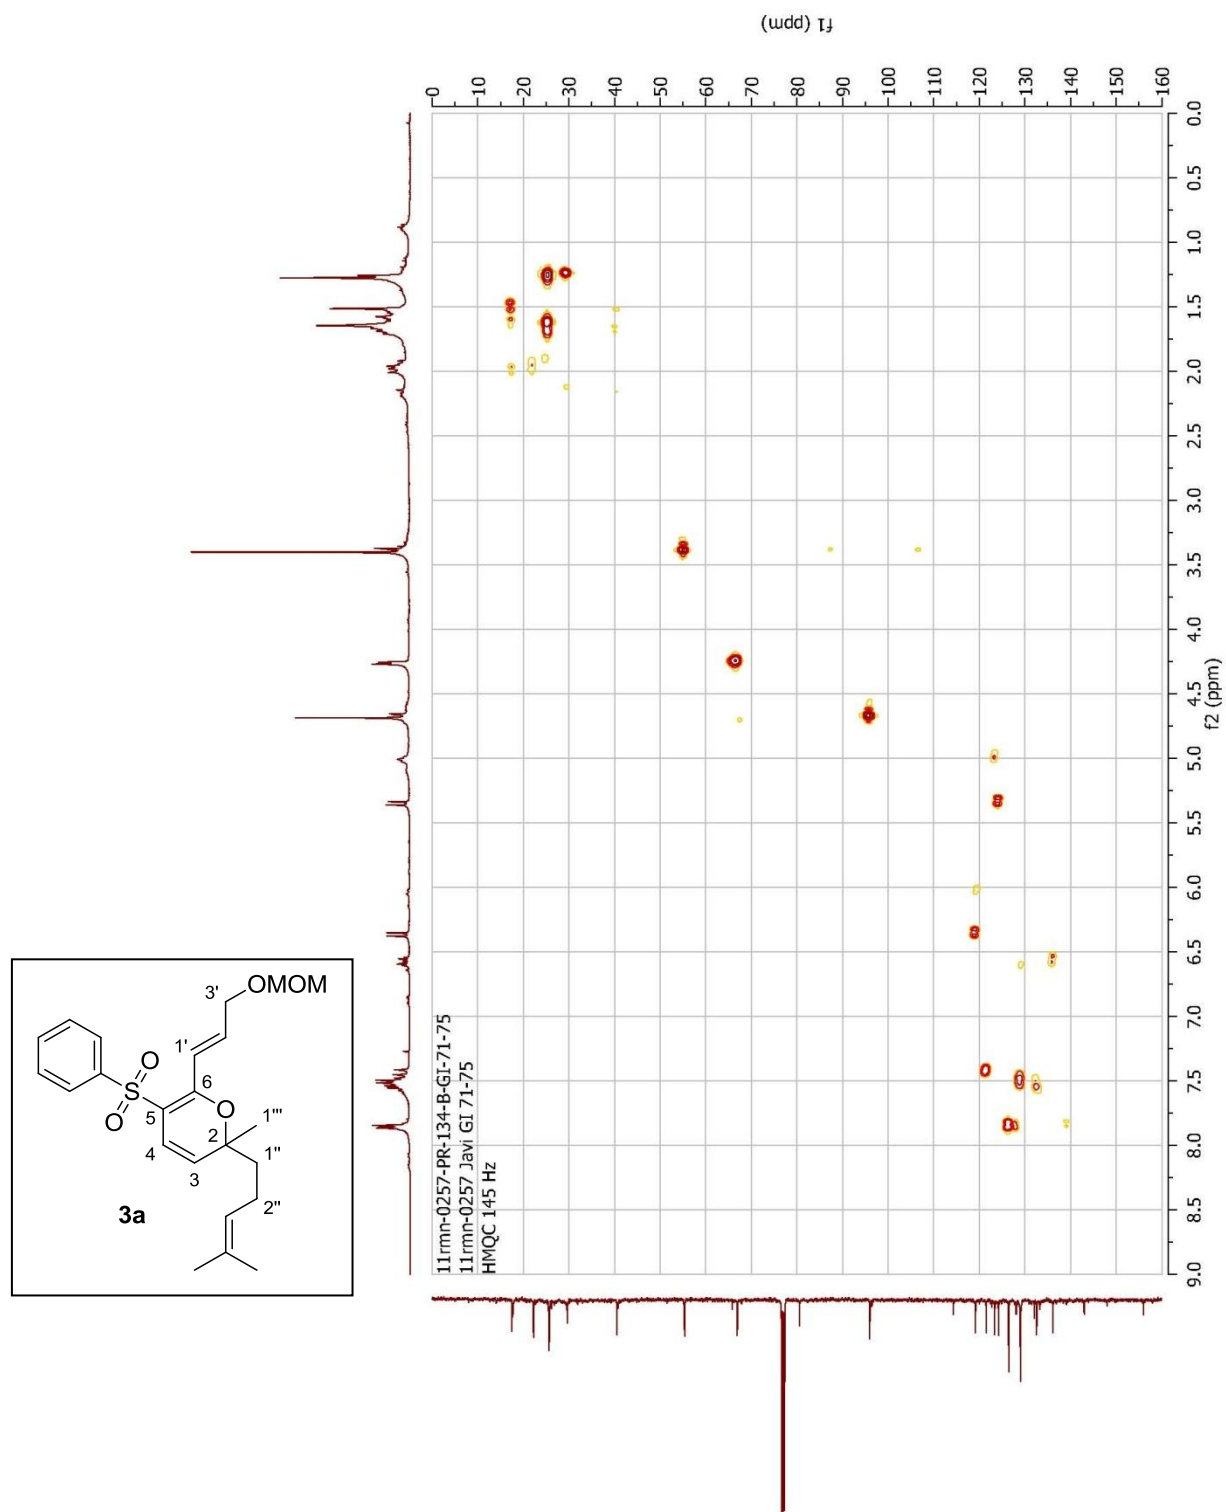

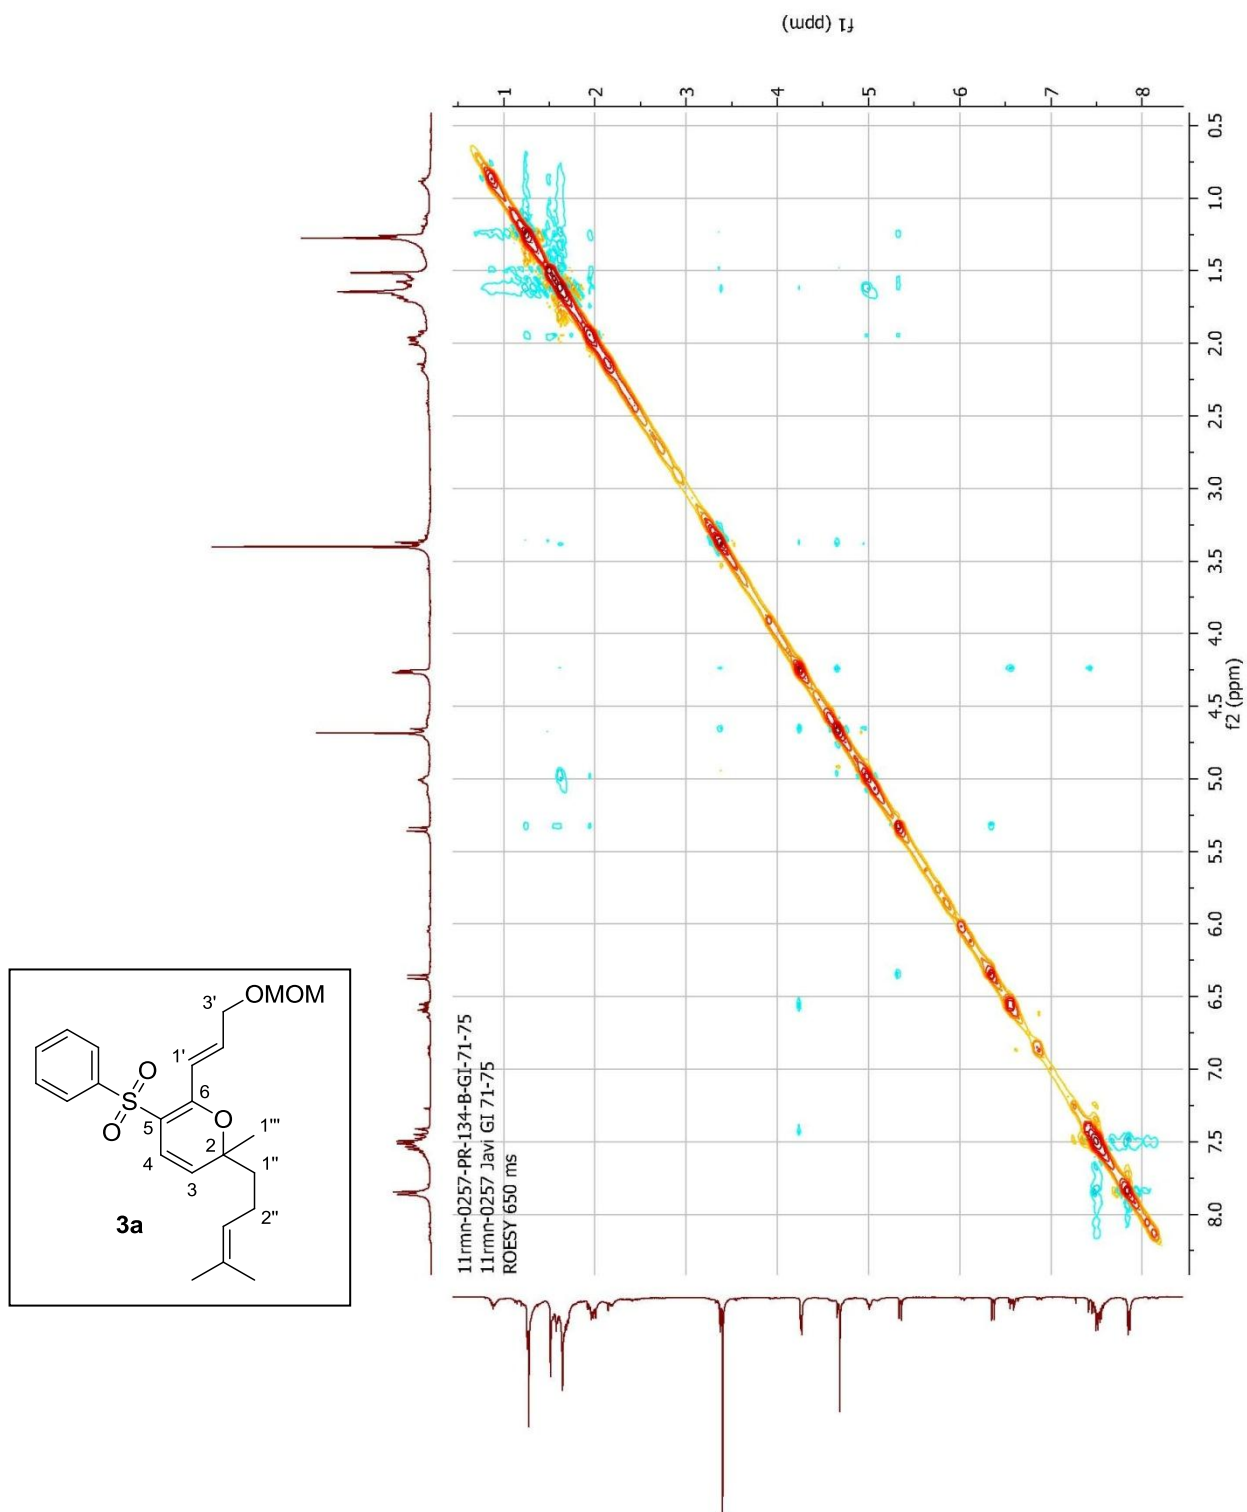

RSC Advances

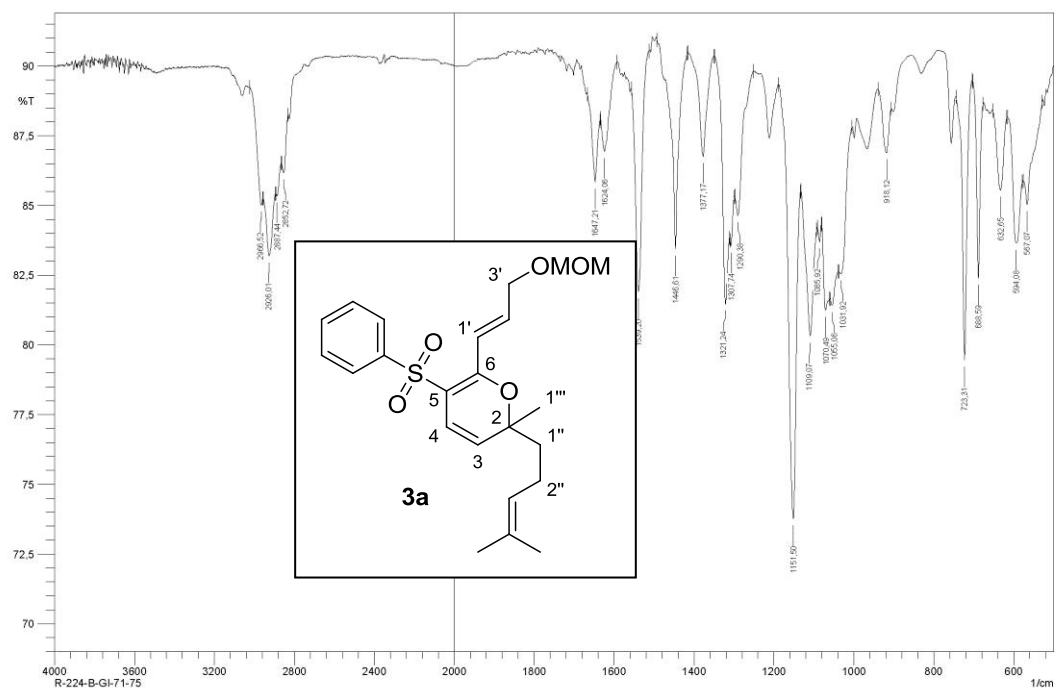

S. G. Espectrometría de Masas

Plaza de los Caídos 1-5

página 1 de 1

Emitido por: César Raposo

37008 Salamanca

10/11/2011

(Responsable SGEM)

Masa exacta

+TOF MS: 0.284 min from Sample 5 (Cr-GI-71-75) of oct1011114.wiff  
a=3.56671390090838620e-004, t0=3.50372002432777660e+001 R., subtracted (0.034 to 0...

Max. 587.0 counts.

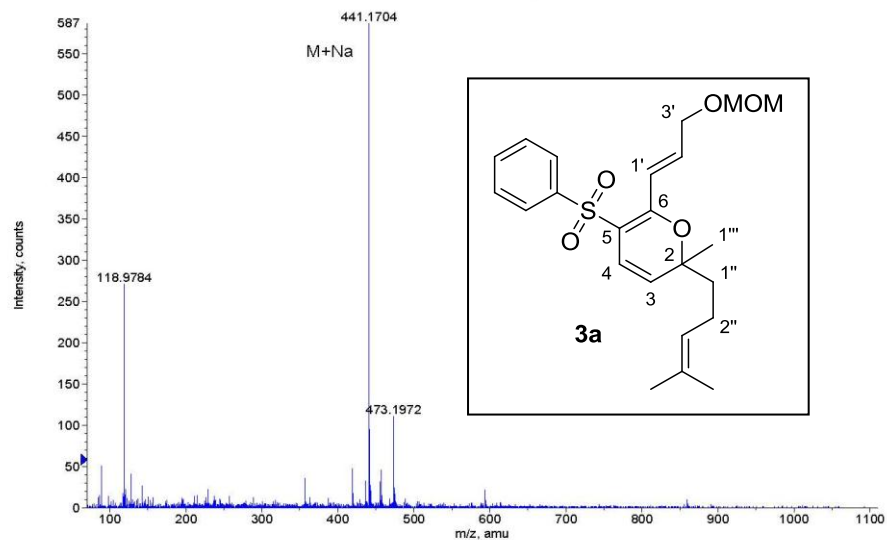

| Formula         | CalculatedMass | mDaError | ppmError  | RDB  |
|-----------------|----------------|----------|-----------|------|
| C21 H25 N6 O3 S | 441.170337     | 0.062812 | 0.142376  | 12.5 |
| C23 H30 O5 Na S | 441.170617     | -0.21732 | -0.492598 | 8.5  |

<Chromatogram>

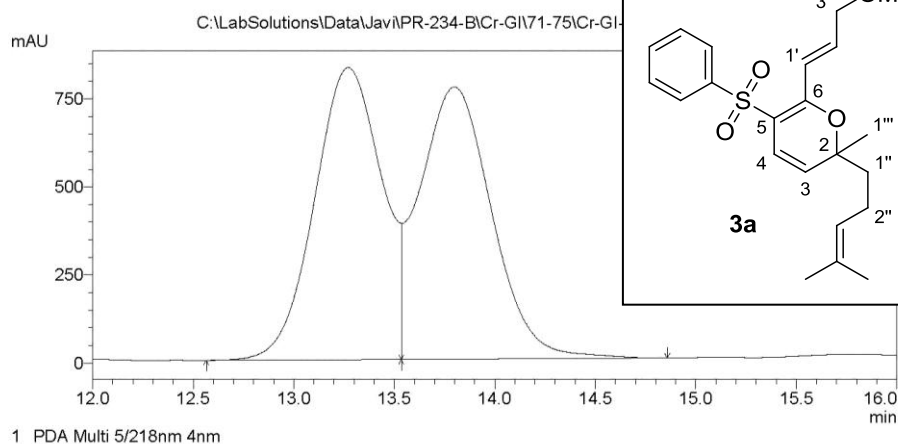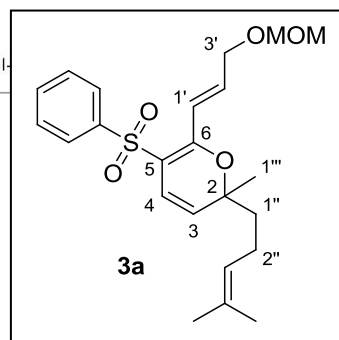

PeakTable

| PDA Ch5 218nm 4nm |           |         |
|-------------------|-----------|---------|
| Peak#             | Ret. Time | Area %  |
| 1                 | 13.265    | 50.162  |
| 2                 | 13.794    | 49.838  |
| Total             |           | 100.000 |

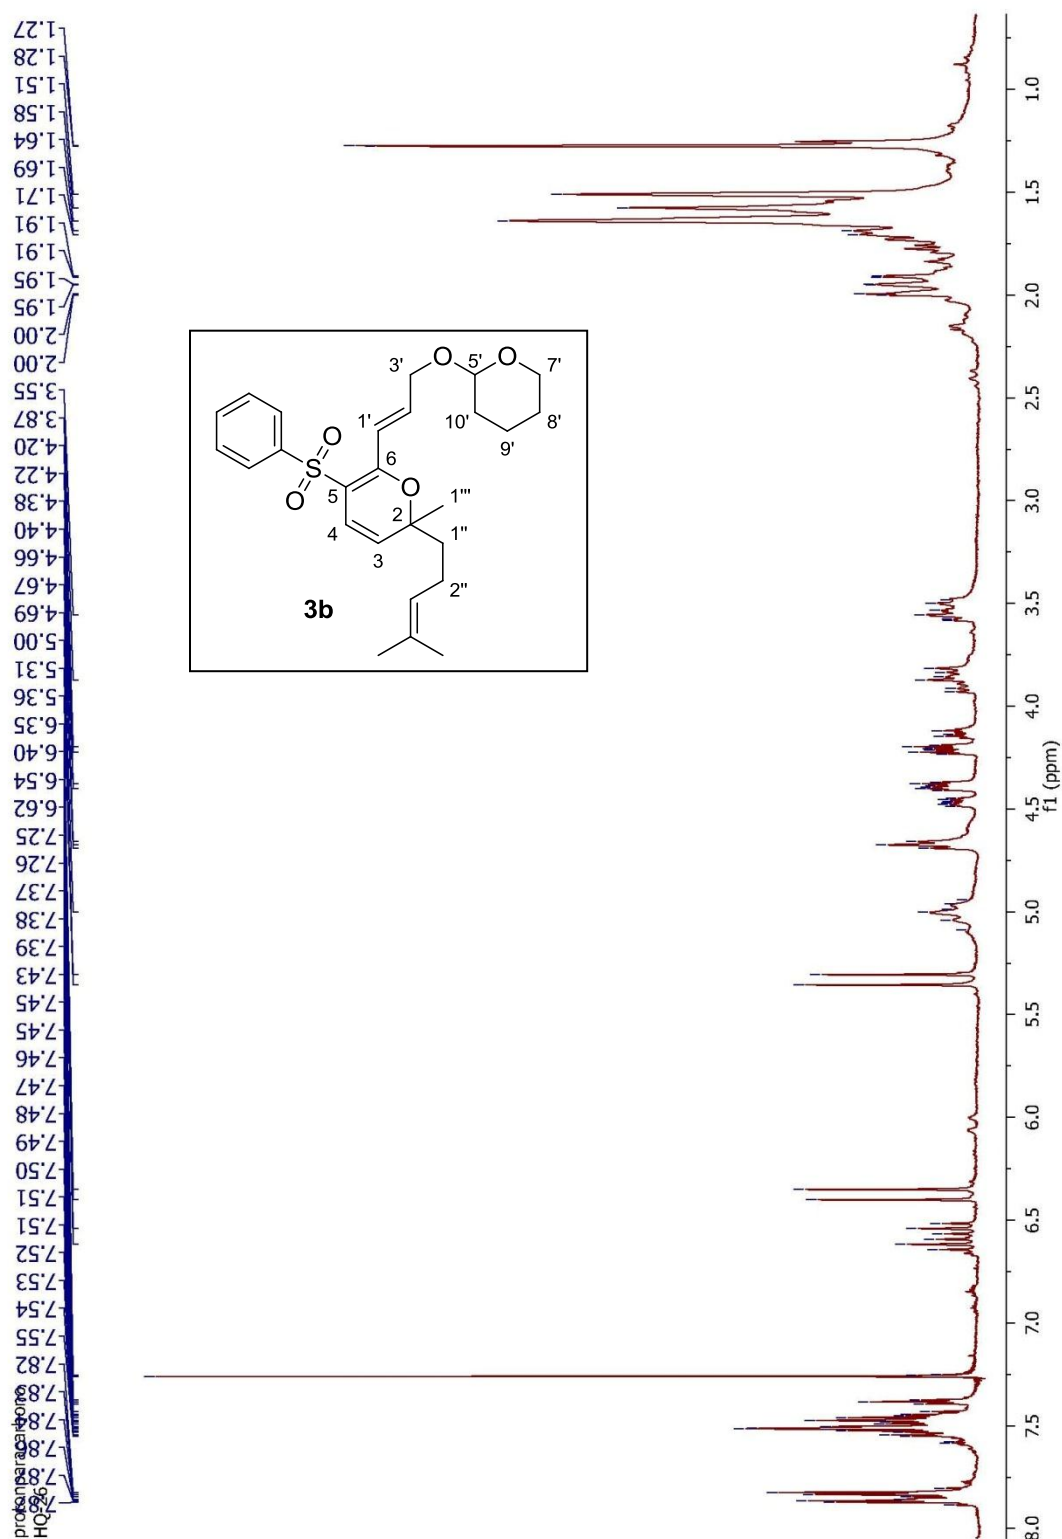

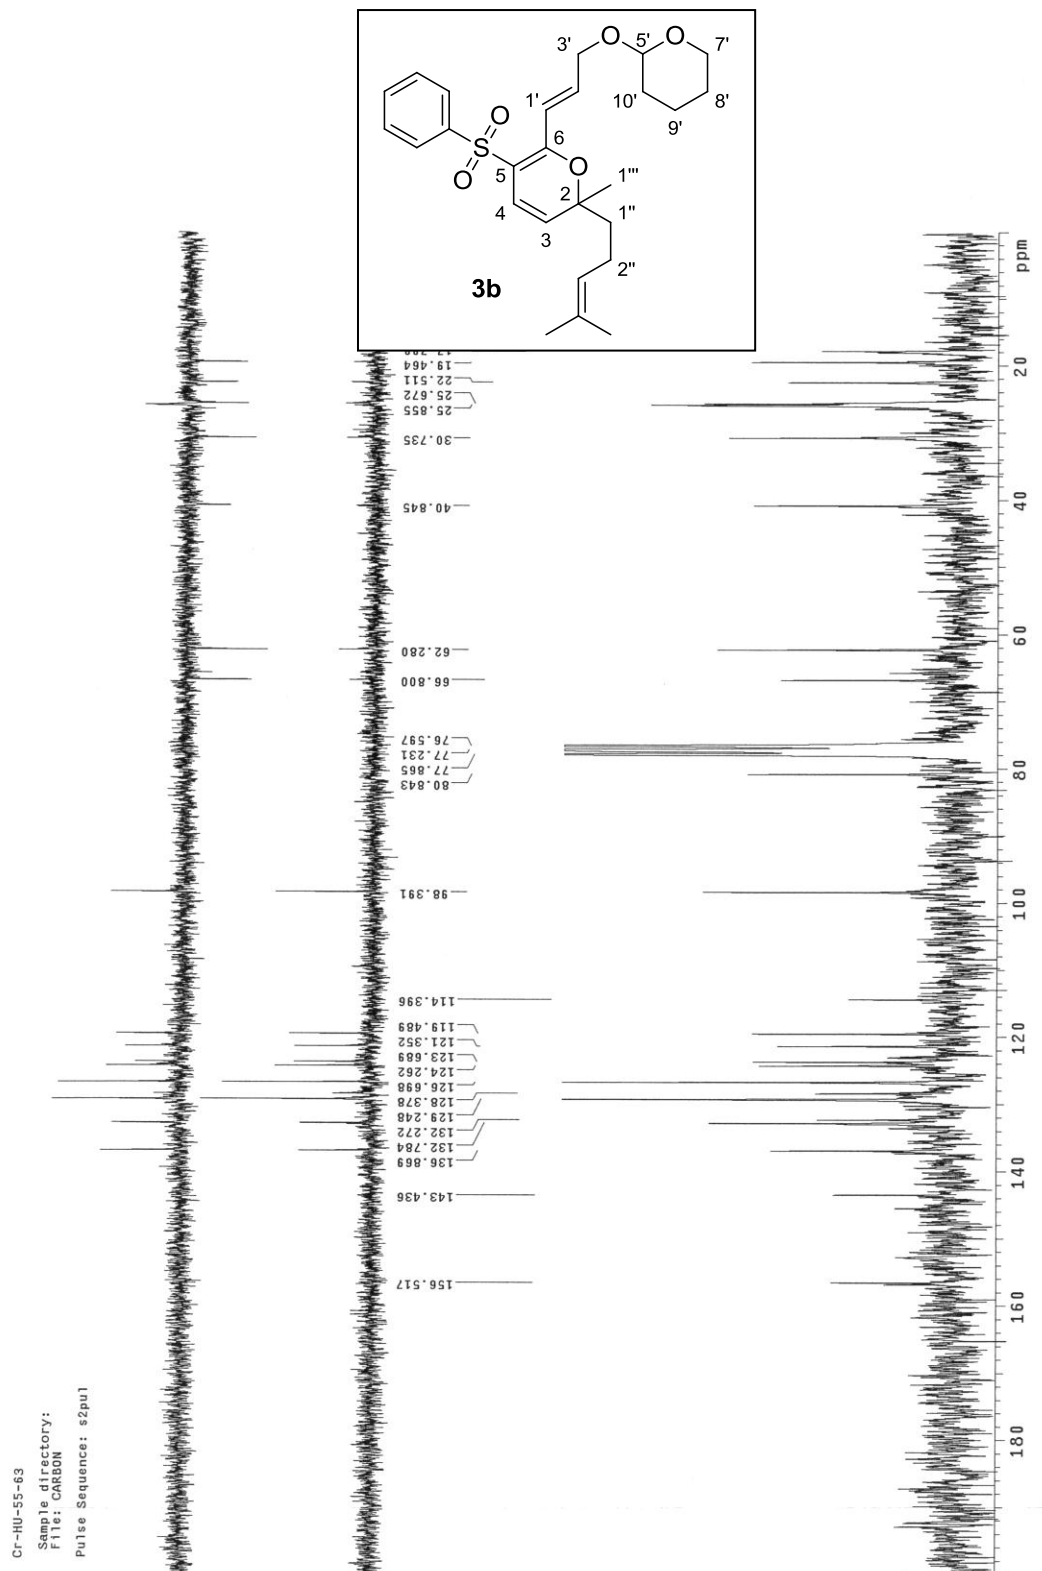



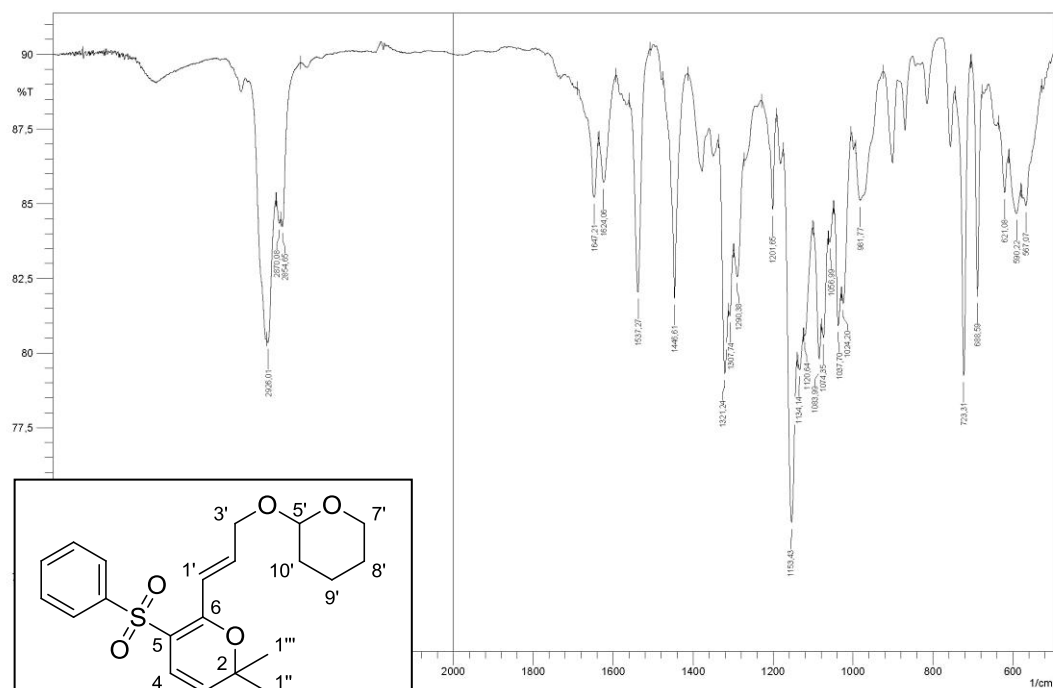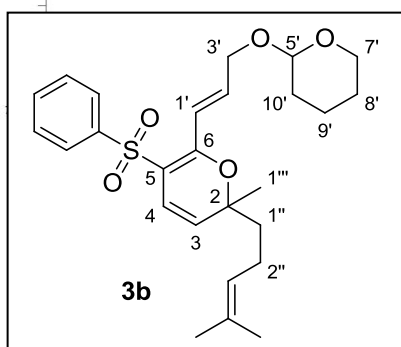

Plaza de los Caídos 1-5  
37008 Salamanca

página 1 de 1

12/15/2011

Masa exacta

Max. 687.0 counts.

Emitido por: César Raposo

(Responsable SGEM)

+TOF MS: 0.217 min from Sample 4 (Cr-HU-55-63) of dic151111.wiff  
a=3.56654898355231220e-004, t0=-3.49436559345303980e+001 R.; subtracted (0.034 to 0...

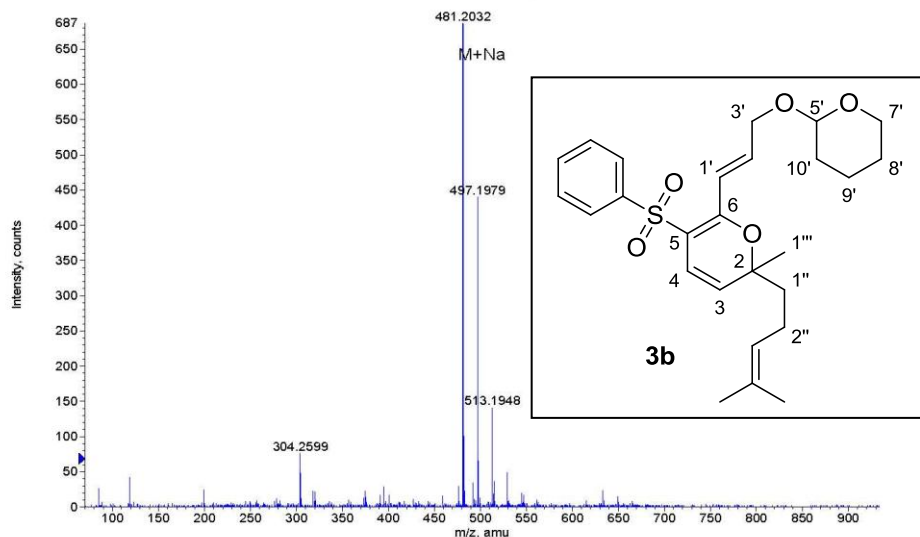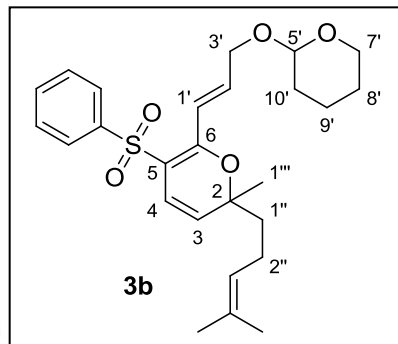

| Formula             | CalculatedMass | mDaError  | ppmError  | RDB  |
|---------------------|----------------|-----------|-----------|------|
| C27 H30 N4 O Na S   | 481.203255     | -0.054792 | -0.113864 | 14.5 |
| C12 H33 N8 O10 S    | 481.203488     | -0.288004 | -0.598507 | 0.5  |
| C11 H30 N12 O6 Na S | 481.20242      | 0.779944  | 1.620819  | 2.5  |
| C28 H33 O5 S        | 481.204323     | -1.12274  | -2.33319  | 12.5 |
| C26 H34 O5 Na S     | 481.201917     | 1.28252   | 2.665233  | 9.5  |

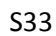

RSC Advances

K0-54-75  
Sample directory:  
File: CARBON  
Pulse Sequence: DEPT

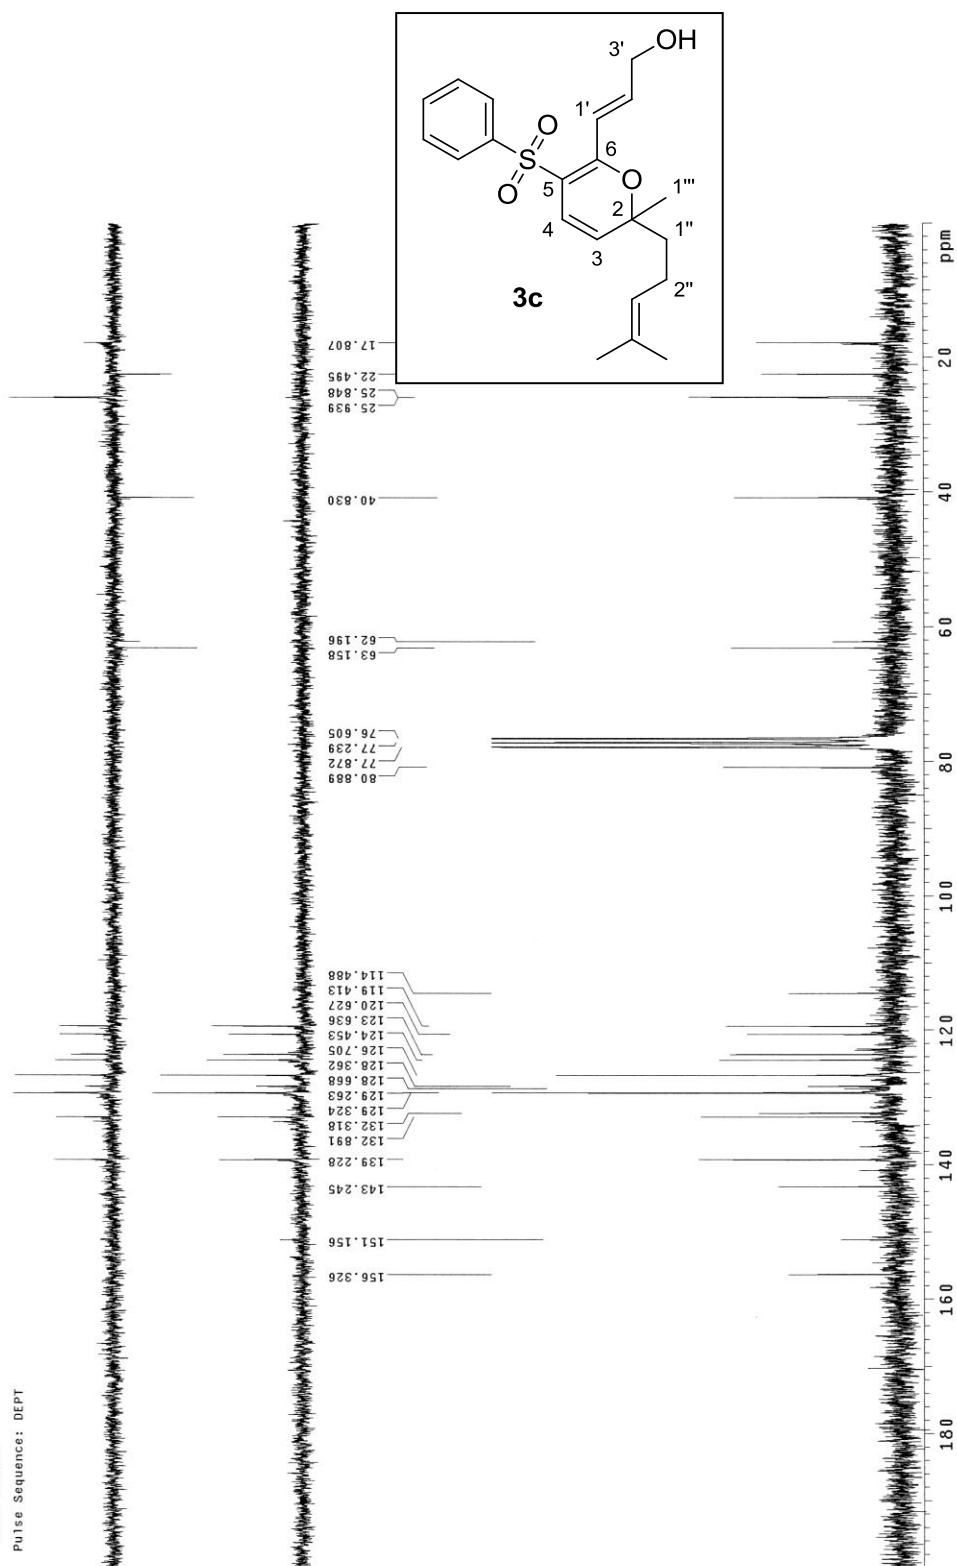

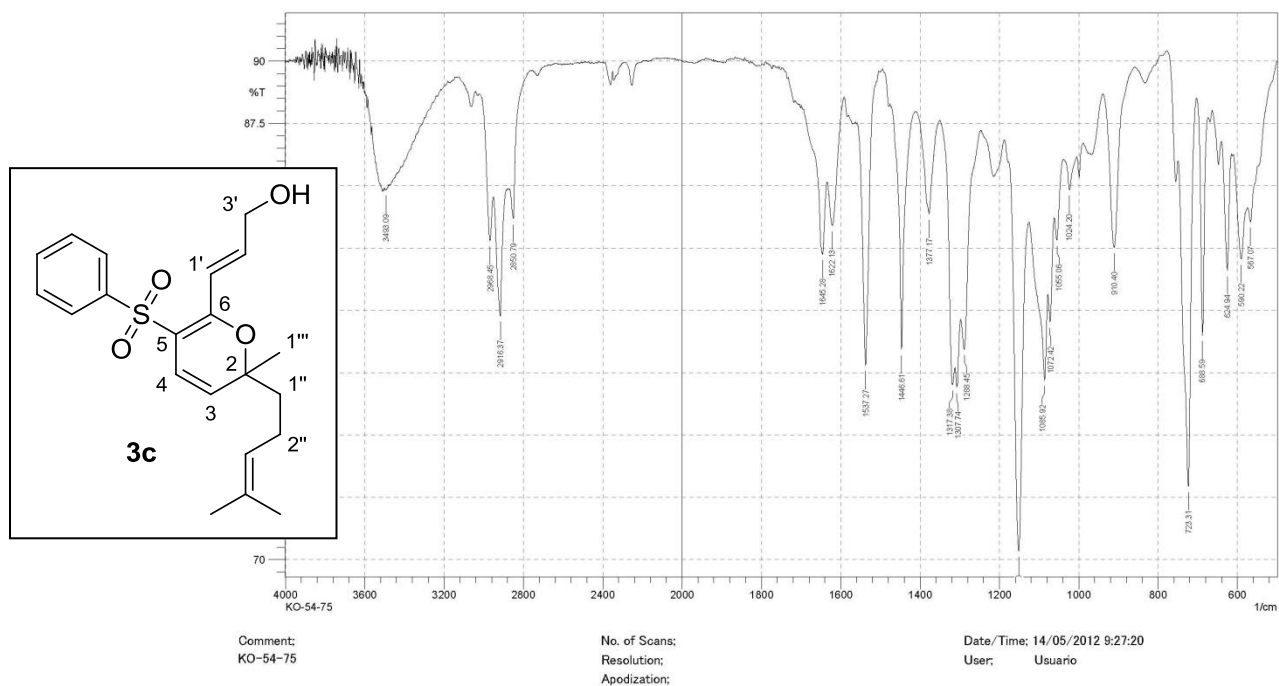

S. G. Espectrometria de Masas  
Emitido por: César Raposo  
(Responsable SGEM)

+TOF MS: 0.284 min from Sample 2 (KO-54-75) of may141211.v  
a=3.56679946278365990e-004, t0=3.56830836767112490e+00

Plaza  
37

página 1 de 1  
5/14/2012  
Masa exacta  
Max. 842.0 counts.

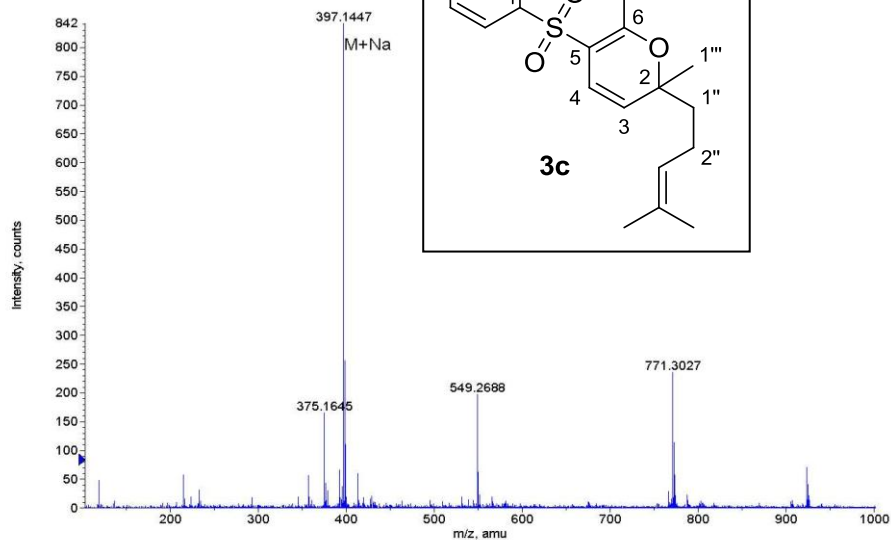

| Formula         | CalculatedMass | mDaError  | ppmError  | RDB  |
|-----------------|----------------|-----------|-----------|------|
| C27 H17 N4      | 397.144773     | -0.073132 | -0.184144 | 21.5 |
| C21 H26 O4 Na S | 397.144403     | 0.29748   | 0.749046  | 8.5  |

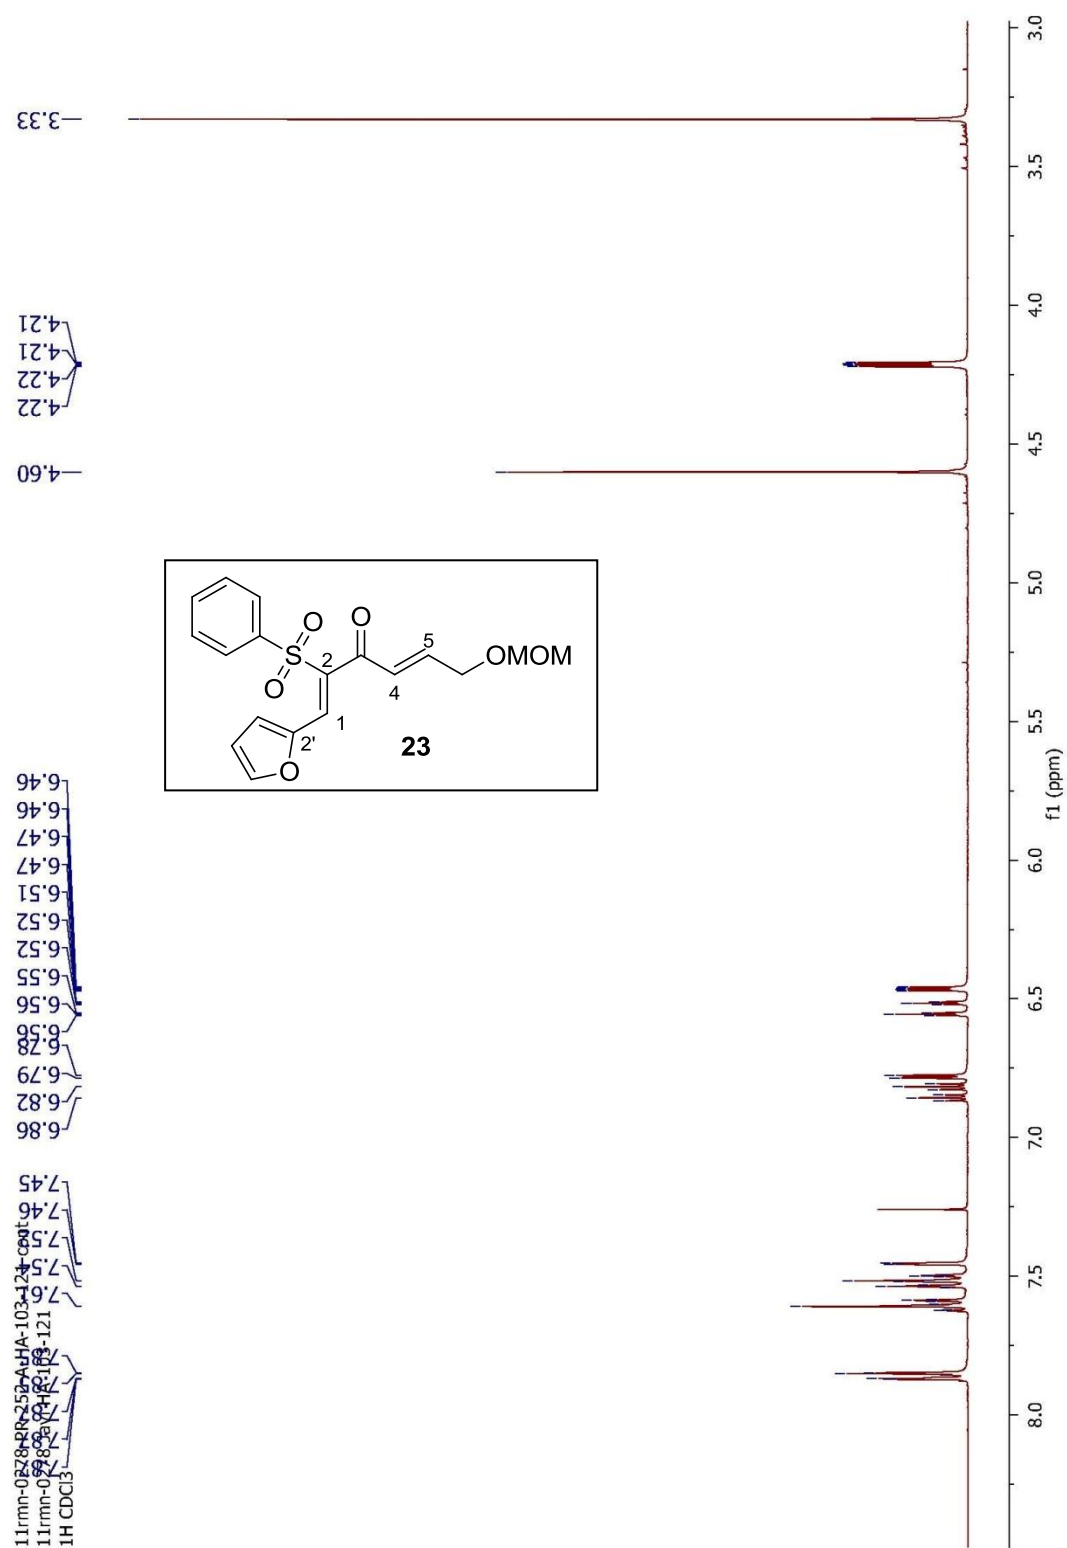

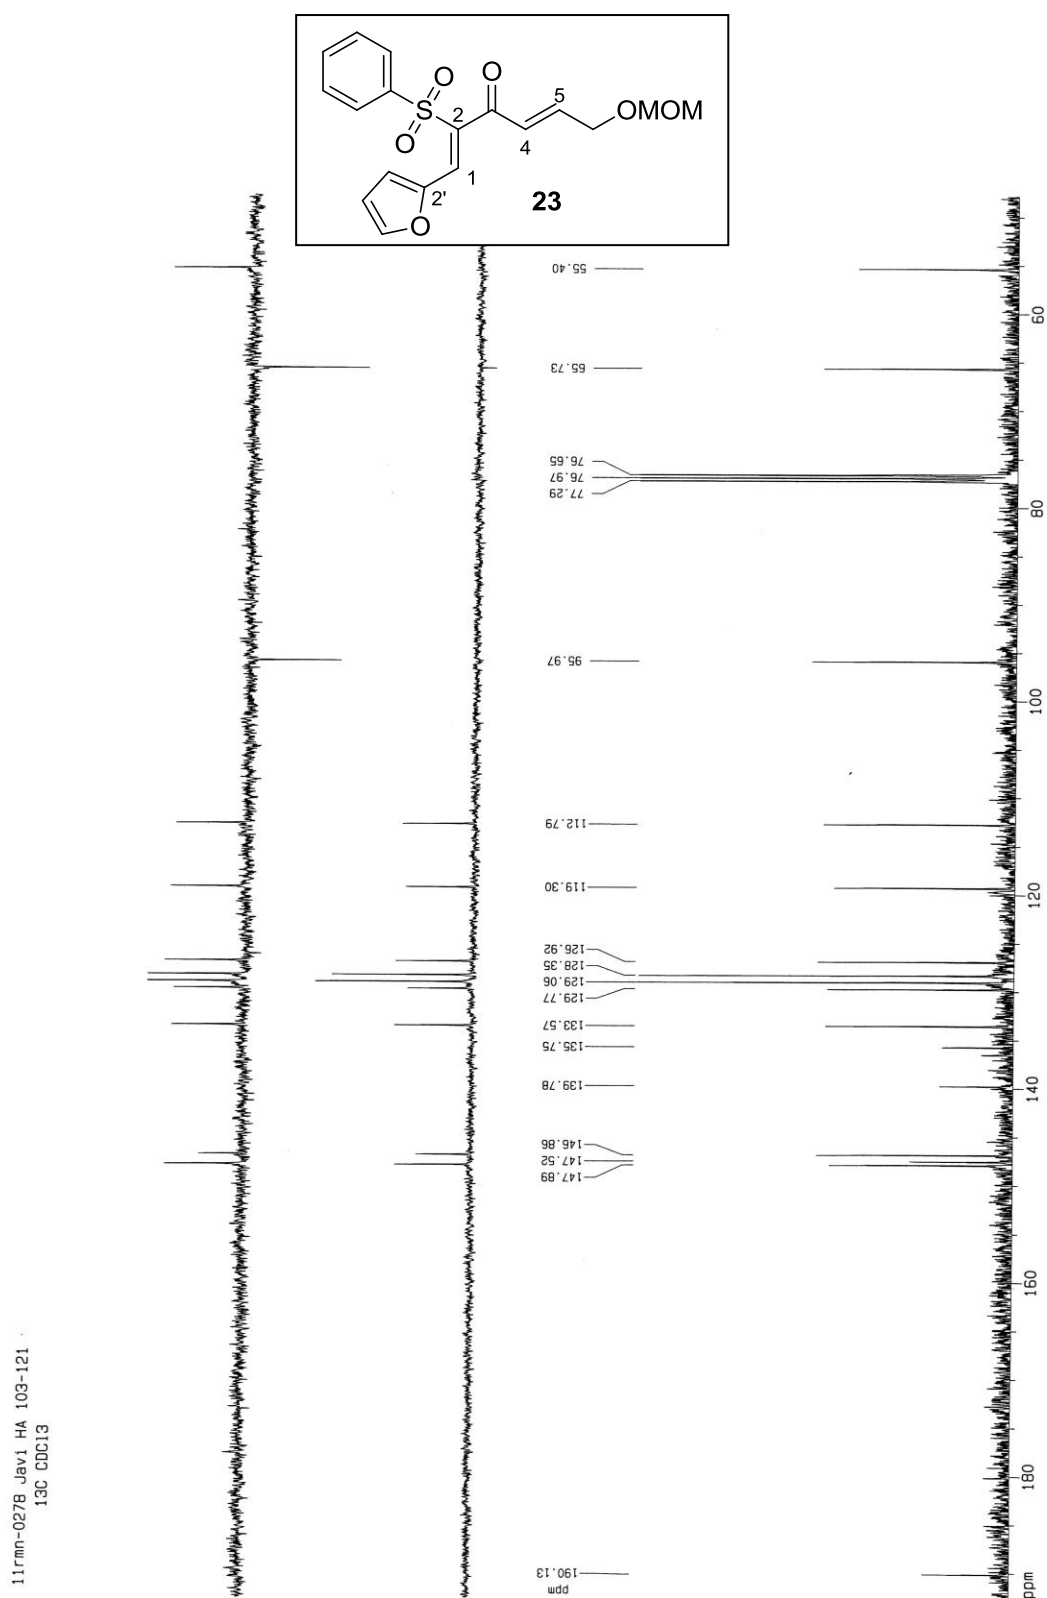

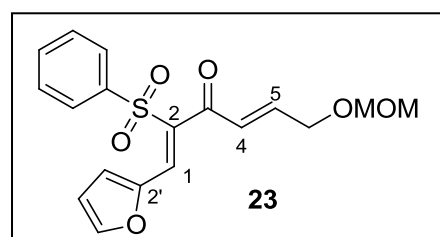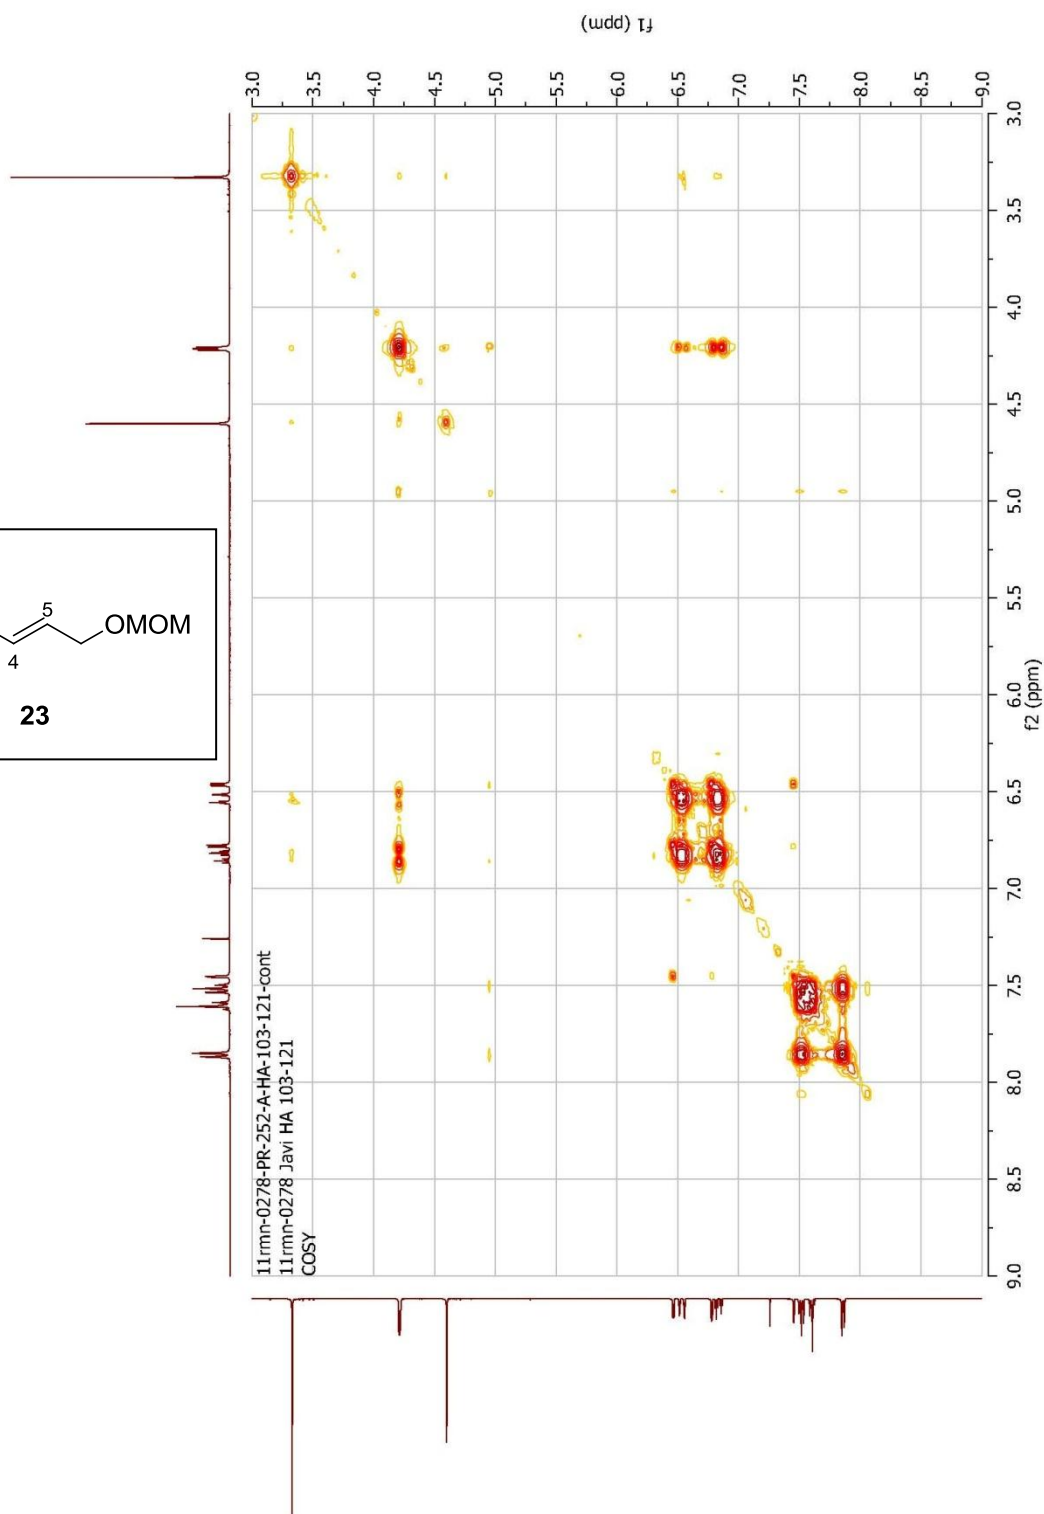

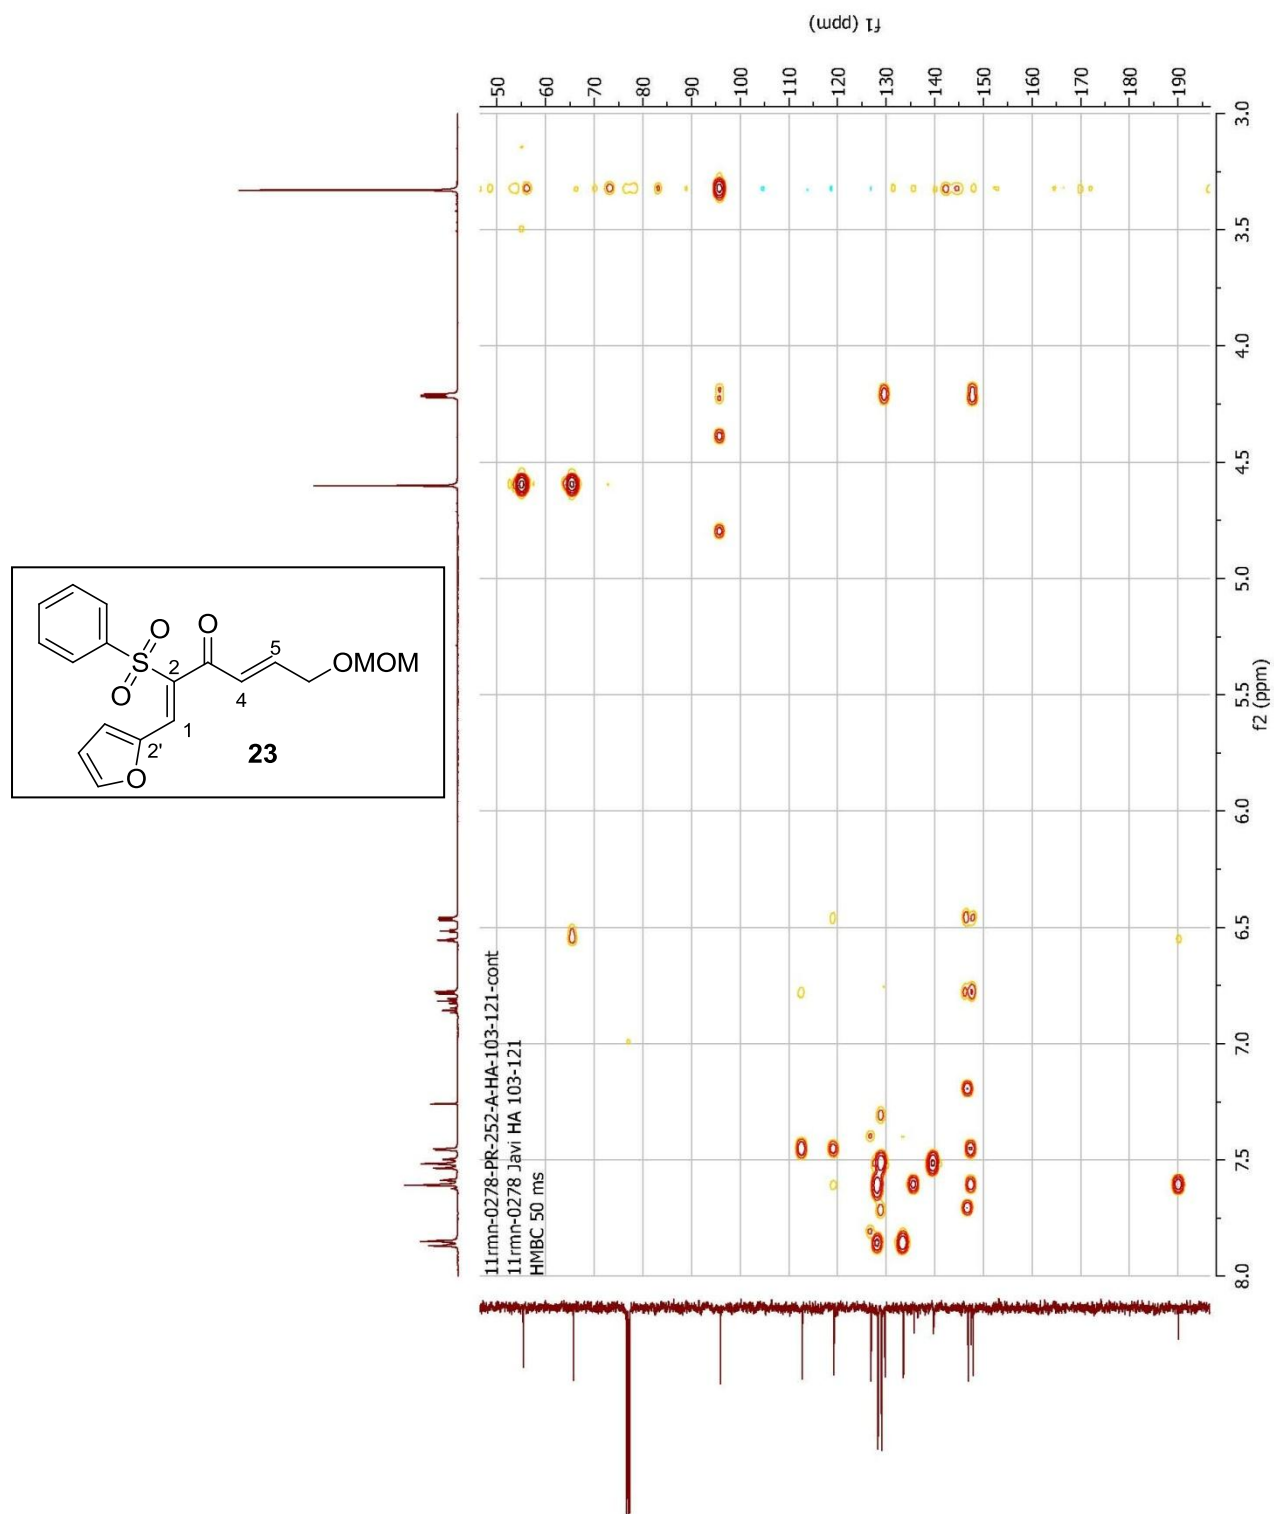



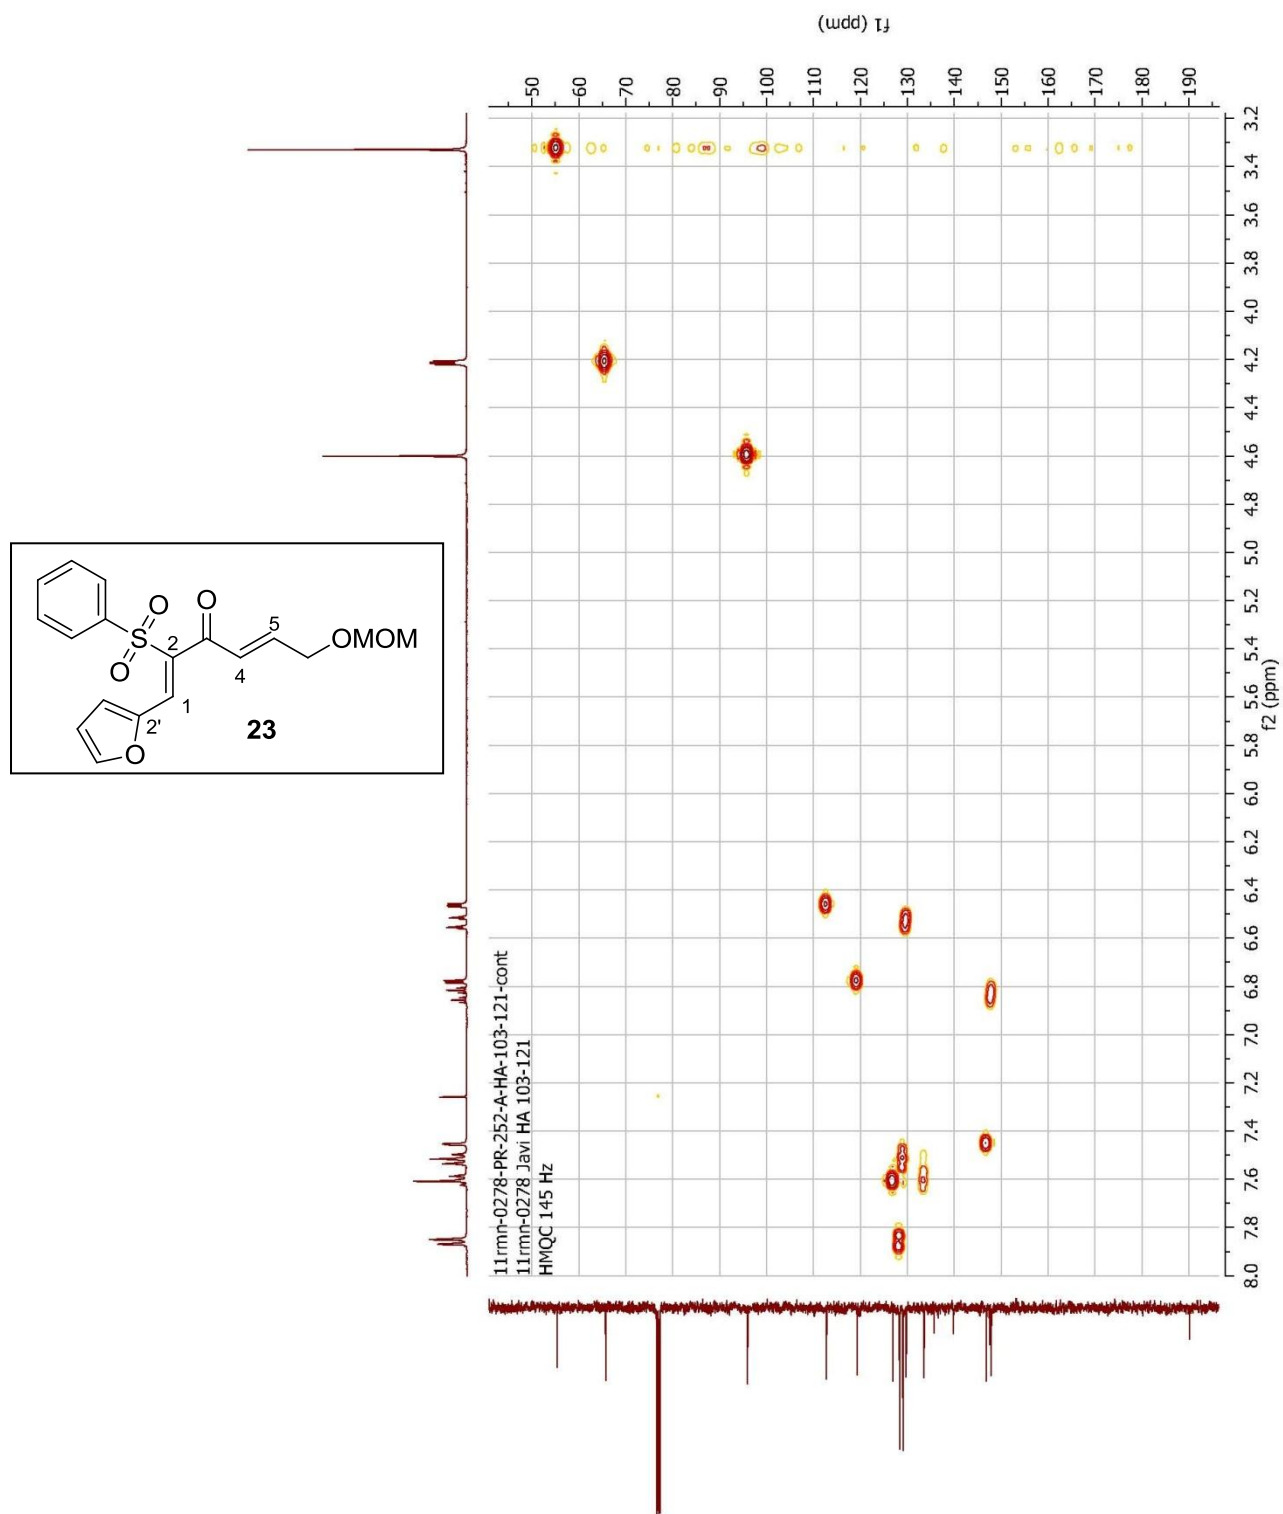

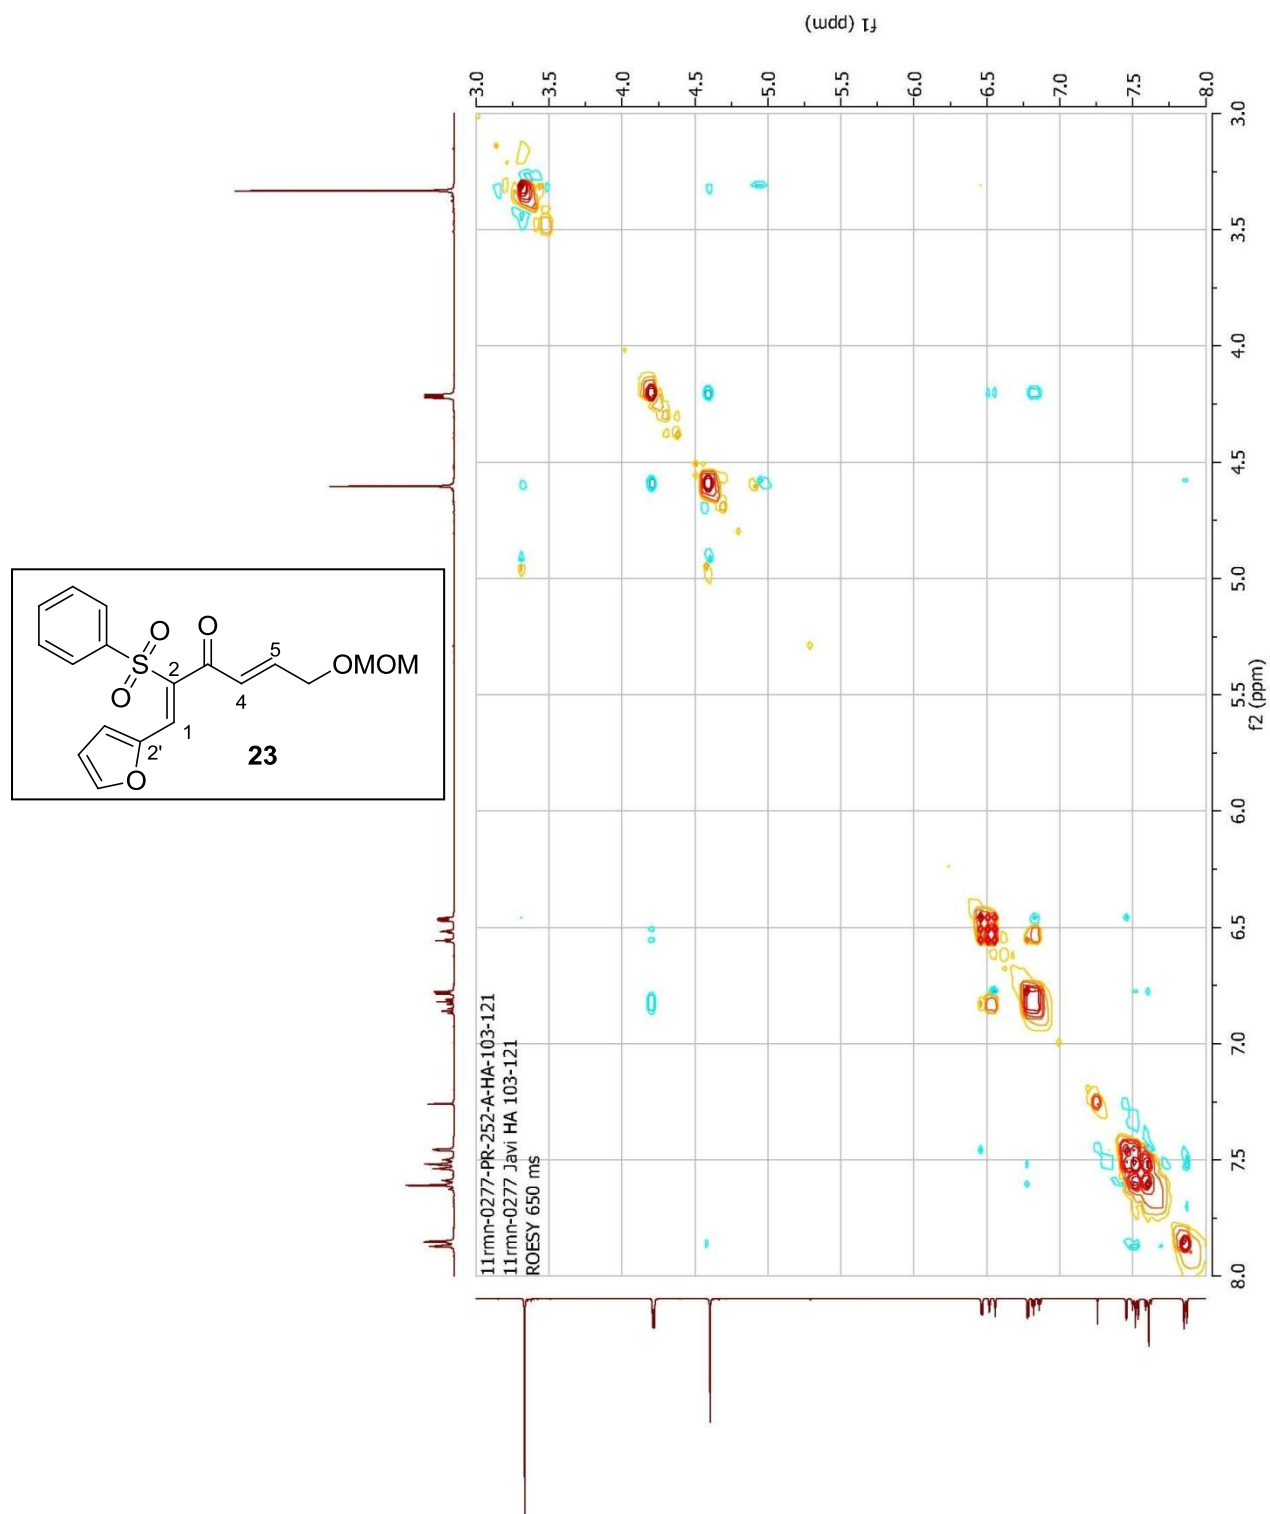

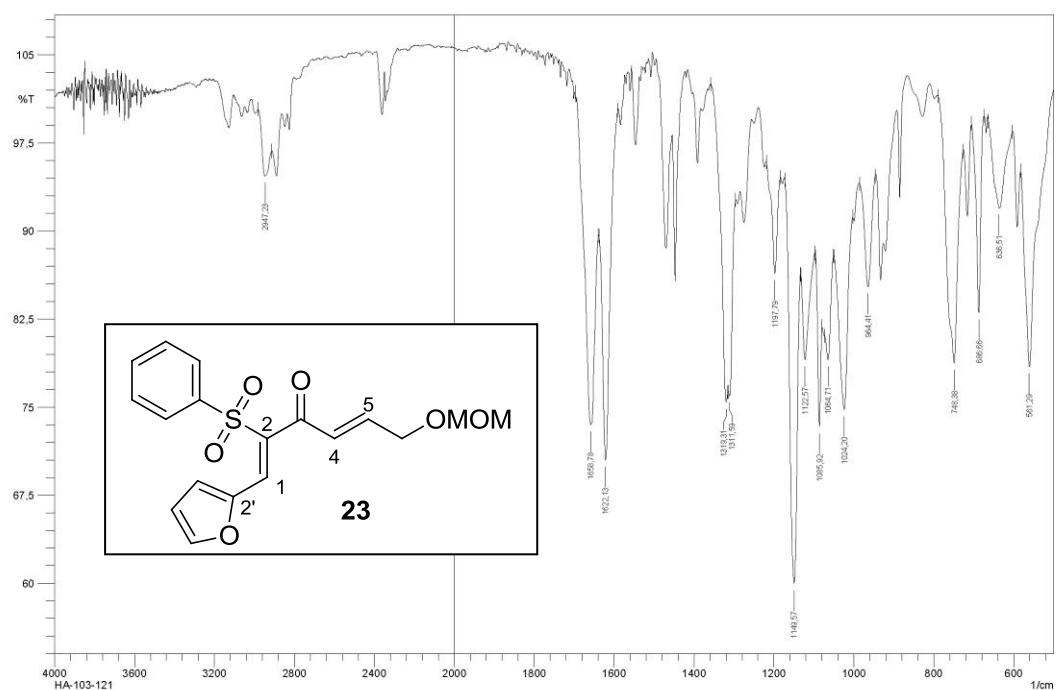

S. G. Espectrometría de Masas

Emitido por: César Raposo

(Responsable SGEM)

+TOF MS: 0.567 min from Sample 4 (cr-ha-103-121) of nov151118.wiff  
a=3.56661378329134110e-004, t0=3.53331440221918460e+001 R., subtracted (0.034 to 0...

Plaza de los Caídos 1-5

37008 Salamanca

página 1 de 1

11/15/2011

Masa exacta

Max. 375.0 counts.

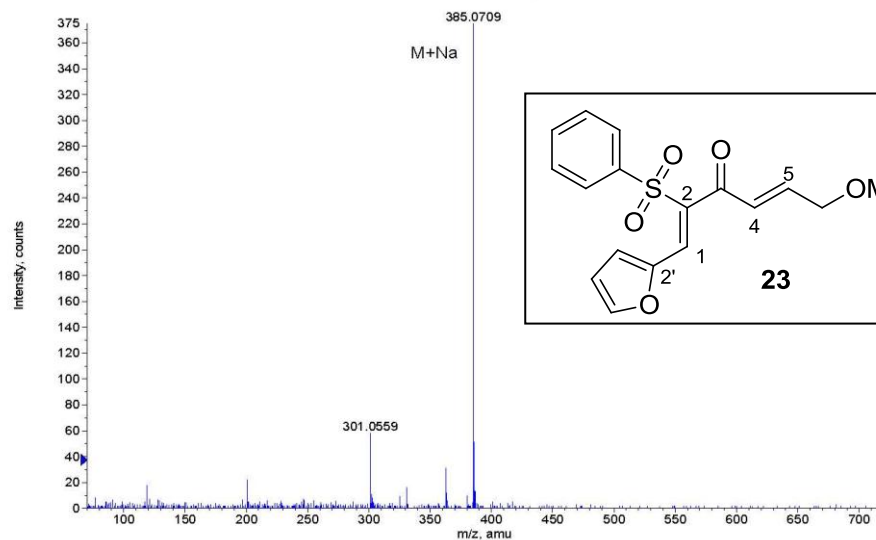

| Formula          | CalculatedMass | mDaError  | ppmError  | RDB  |
|------------------|----------------|-----------|-----------|------|
| H13 N14 O9 S     | 385.070517     | 0.383388  | 0.995628  | 1.5  |
| C16 H13 N6 O4 S  | 385.071351     | -0.451348 | -1.172115 | 13.5 |
| C15 H10 N10 Na S | 385.070283     | 0.6166    | 1.601261  | 15.5 |
| C18 H18 O6 Na S  | 385.071631     | -0.73148  | -1.899596 | 9.5  |

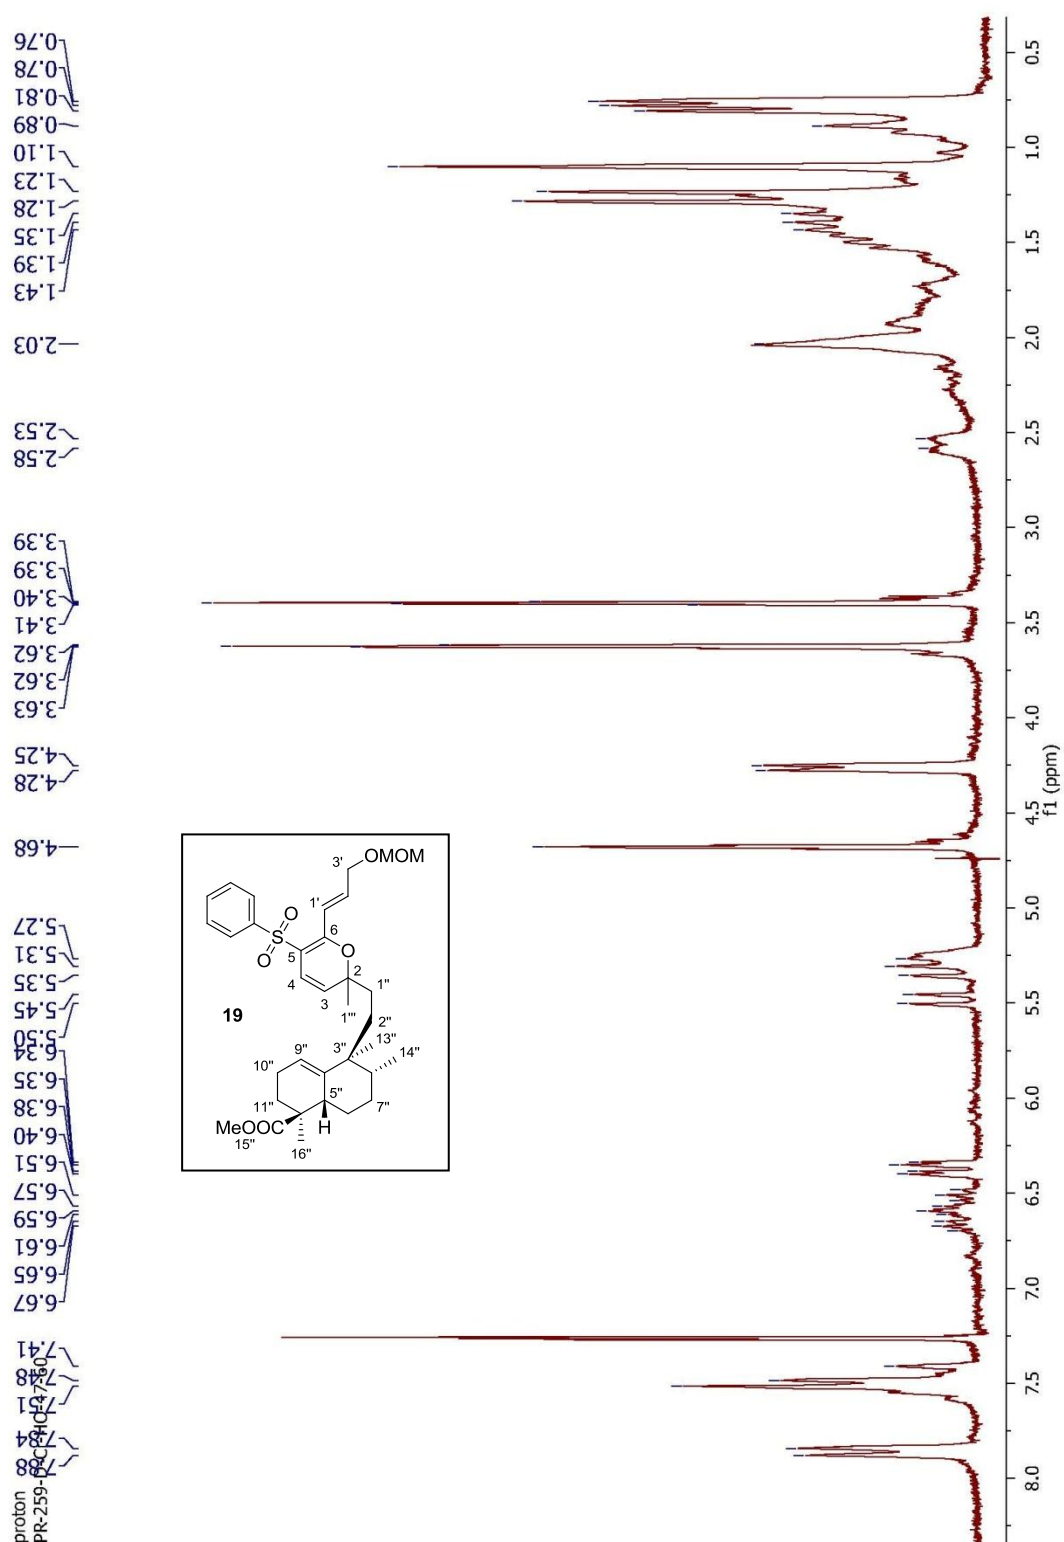

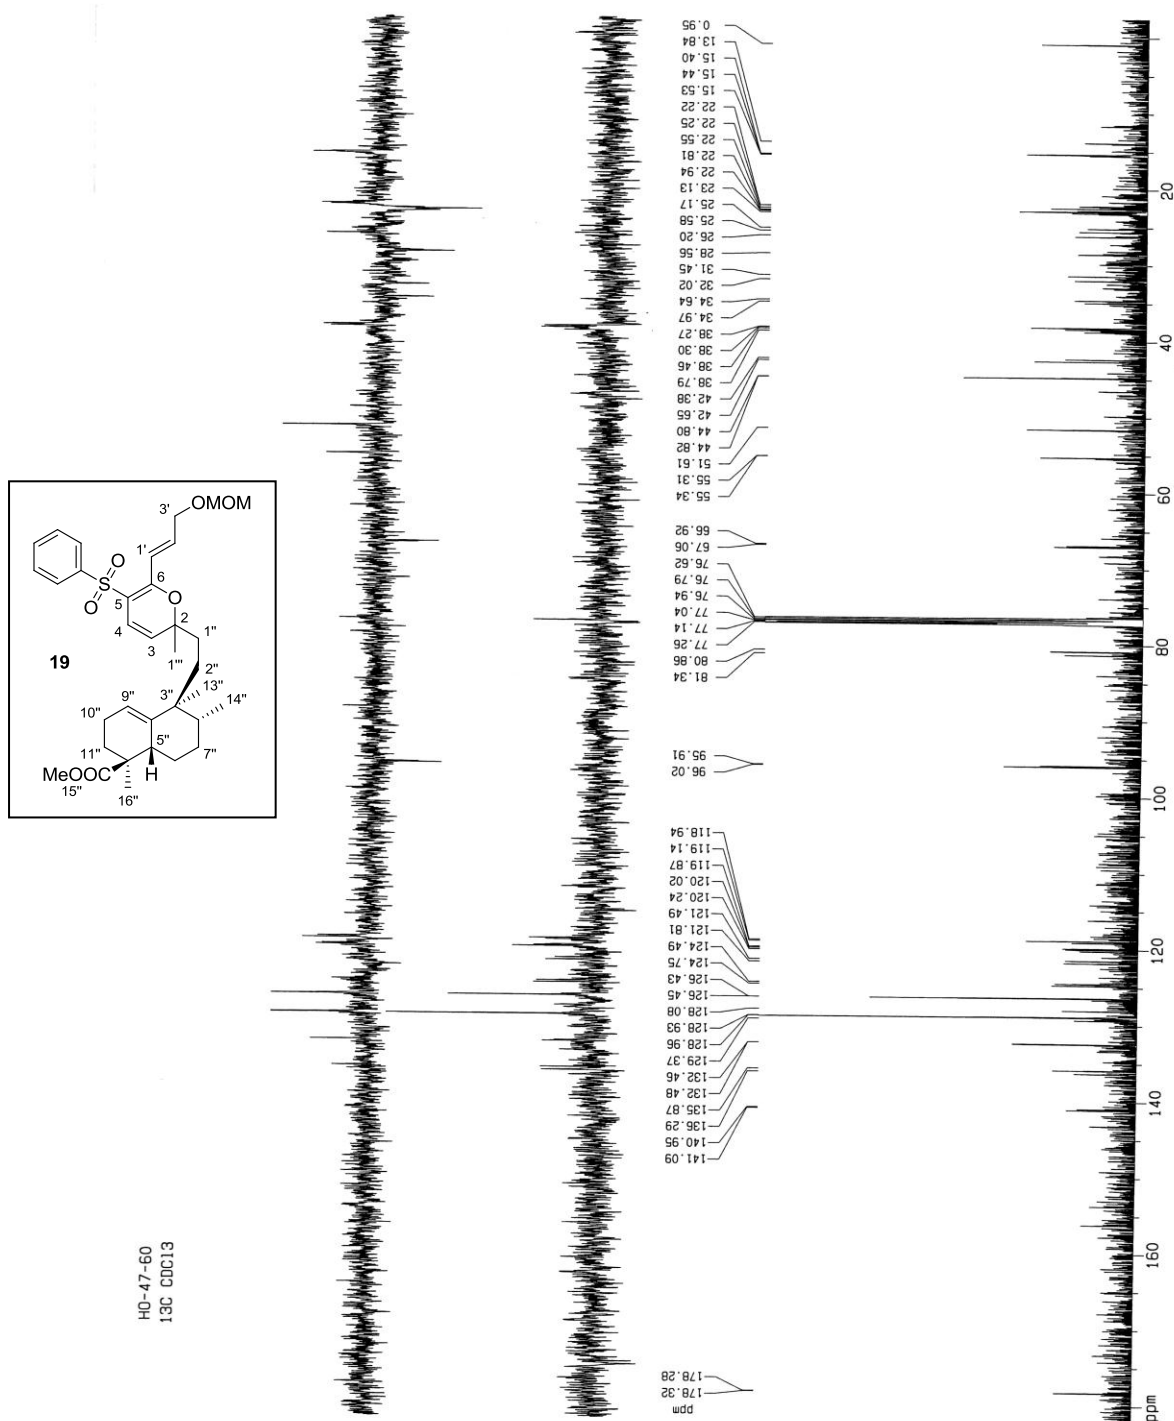

## 1. General

Unless otherwise stated, all chemicals were purchased as the highest purity commercially available and were used without further purification, except for **1a**,<sup>1</sup> 10-hydroxycitral **15**,<sup>2</sup> farnesal,<sup>3</sup> **18**<sup>4</sup> and **20**<sup>5</sup> which were synthesised according to the literature procedures. IR spectra were recorded on a BOMEM 100 FT-IR or an AVATAR 370 FT-IR Thermo Nicolet spectrophotometers. <sup>1</sup>H and <sup>13</sup>C NMR spectra were performed in CDCl<sub>3</sub> and referenced to the residual peak of CHCl<sub>3</sub> at δ 7.26 ppm and δ 77.0 ppm, for <sup>1</sup>H and <sup>13</sup>C, respectively, using Varian 200 VX and Bruker DRX 400 instruments. Chemical shifts are reported in δ ppm and coupling constants (*J*) are given in hertz. MS were performed at a VG-TS 250 spectrometer at 70 eV ionising voltage. Mass spectra are presented as *m/z* (% rel int.). HRMS were recorded on a VG Platform (Fisons) spectrometer using chemical ionisation (ammonia as gas) or Fast Atom Bombardment (FAB) technique. For some of the samples, QSTAR XL spectrometer was employed for electrospray ionisation (ESI). Optical rotations were determined on a Perkin-Elmer 241 polarimeter in 1 dm cell. HPLC analysis were carried out on a CHIRALCEL™ AD-H column [cellulose tris(3,5-dimethylphenylcarbamate)] on silica gel using *n*-hexane/isopropyl alcohol. Column chromatography was performed using silica gel 60 (230-400 mesh), with solvent systems indicated in the relevant experimental procedures. Dichloromethane was distilled from calcium hydride; tetrahydrofuran and diethyl ether were distilled from sodium/benzophenone ketyl under argon atmosphere prior to use. Hexane was distilled prior to use.

## 2. Synthesis of the Nazarov reagents, 1b-1d.

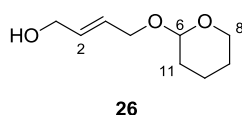

### 2.1 Monoprotection of (*E*)-1,4-butanediol with DHP: (*E*)-4-(((tetrahydro-2*H*-pyran-2-yl)oxy)but-2-en-1-ol, **26**.

(*E*)-1,4-butanediol (4 ml, 48.66 mmol) was dissolved in 194 ml of DCM under Ar at r.t. 3,4-Dihydro-2*H*-pyran (97%, 4.22g, 48.66 mmol) and *p*-toluenesulfonic acid monohydrate (93 mg, 0.486 mmol) were added and left to stir for 3 h. The reaction was quenched with a NaHCO<sub>3</sub> saturated solution, and extracted with DCM. The combined organics were washed with H<sub>2</sub>O, brine, dried (Na<sub>2</sub>SO<sub>4</sub>), filtered and concentrated *in vacuo* to afford **26** (8.01 g, 96%). *v*<sub>max</sub> (liquid film) 3417, 2943, 2870, 1454, 1352, 1261, 1134; δ<sub>H</sub> (200 MHz; CDCl<sub>3</sub>) 5.88-5.33 (2H, m, H2 and H3), 4.67-4.60 (1H, m, H6), 4.32-3.99 (4H, m, H1 and H4), 3.92-3.71 (1H, m, H8<sub>a</sub>), 3.57-3.40 (1H, m, H8<sub>b</sub>), 1.91-1.36 (6H, m, H9, H10, and H11); δ<sub>C</sub> (50 MHz; CDCl<sub>3</sub>) 132.6, 127.3, 97.6, 62.6, 62.0, 57.9, 30.5, 25.4, 19.3; EIHRMS: Calcd for C<sub>9</sub>H<sub>16</sub>O<sub>3</sub> (M+Na): 195.0592; found: 195.0991 (M+Na).

<sup>1</sup> J. Peña, A. B. Antón, R. F. Moro, I. S. Marcos, N. M. Garrido and D. Díez, *Tetrahedron* 2011, **67**, 8331.

<sup>2</sup> S. Xie, S. Uesato, T. Fujita and H. Inouye, *J. Nat. Prod.* 1989, **52**, 701.

<sup>3</sup> K. Ishihara, H. Ishibashi and H. Yamamoto, *J. Am. Chem. Soc.* 2002, **124**, 3647.

<sup>4</sup> J. G. Urones, J. De Pascual Teresa, I. S. Marcos, D. Díez, N. M. Garrido and R. A. Guerra, *Phytochemistry* 1987, **26**, 1077.

<sup>5</sup> P. Basabe, M. de Román, D. Díez, I. S. Marcos, O. Boderó, A. Blanco, F. Mollinedo and J. G. Urones, *Synlett* 2008, **8**, 1149.
